# Supplementary material for: Synthesis and cytotoxicity of (−)-homo-renieramycin G and its derivatives
Source: Royal Society of Chemistry journal article supplement (doi:10.1039/d0ob02167a), 2020-01-01

## Supporting Information

### Synthesis and cytotoxicity of (-)-homo-renieramycin G and its derivatives

Yantao Ma,<sup>a</sup> Xuan Pan,<sup>a</sup> Baohe Guan,<sup>a</sup> Guangyan Zhang,<sup>a</sup>  
Zhanzhu Liu<sup>\*a</sup>

<sup>a</sup>State Key Laboratory of Bioactive Substances and Functions of Natural Medicines,  
Institute of Materia Medica, Peking Union Medical College and Chinese Academy of  
Medical Sciences, Beijing 100050, P. R. China

\*E-mail: liuzhazhu@imm.ac.cn

# <sup>1</sup>H NMR of compound 1

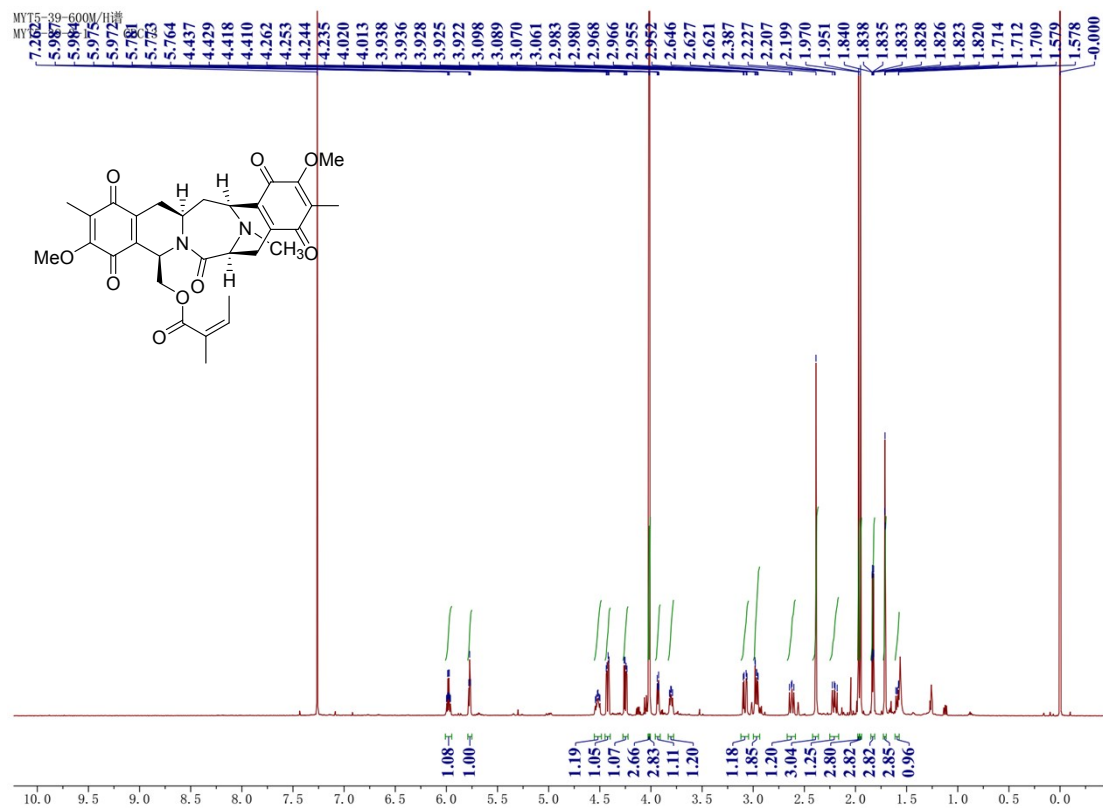

# <sup>13</sup>C NMR of compound 1

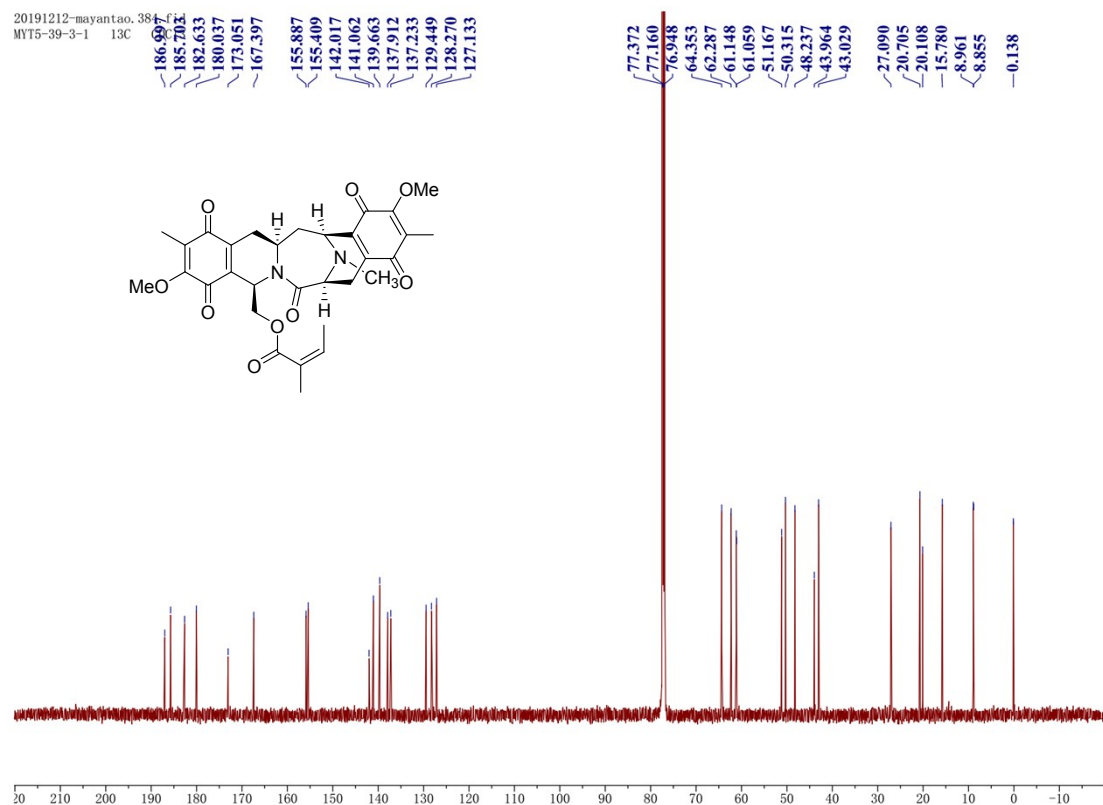

### <sup>1</sup>H NMR of compound 4

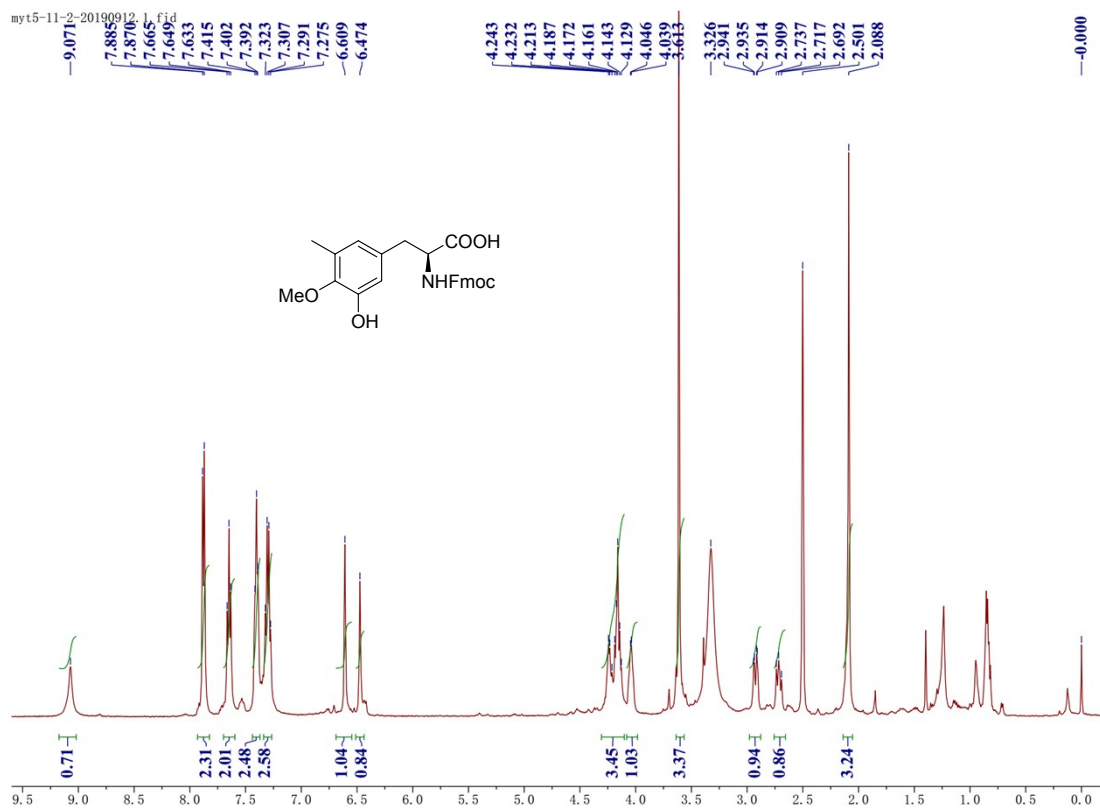

### <sup>1</sup>H NMR of compound 4

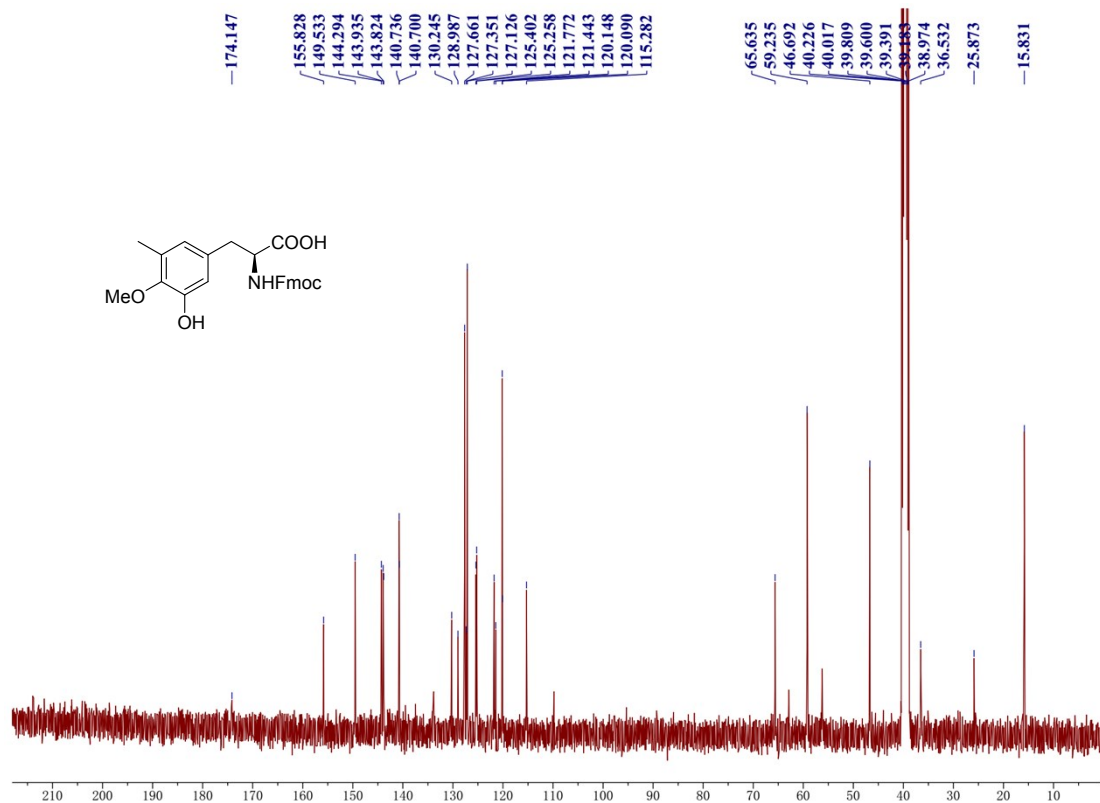

# <sup>1</sup>H NMR of compound 5

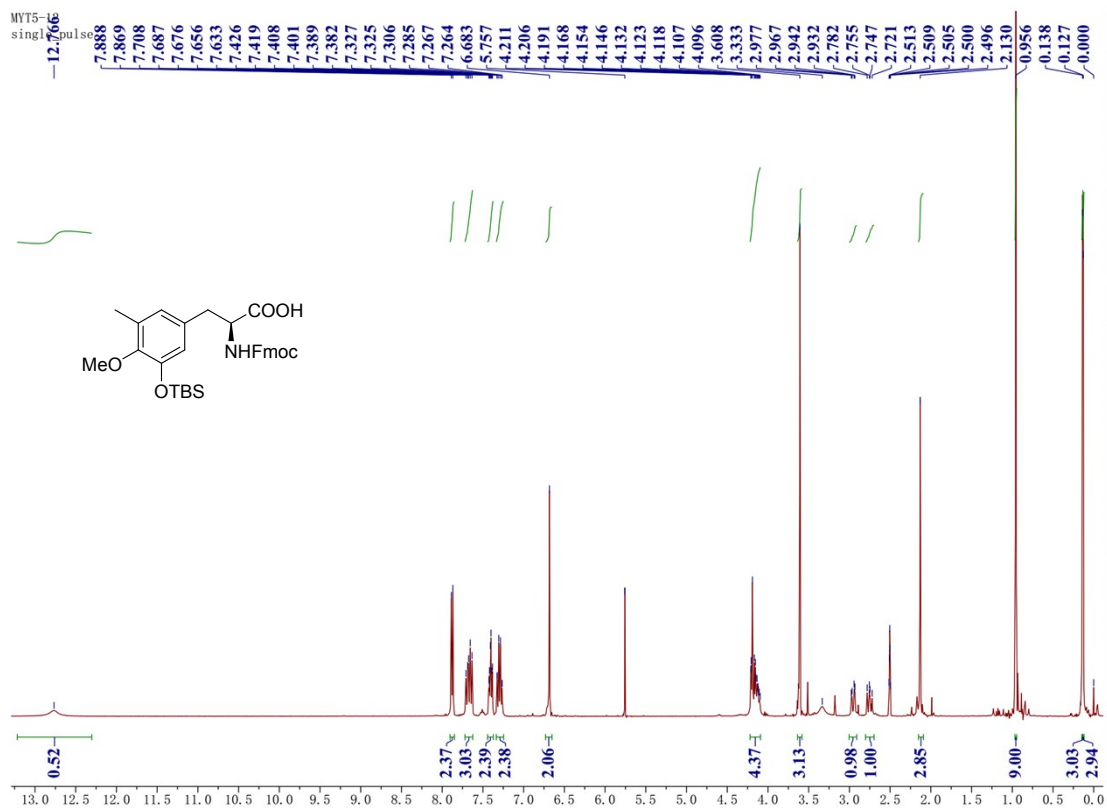

# <sup>13</sup>C NMR of compound 5

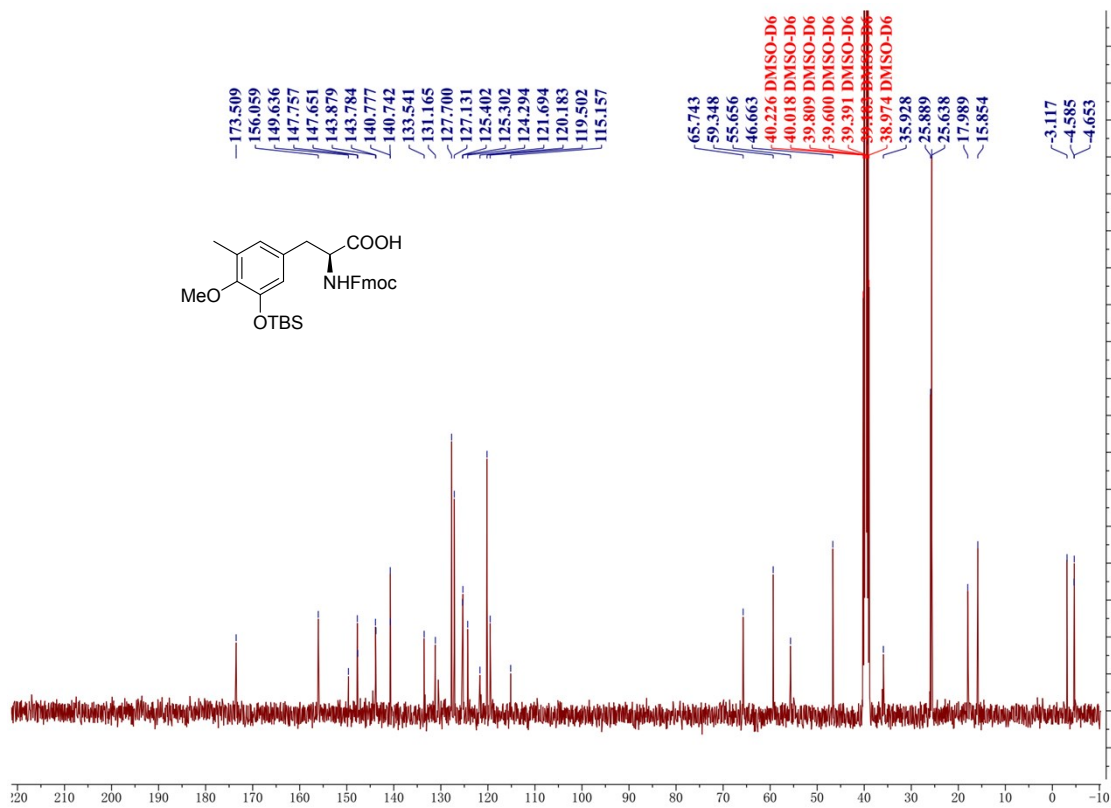

### <sup>1</sup>H NMR of compound 7

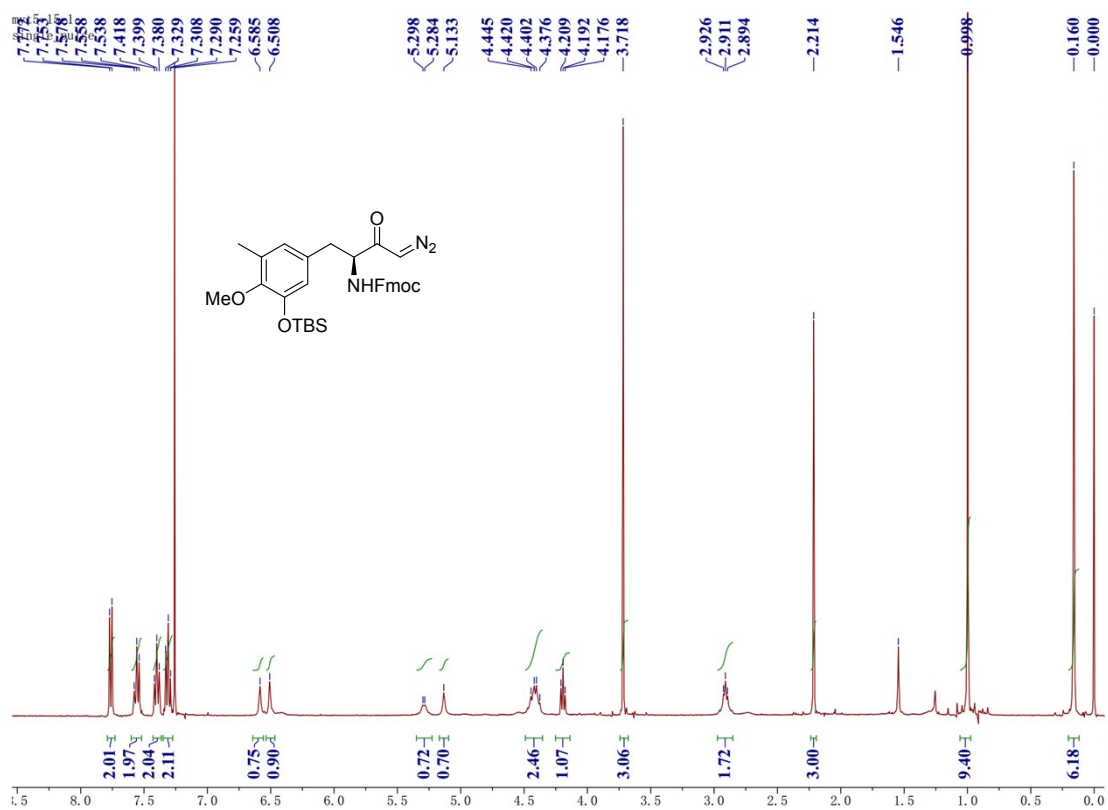

### <sup>13</sup>C NMR of compound 7

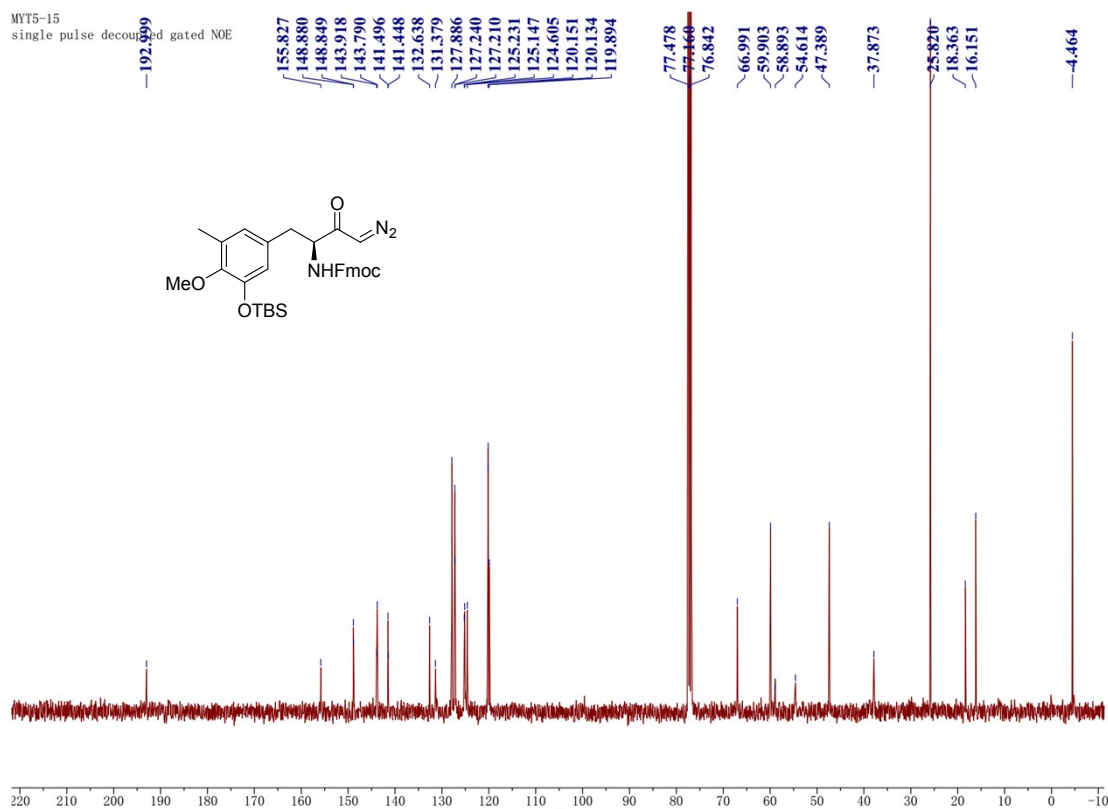

# <sup>1</sup>H NMR of compound 8

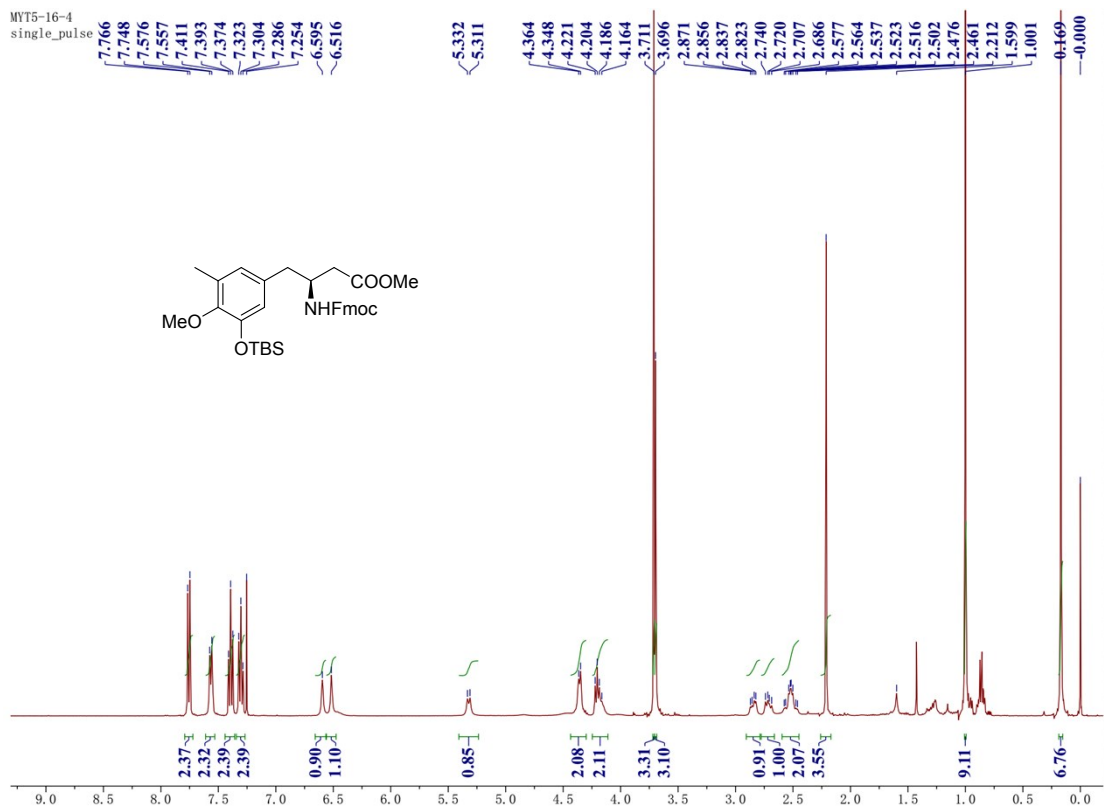

# <sup>13</sup>C NMR of compound 8

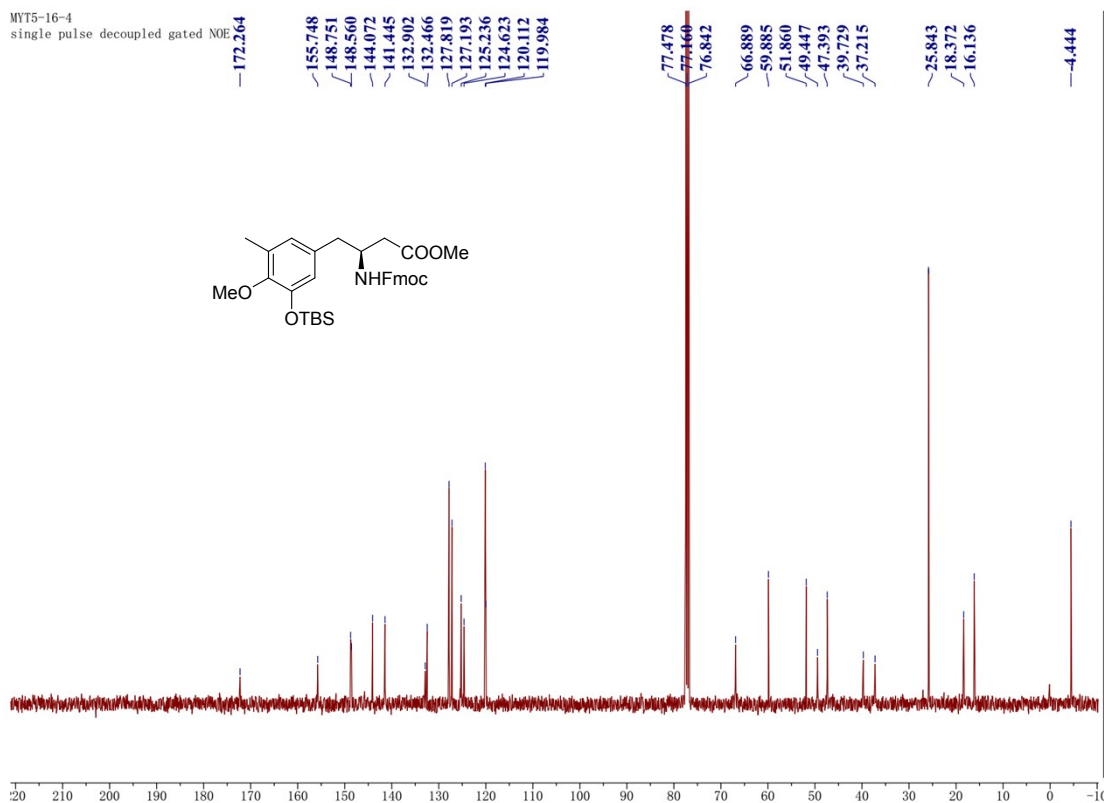

# <sup>1</sup>H NMR of compound 9

MYT5-21  
single\_pulse

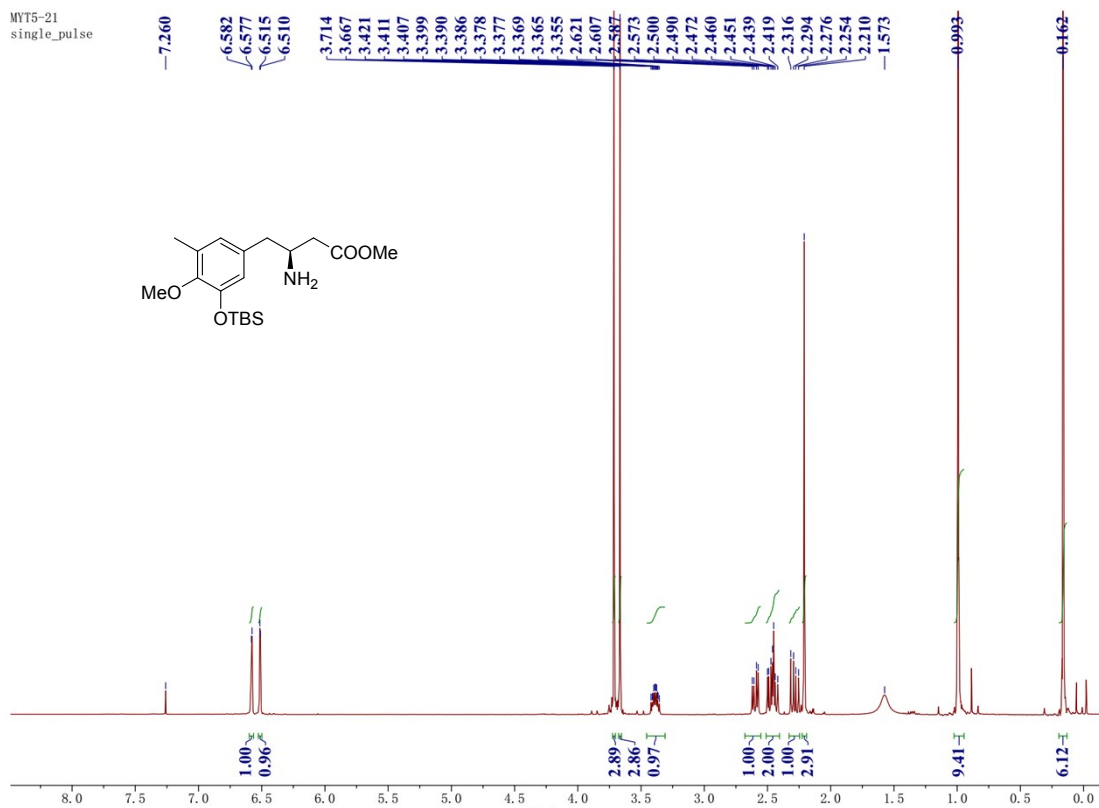

# <sup>13</sup>C NMR of compound 9

MYT5-21  
single pulse decoupled gated NOE

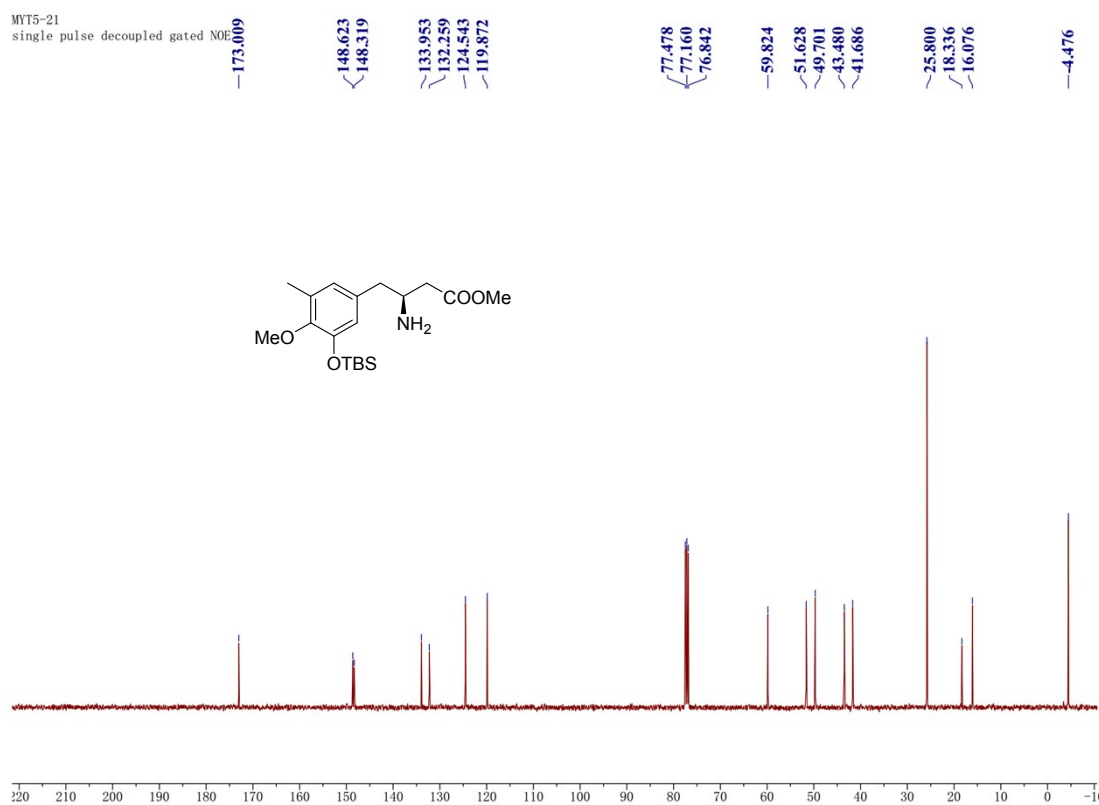

# <sup>1</sup>H NMR of compound 10

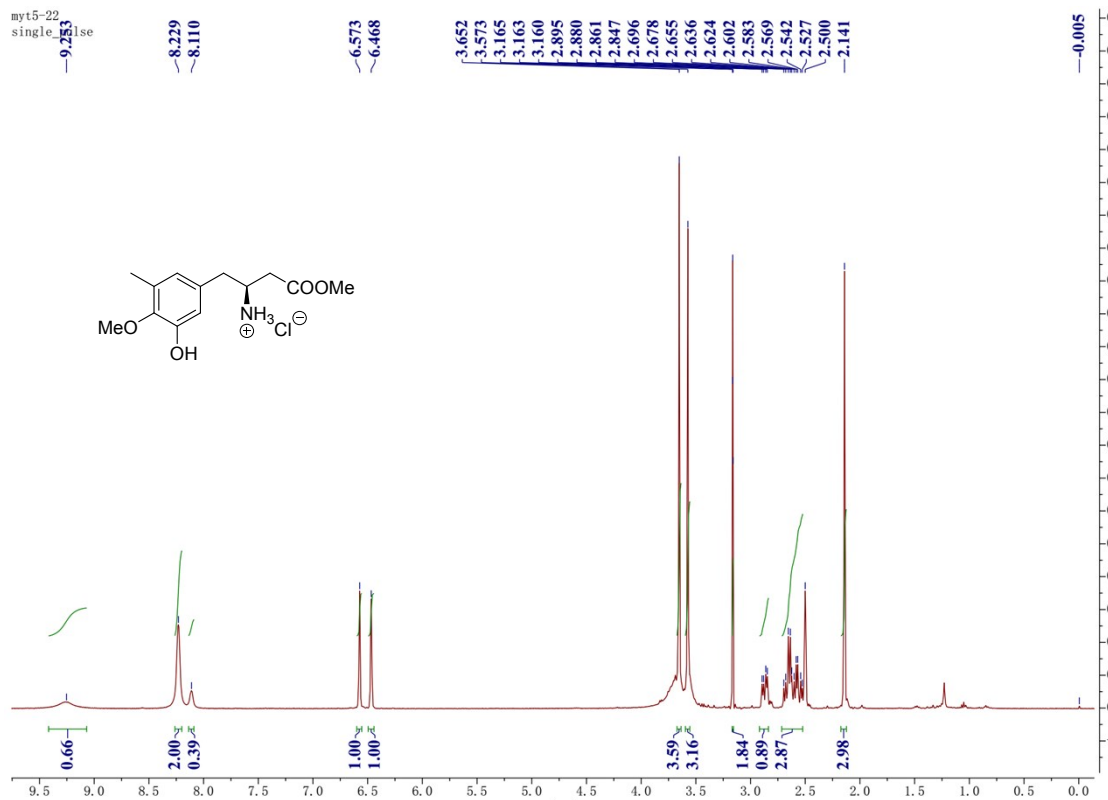

# <sup>13</sup>C NMR of compound 10

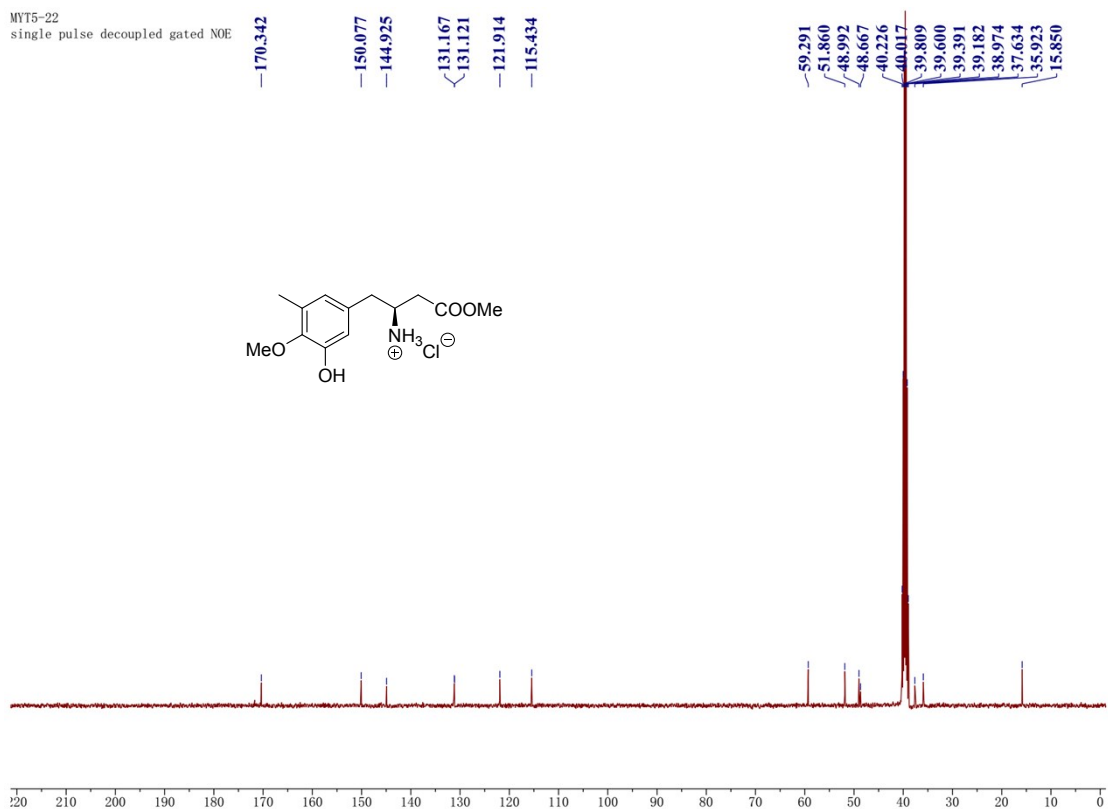



# <sup>1</sup>H NMR of compound 11

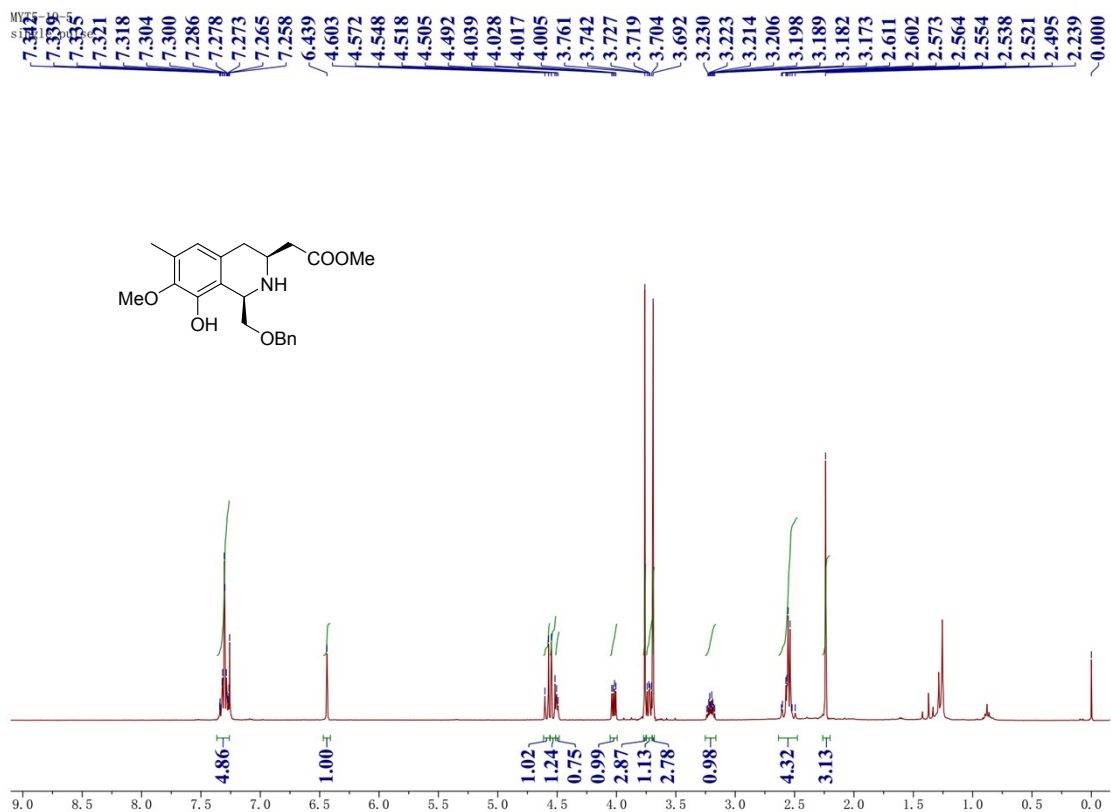

# <sup>13</sup>C NMR of compound 11

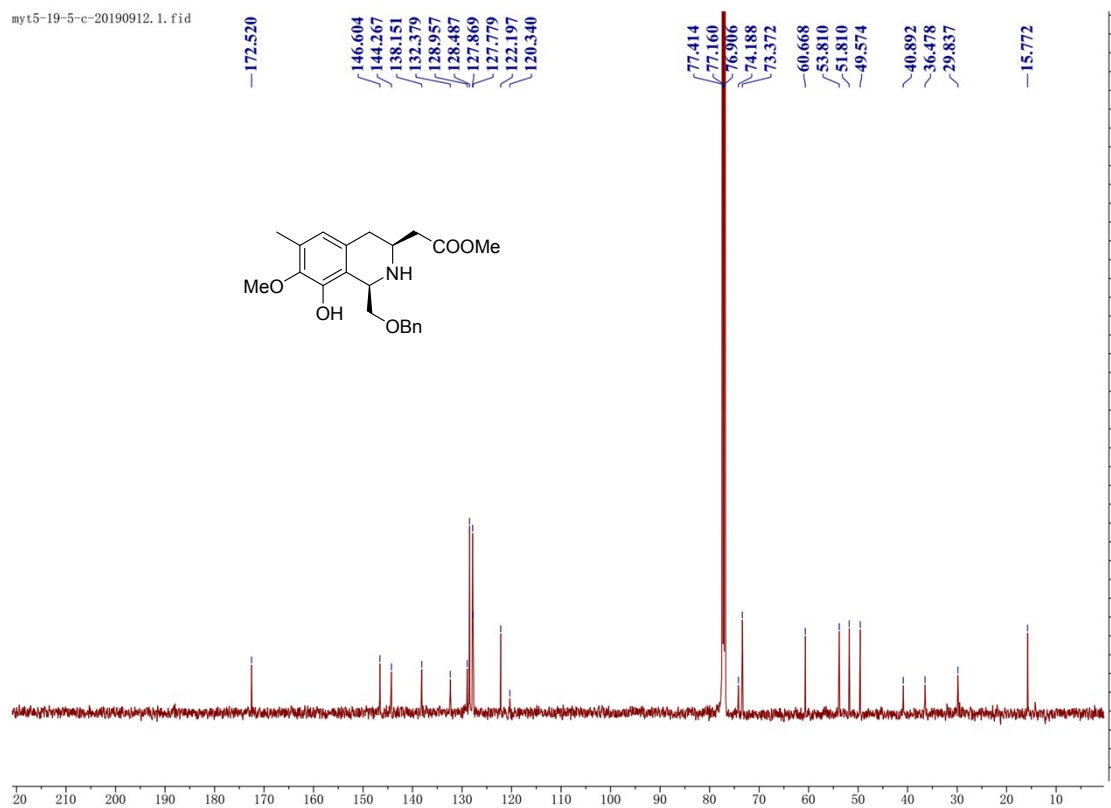

# <sup>1</sup>H NMR of compound 12

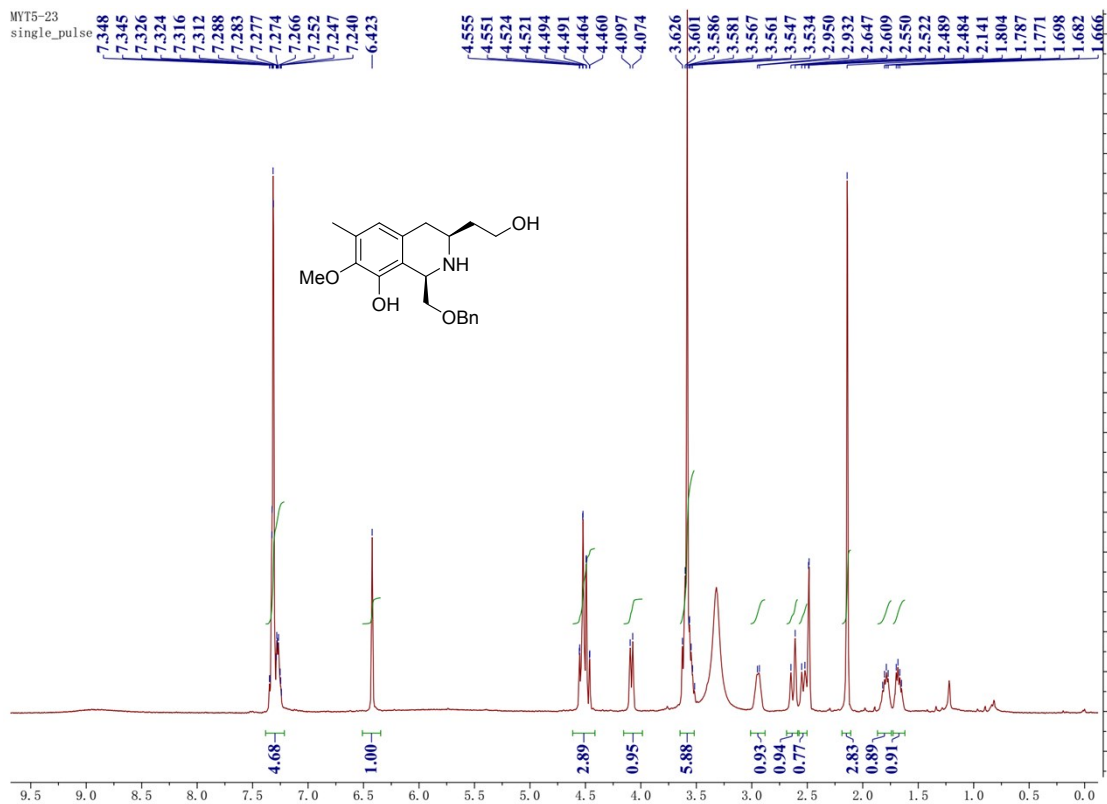

# <sup>13</sup>C NMR of compound 12

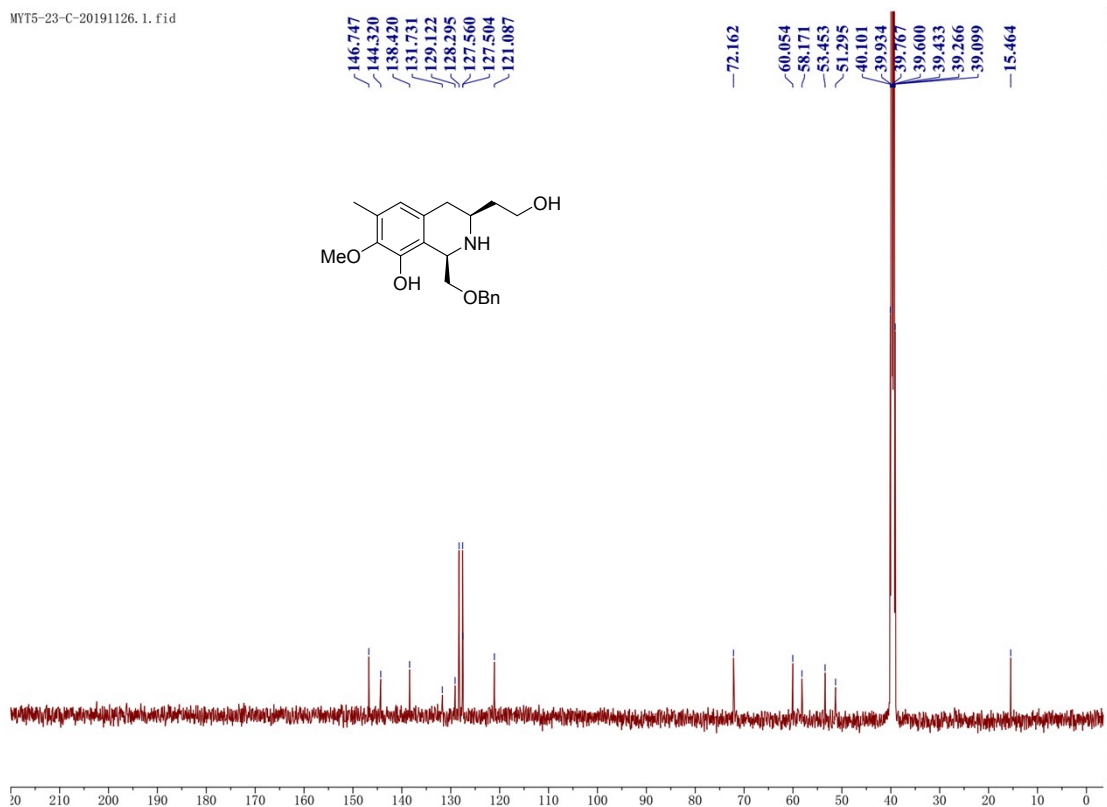

### <sup>1</sup>H NMR of compound 13

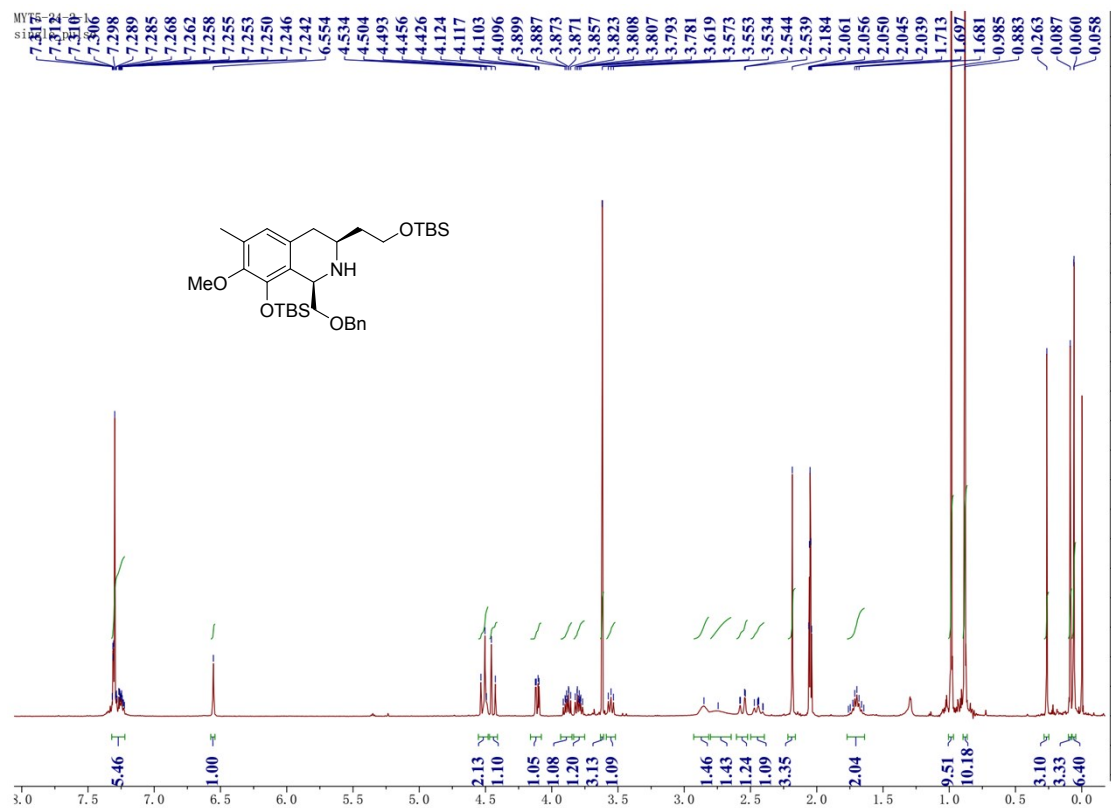

### <sup>13</sup>C NMR of compound 13

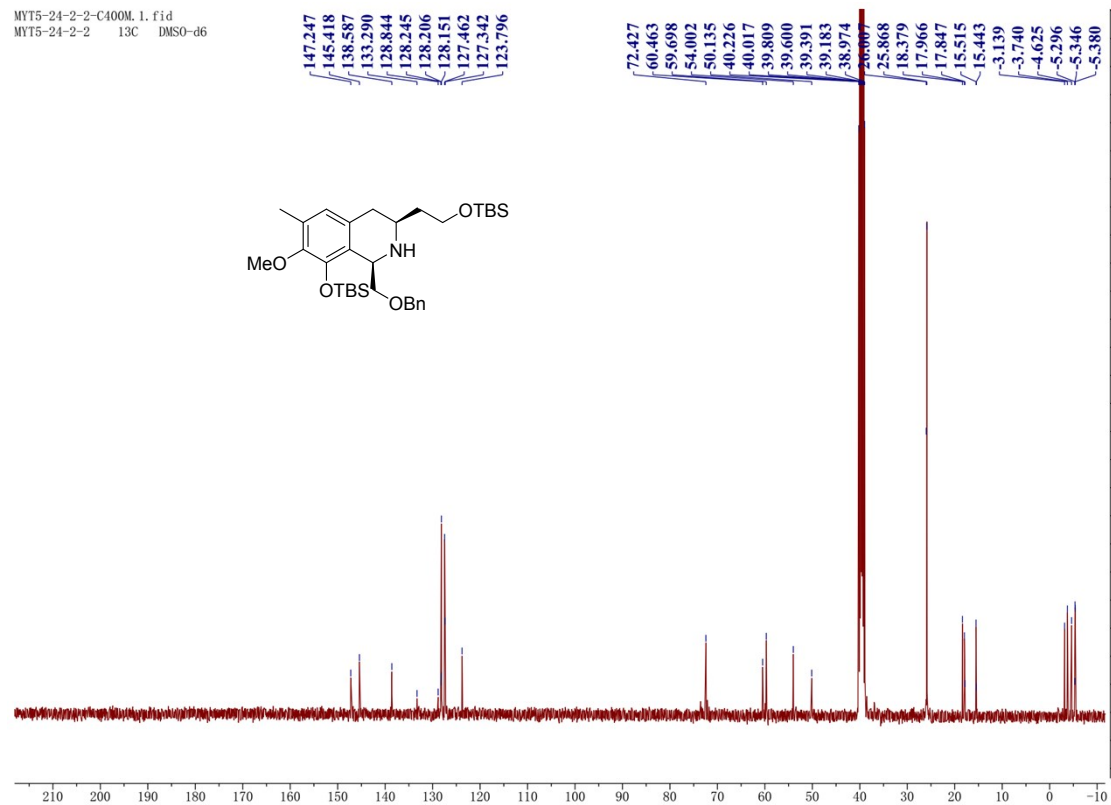

# NOESY of compound 13

yaowus.6.fid  
selective noe 1d  
irrate 2.86

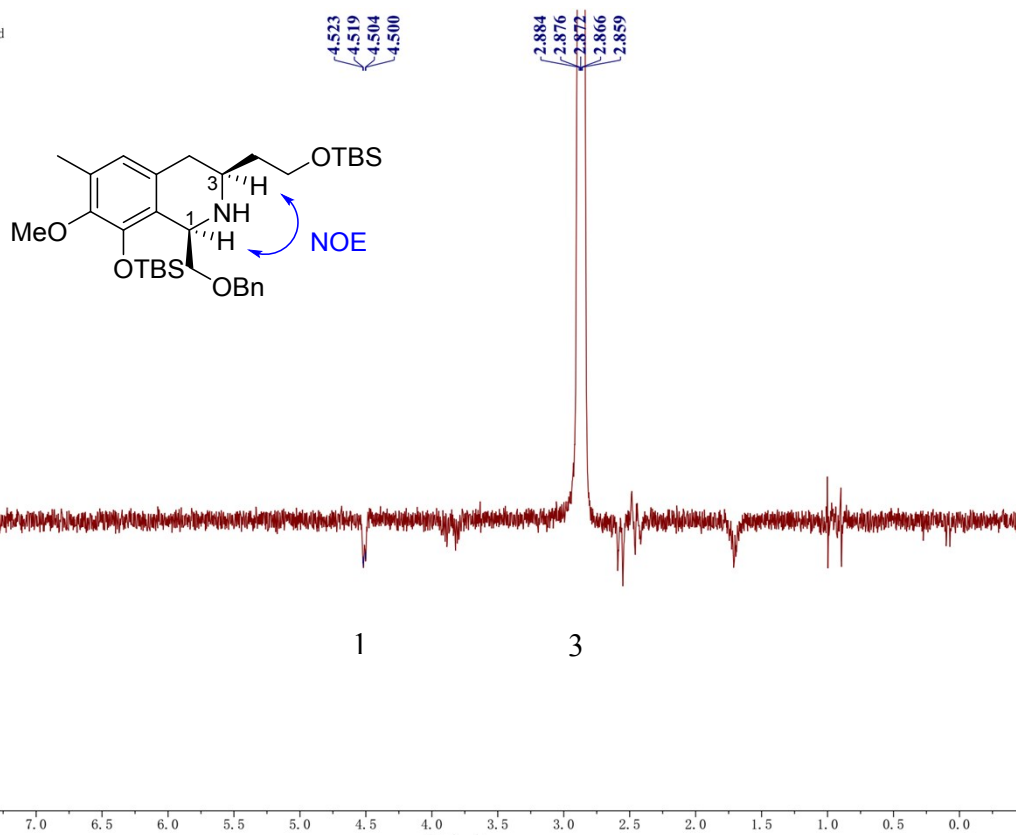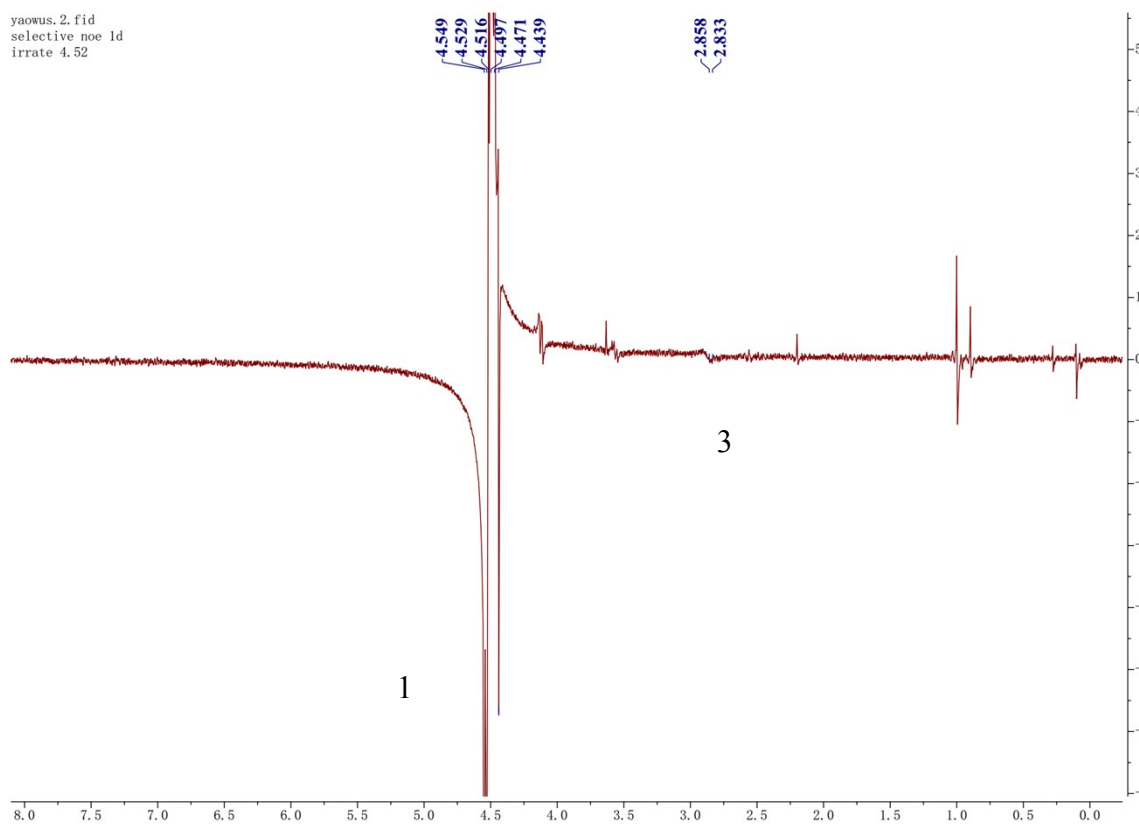

### <sup>1</sup>H NMR of compound 14

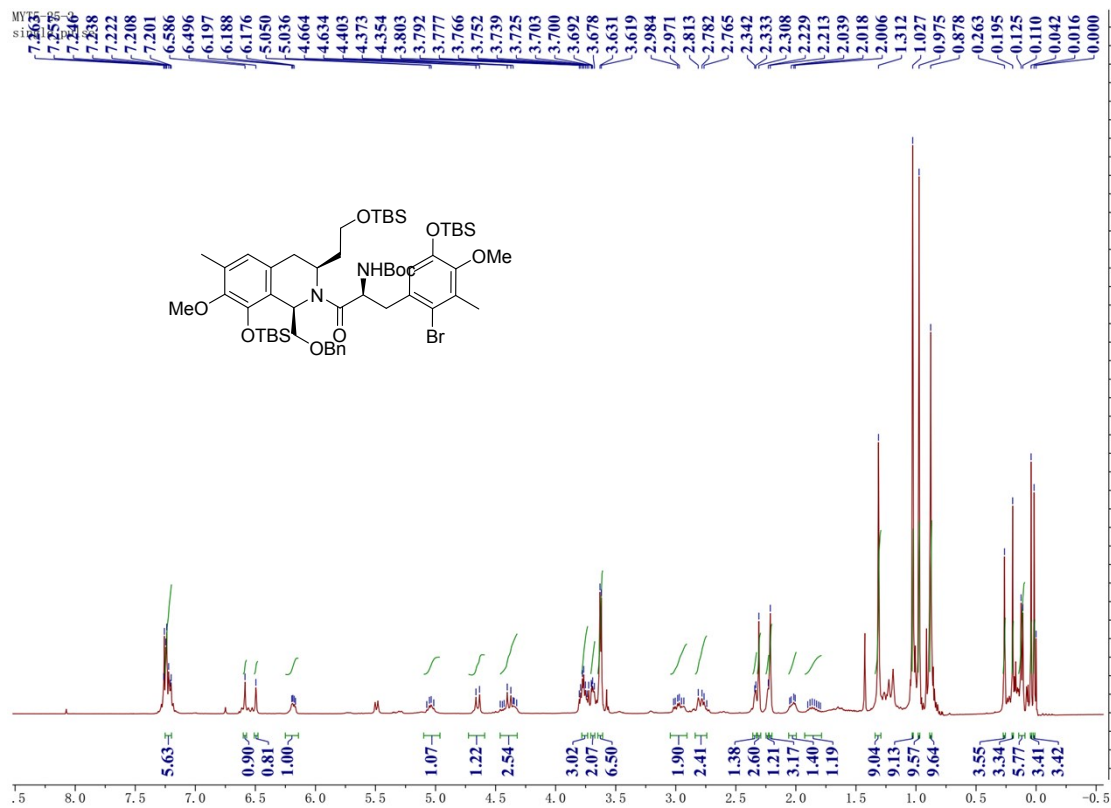

### <sup>13</sup>C NMR of compound 14

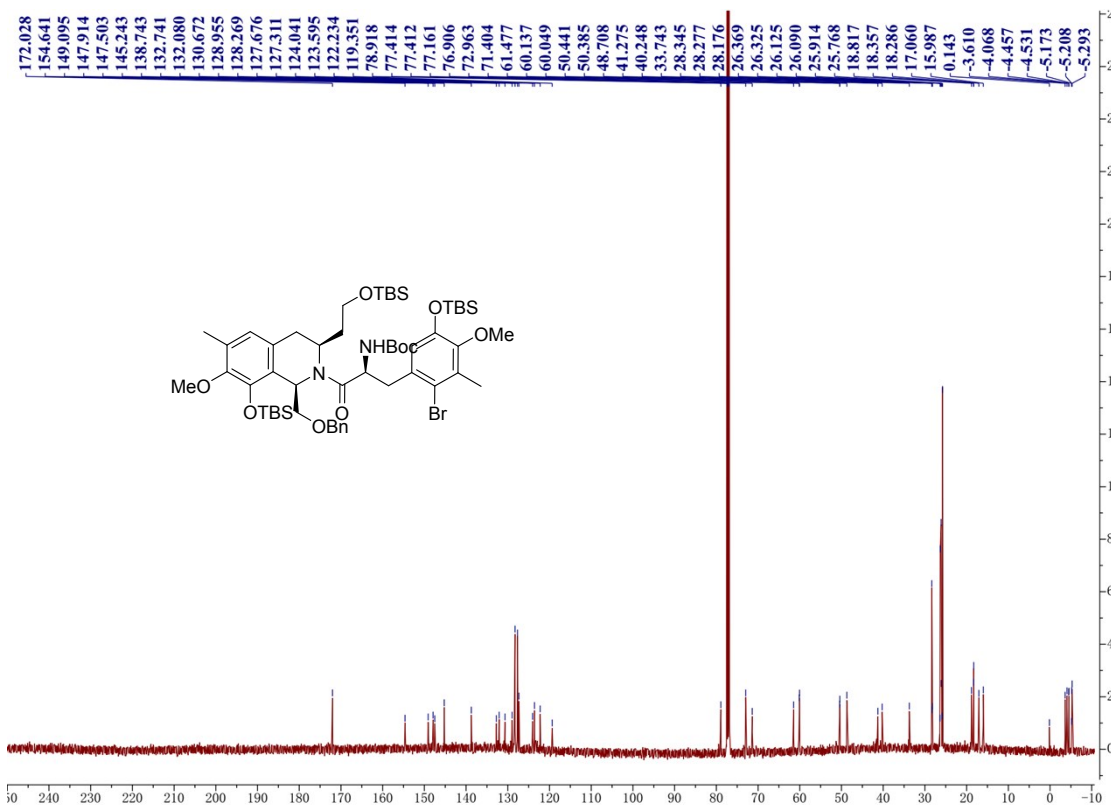

# <sup>1</sup>H NMR of compound 15

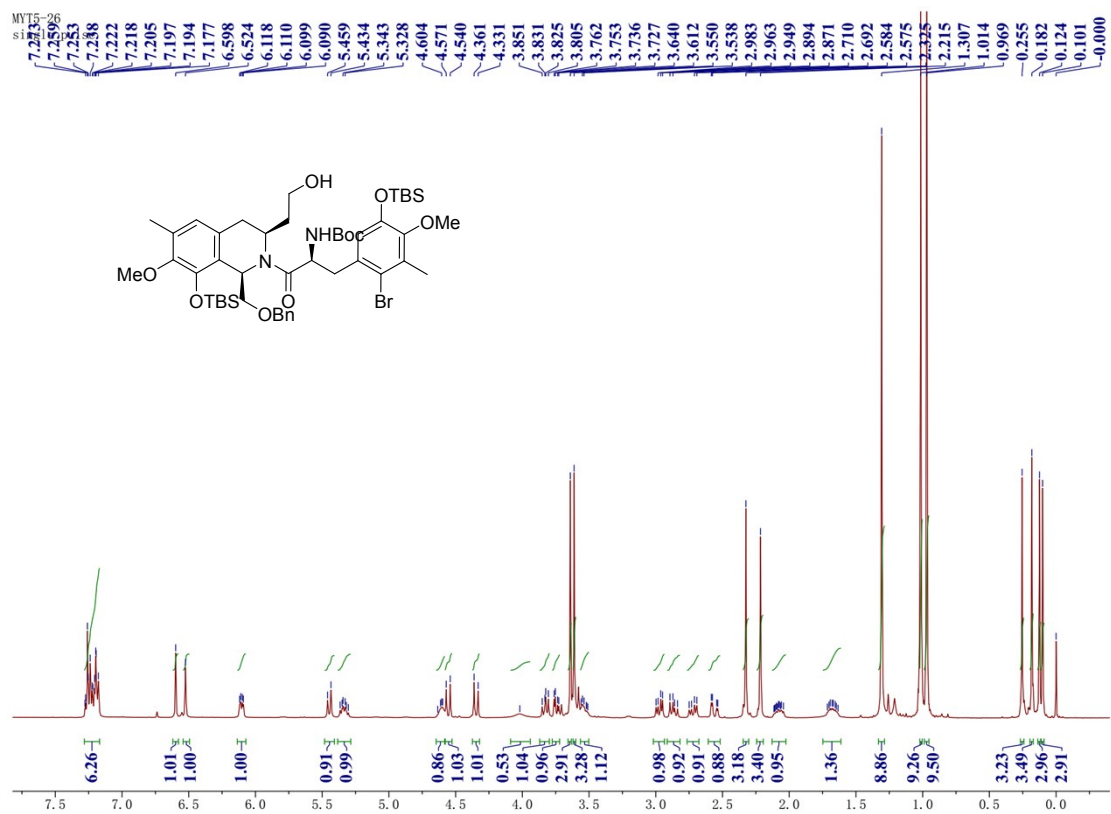

# <sup>13</sup>C NMR of compound 15

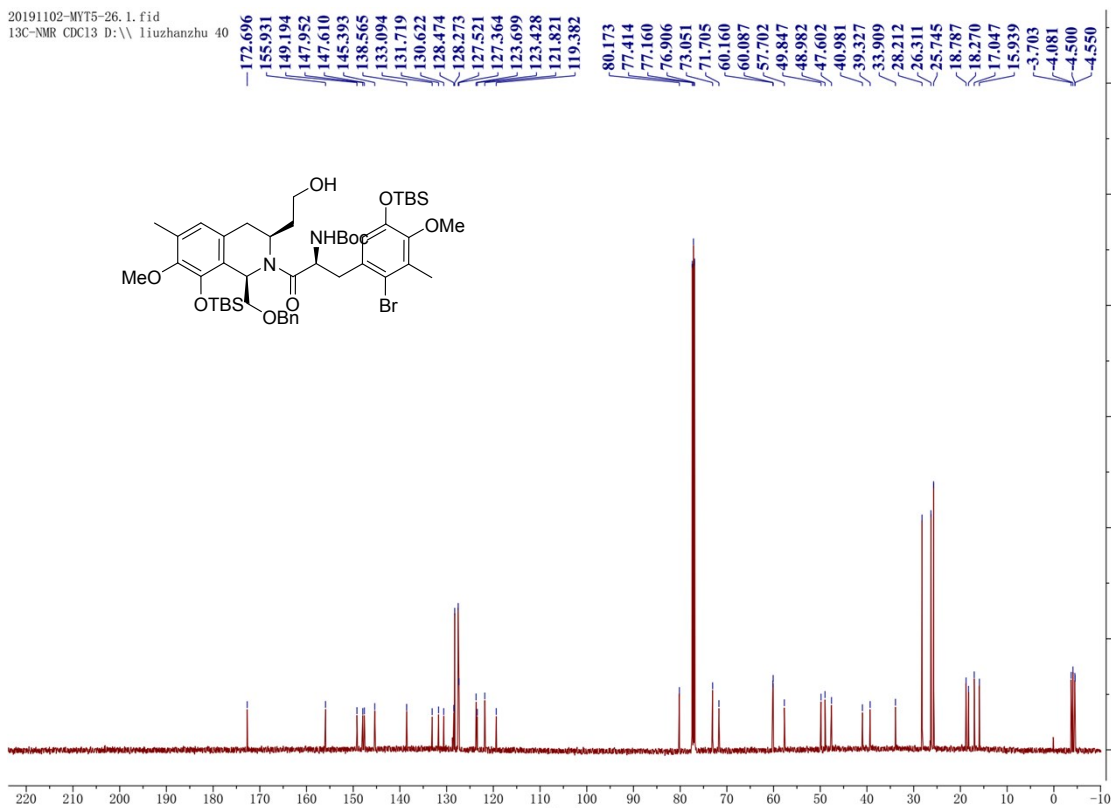

# <sup>1</sup>H NMR of compound 17

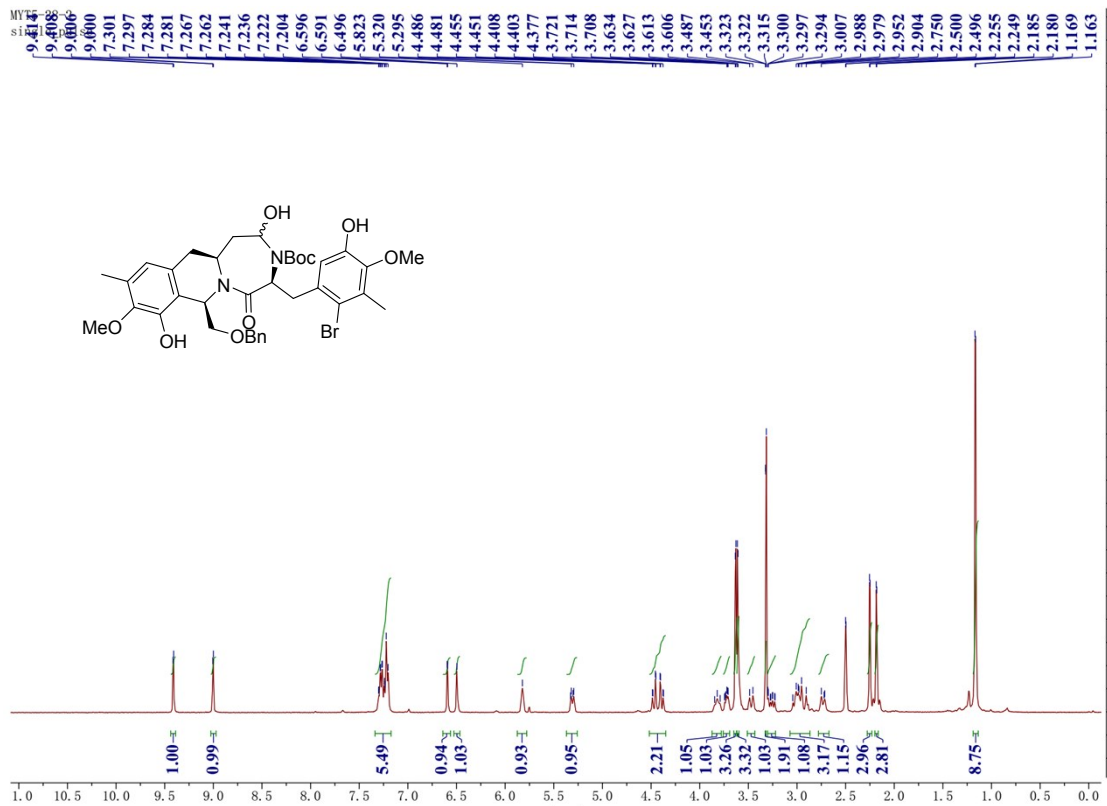

# <sup>13</sup>C NMR of compound 17

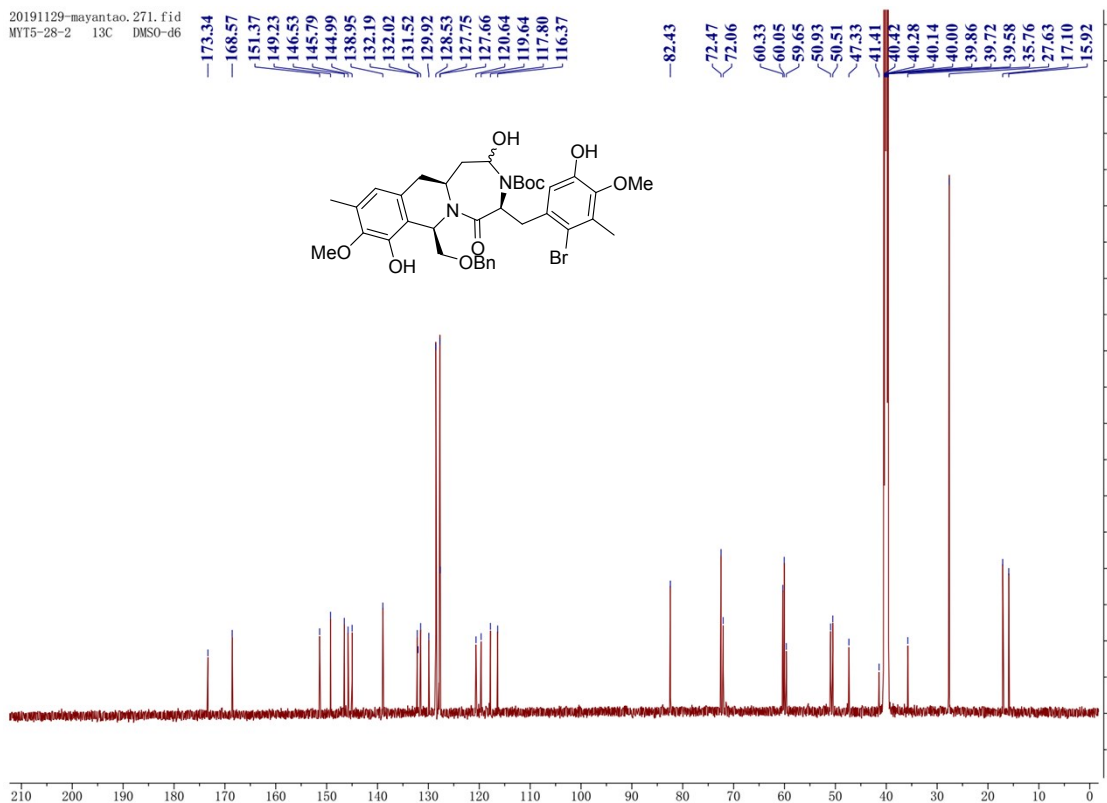

# <sup>1</sup>H NMR of compound 18

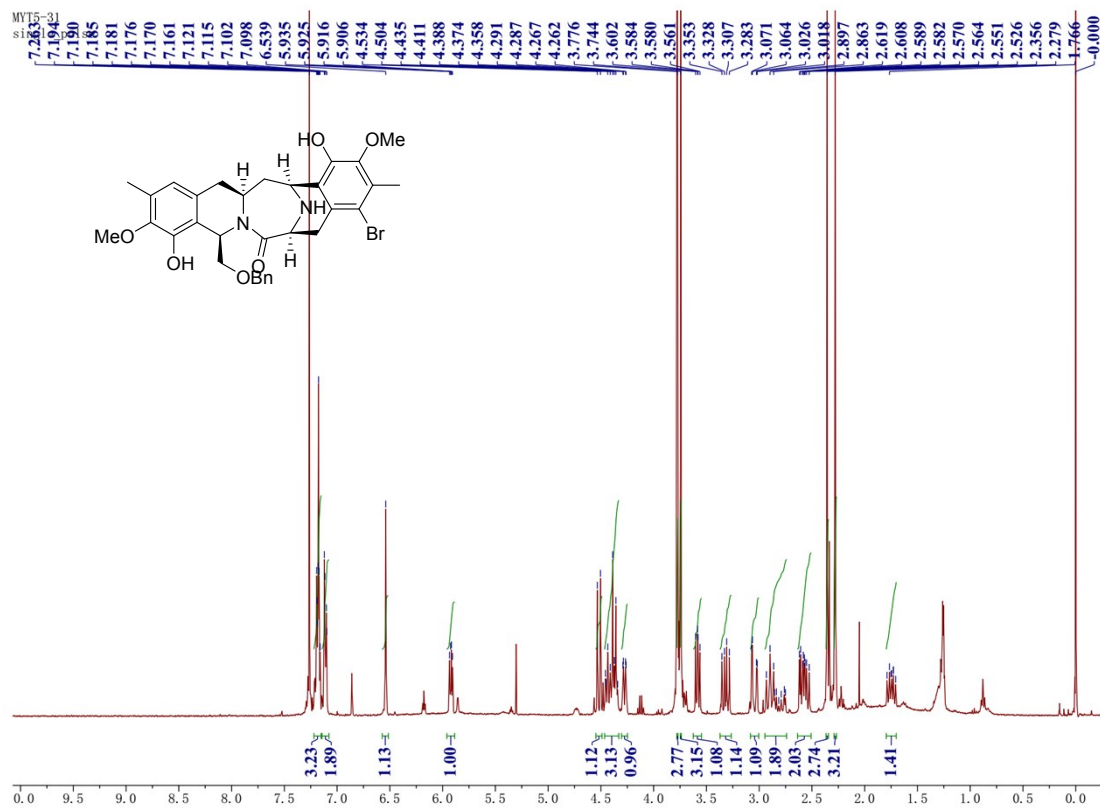

# <sup>13</sup>C NMR of compound 18

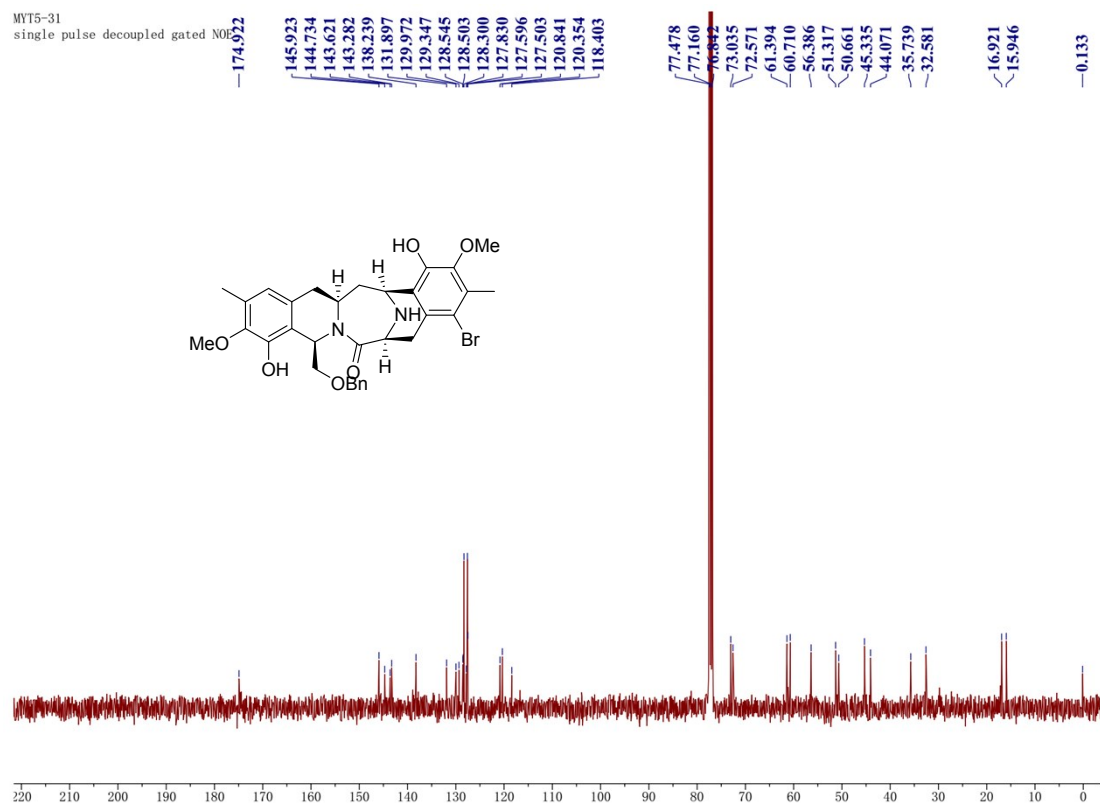



# <sup>1</sup>H NMR of compound 19

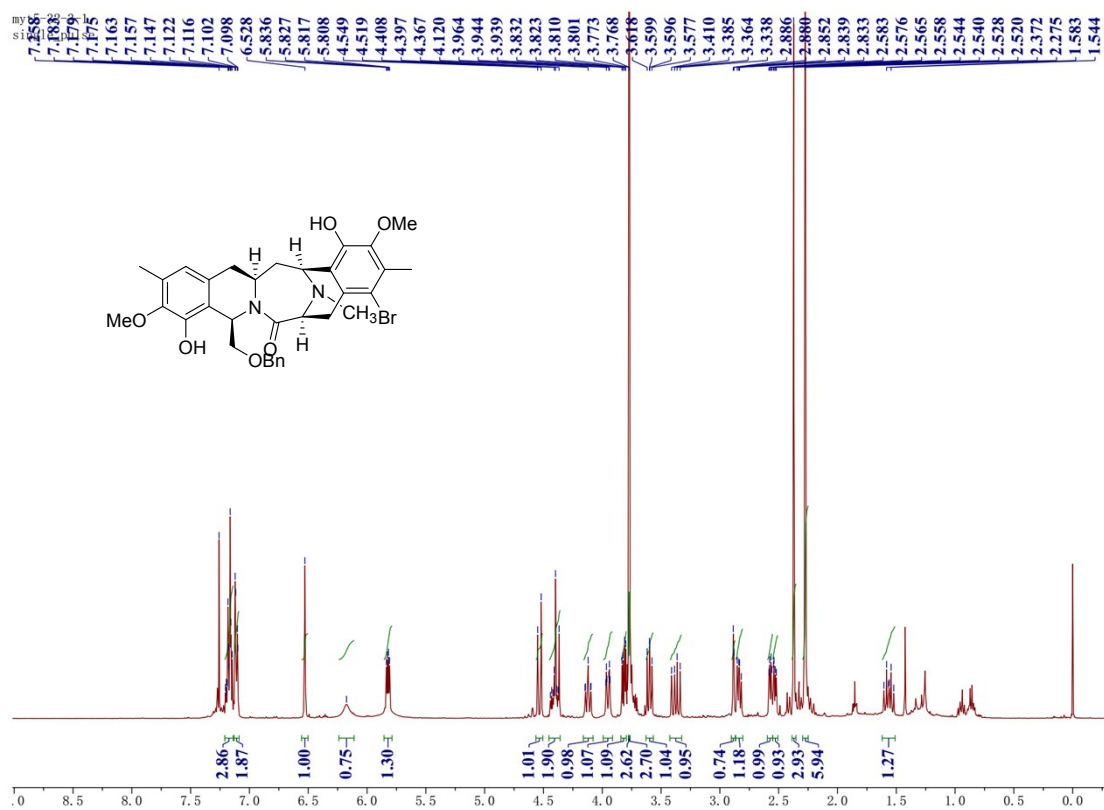

# <sup>13</sup>C NMR of compound 19

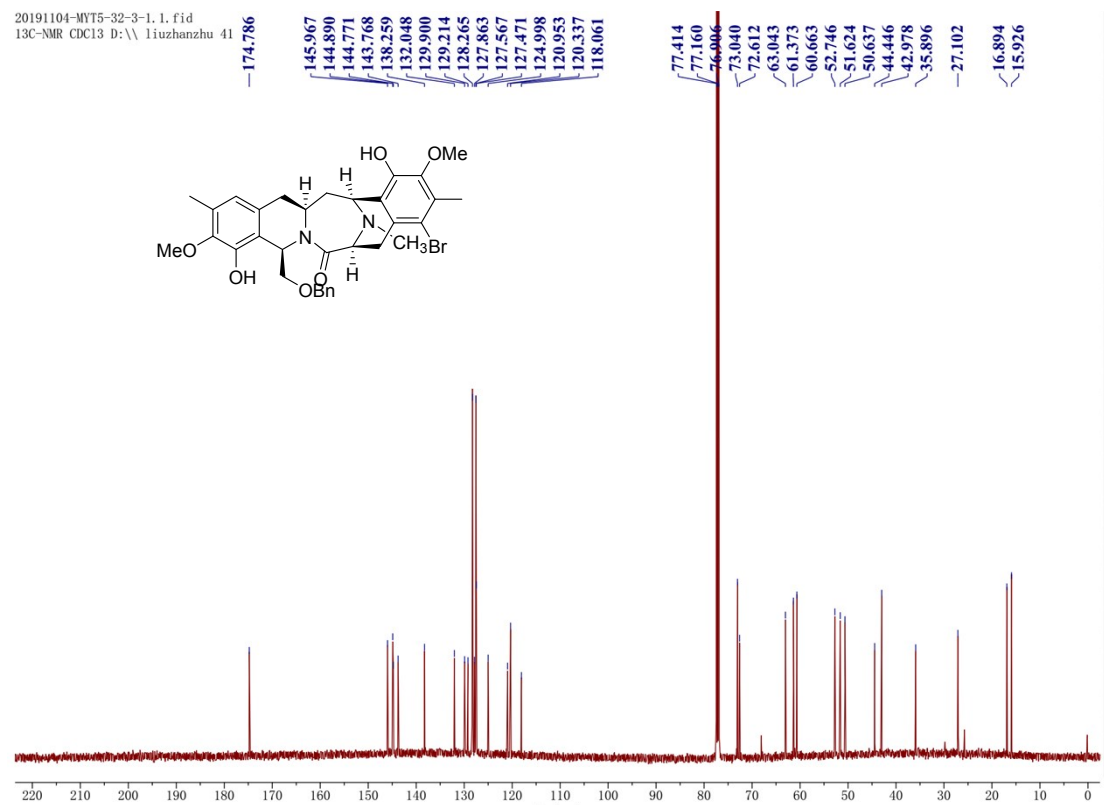

# <sup>1</sup>H NMR of compound 20

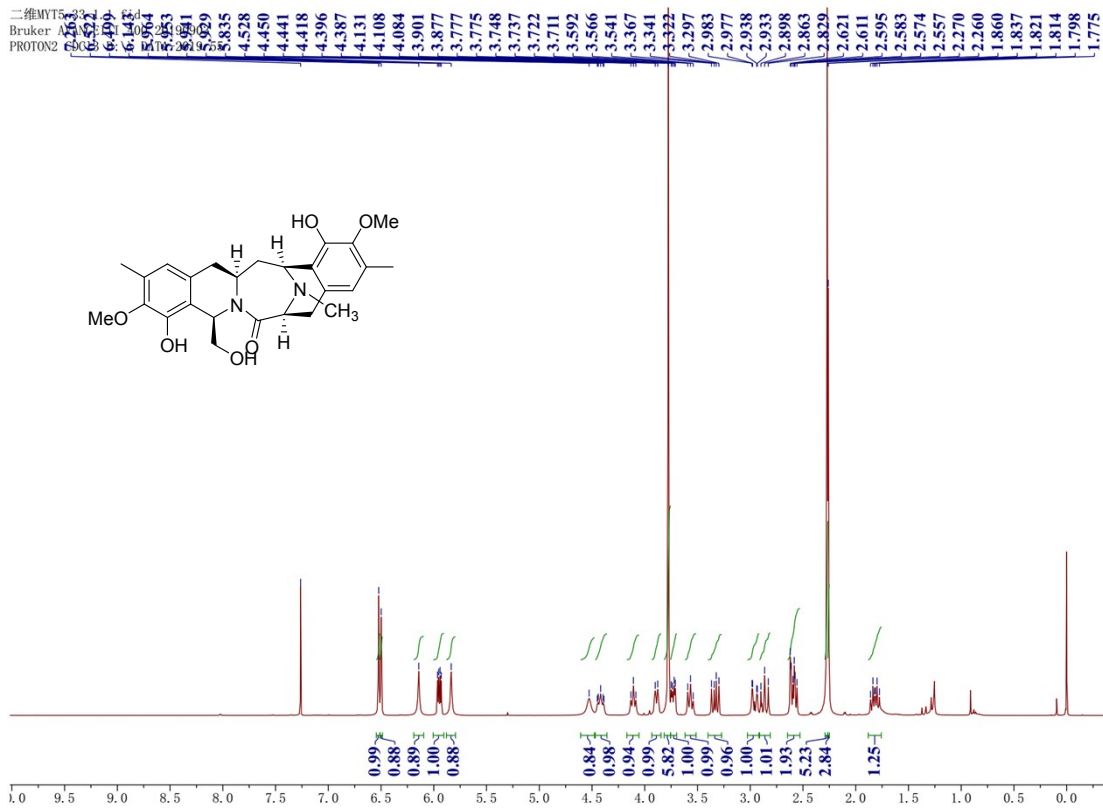

# <sup>13</sup>C NMR of compound 20

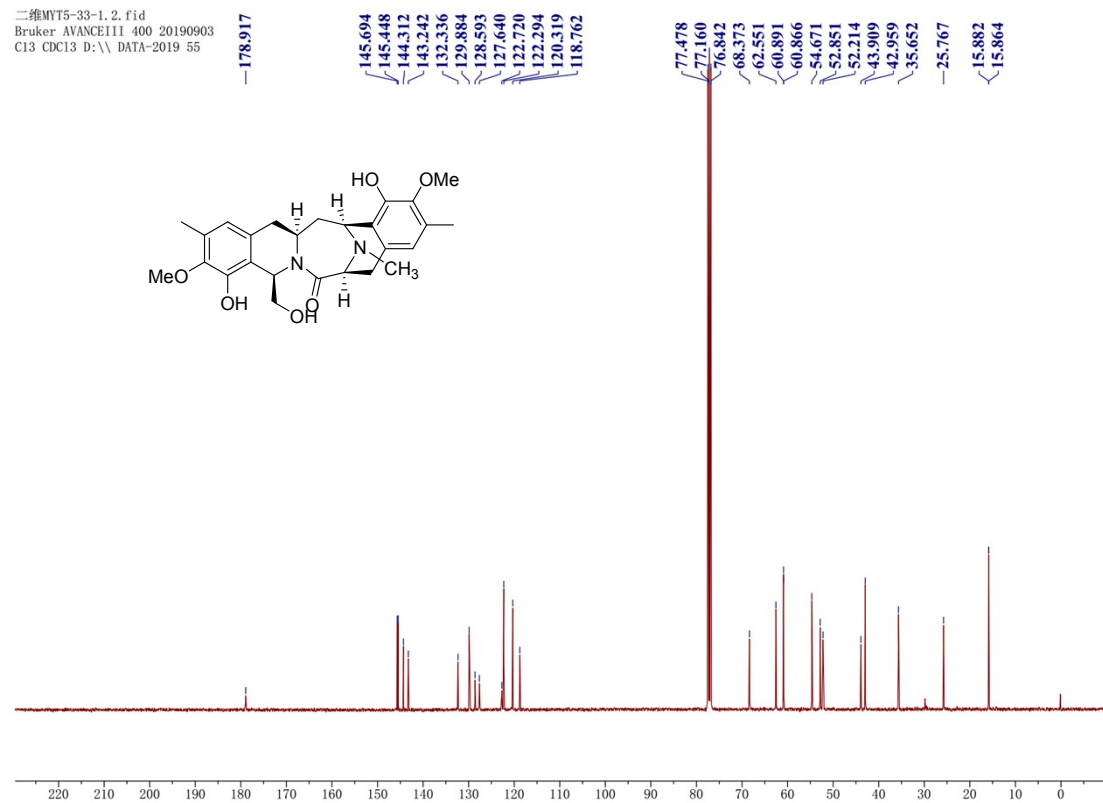

# <sup>1</sup>H NMR of compound 21

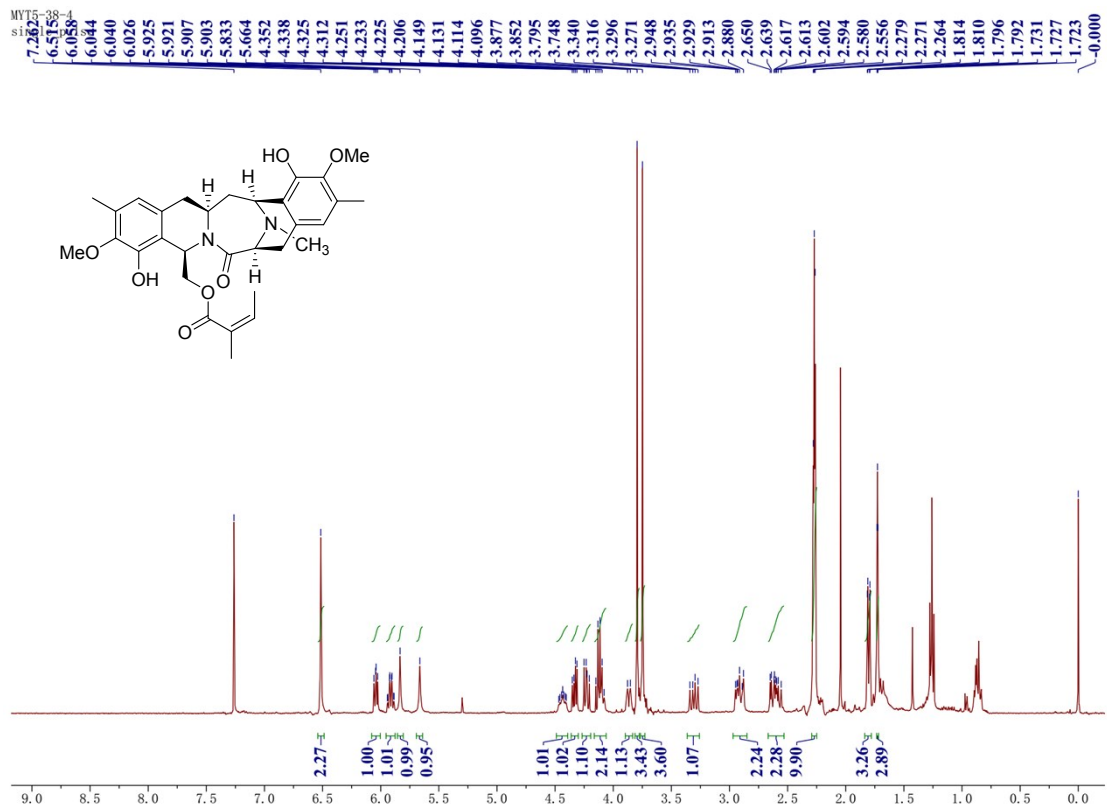

# <sup>13</sup>C NMR of compound 21

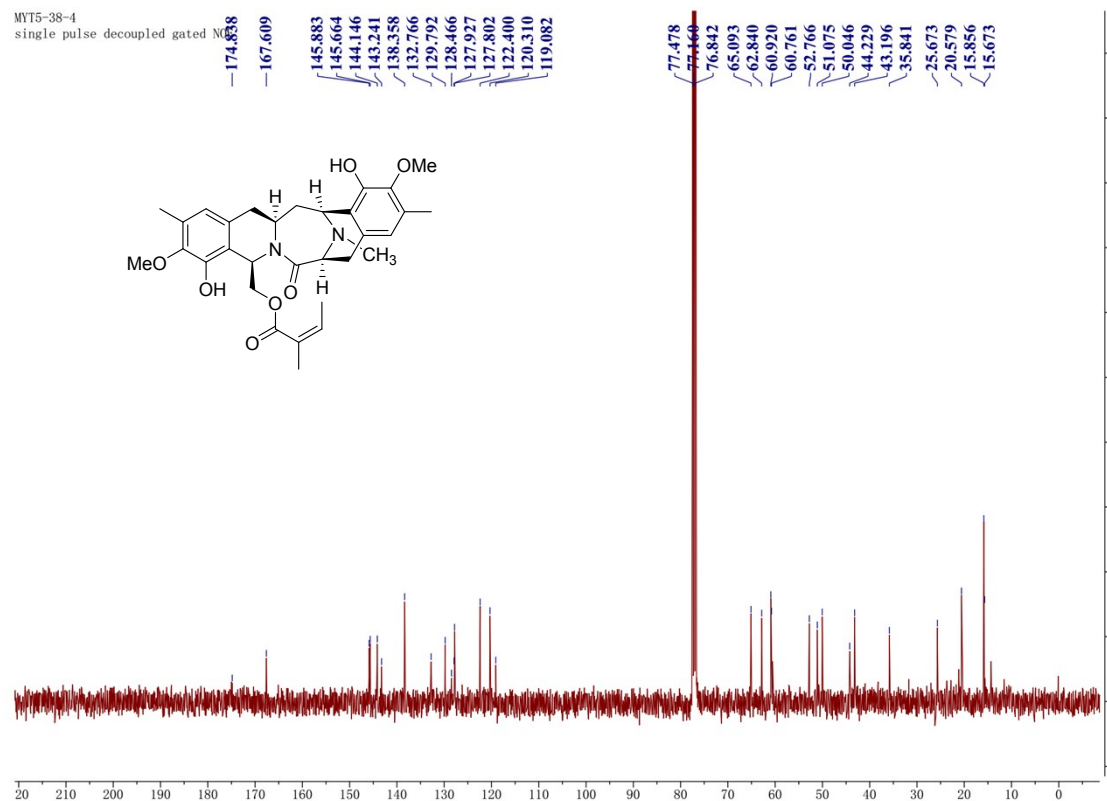

# NOESY of compound 21

MYT5-39-600M/1DNOE-4.55PPM  
MYT5-39-3-1 1-D Selective gradient NOESY experiment 4.55 ppm CDC13

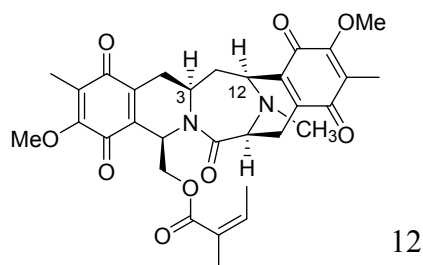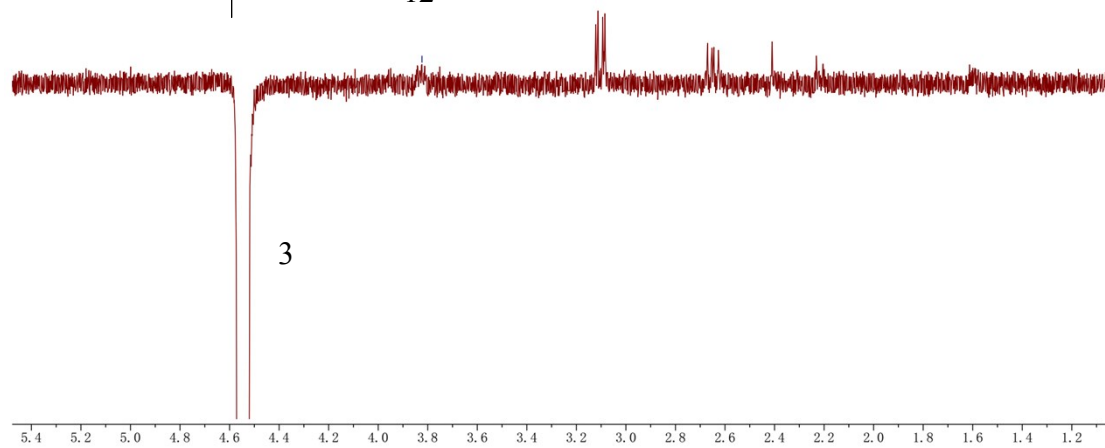

# <sup>1</sup>H,<sup>1</sup>H-COSY of compound 21

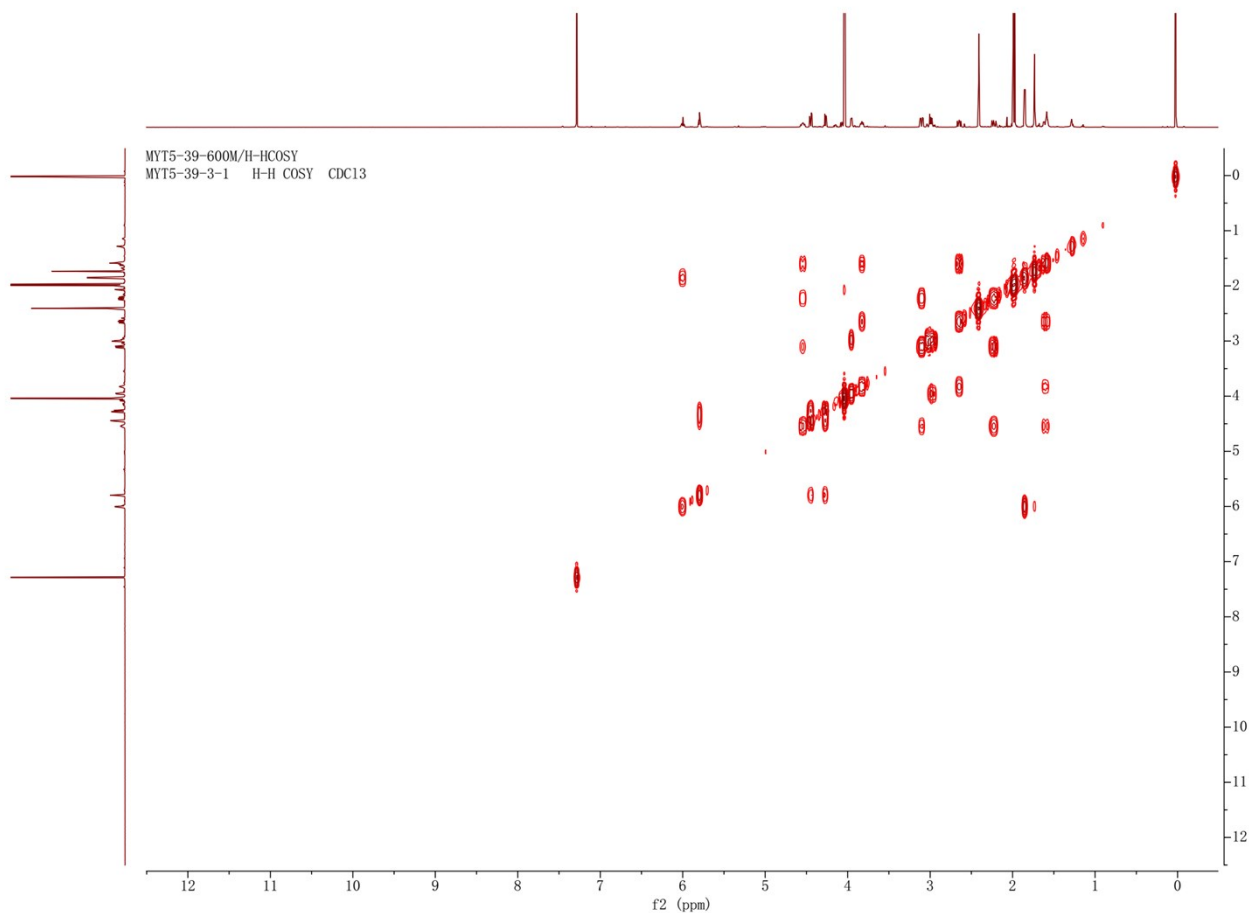

<sup>1</sup>H NMR of compound **22**

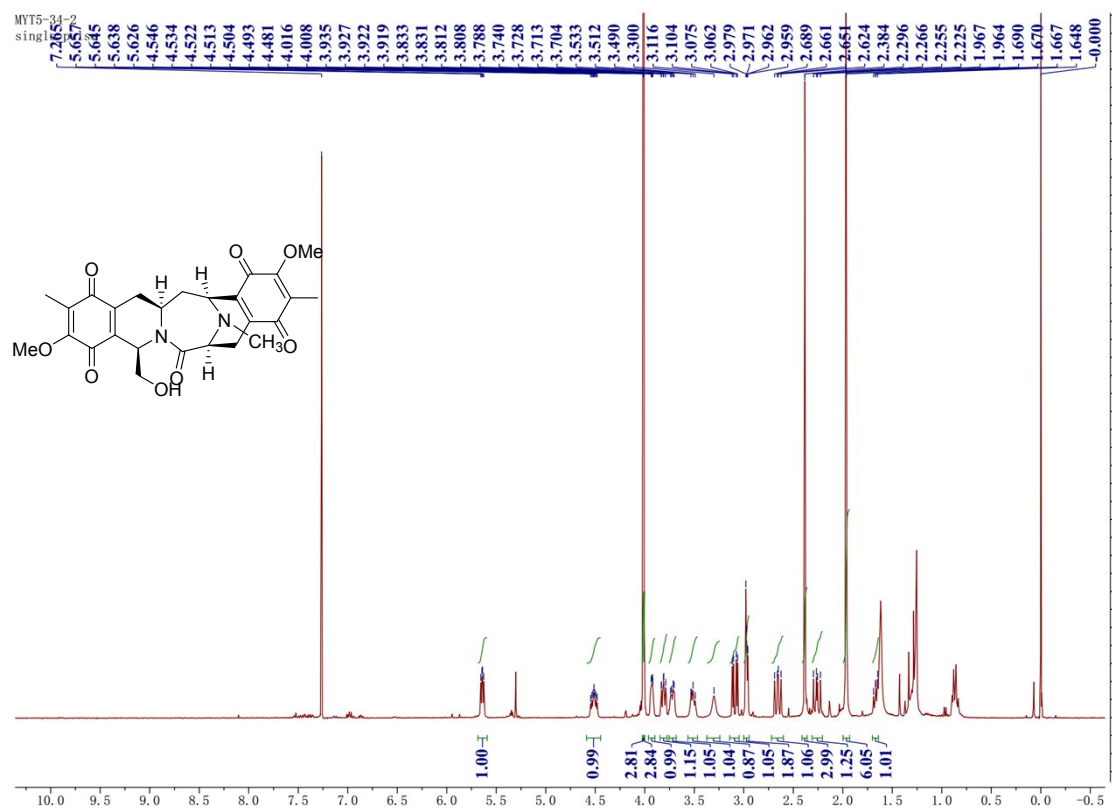

<sup>13</sup>C NMR of compound **22**

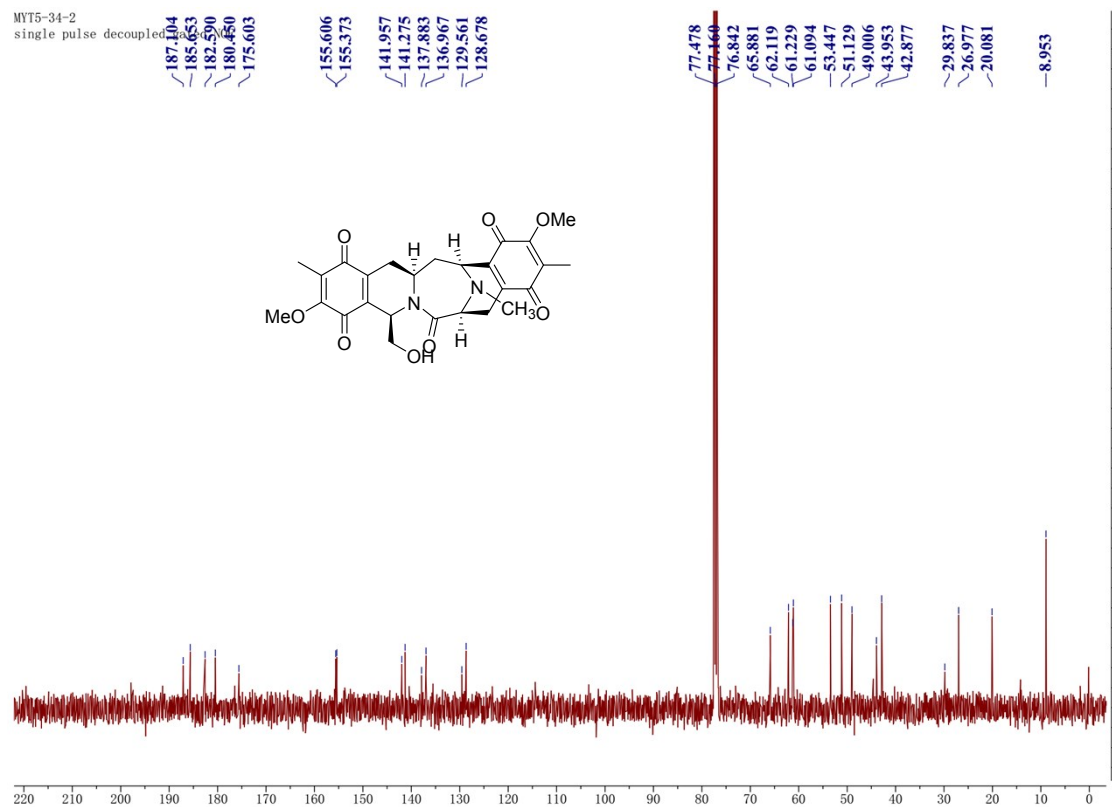

### <sup>1</sup>H NMR of compound 23

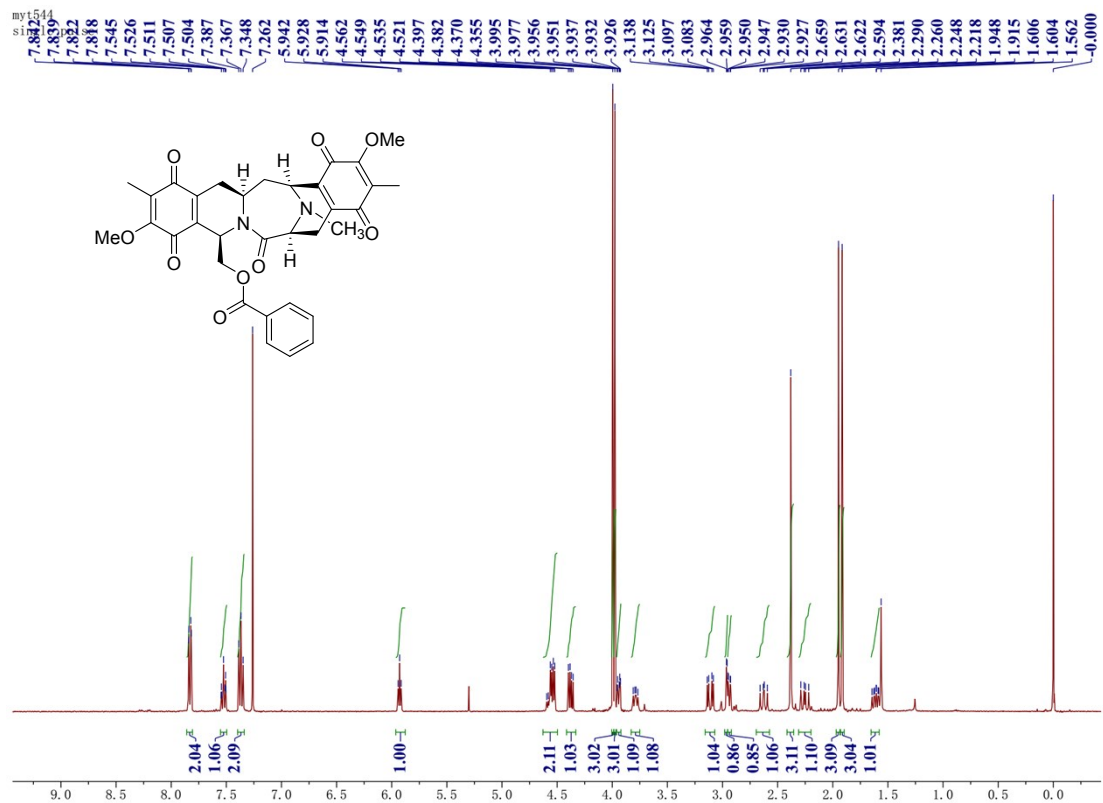

### <sup>13</sup>C NMR of compound 23

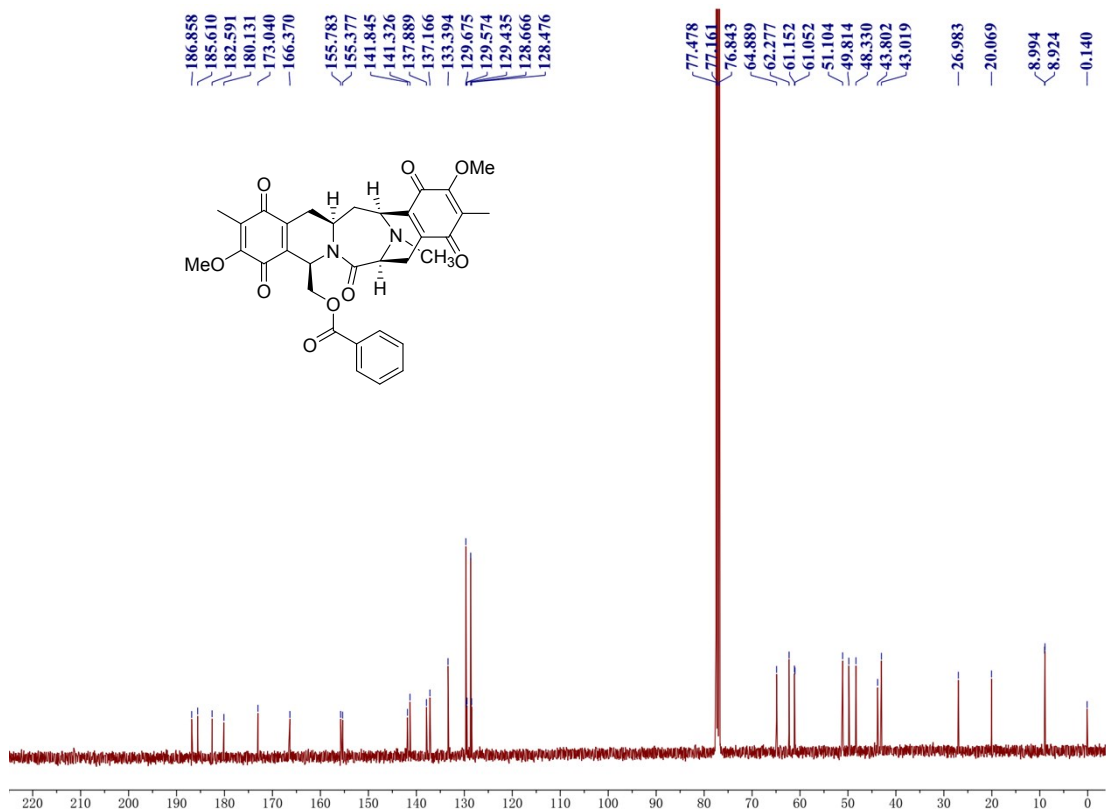

### <sup>1</sup>H NMR of compound 24

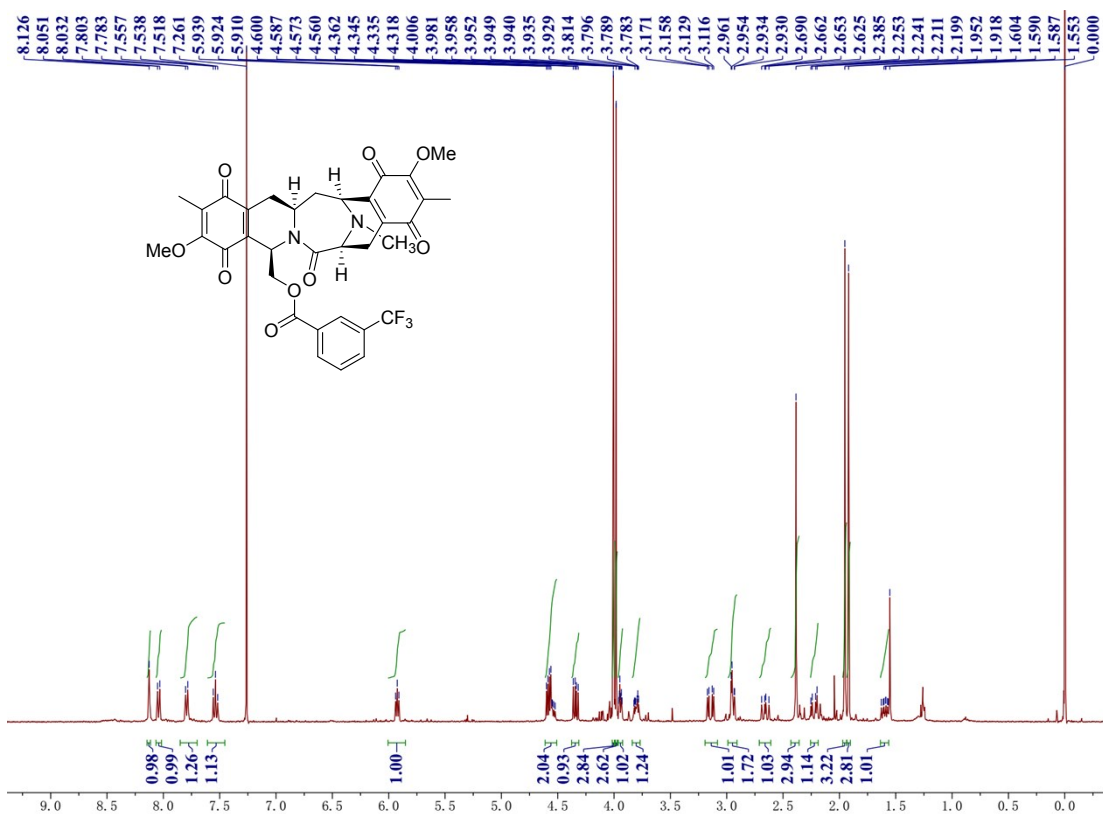

### <sup>13</sup>C NMR of compound 24

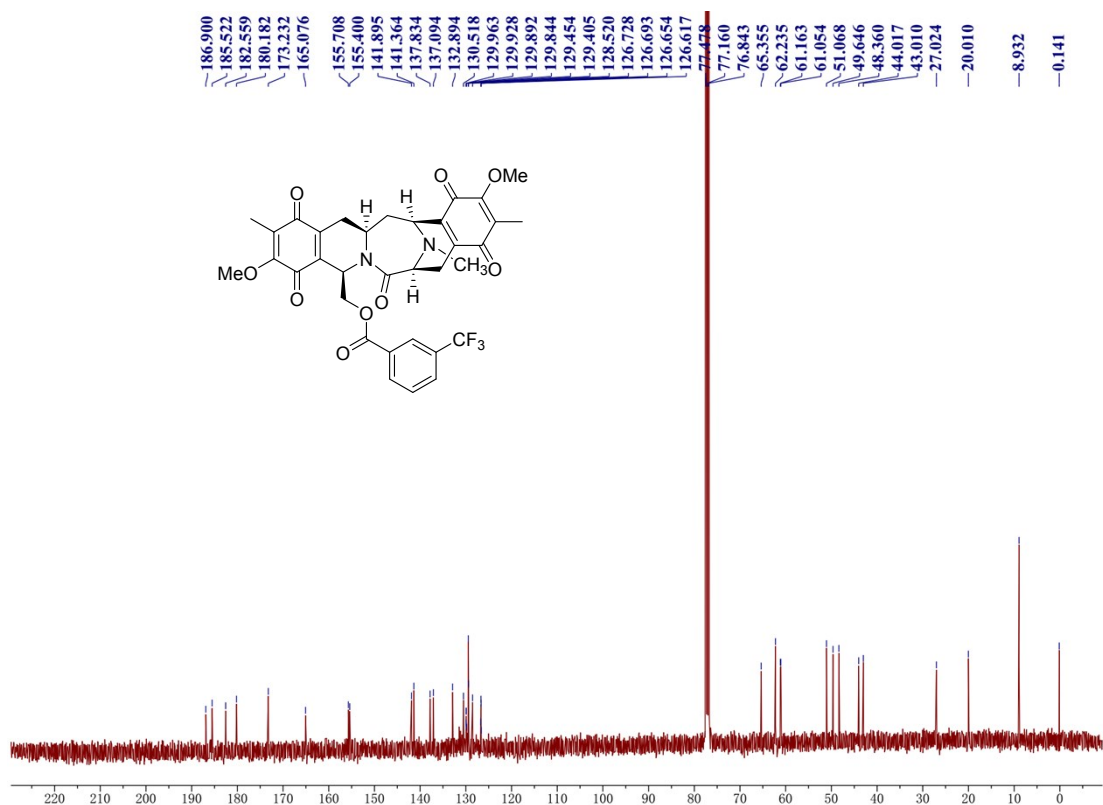

# <sup>1</sup>H NMR of compound 25

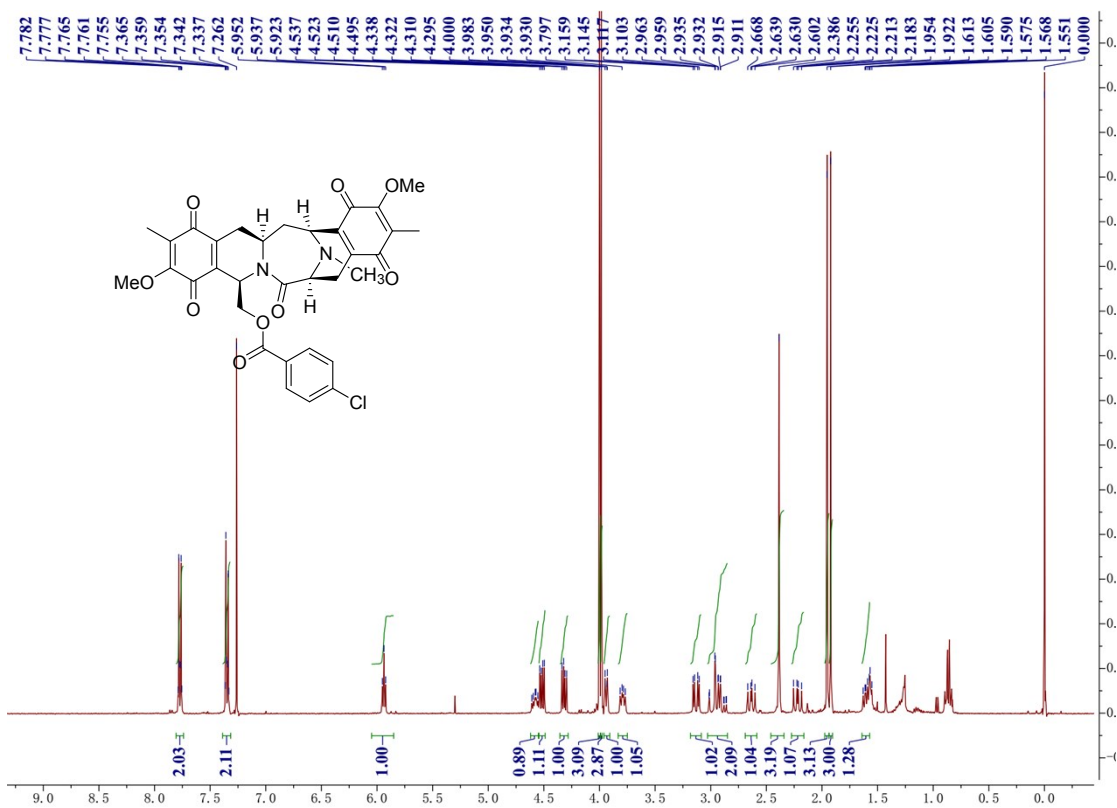

# <sup>13</sup>C NMR of compound 25

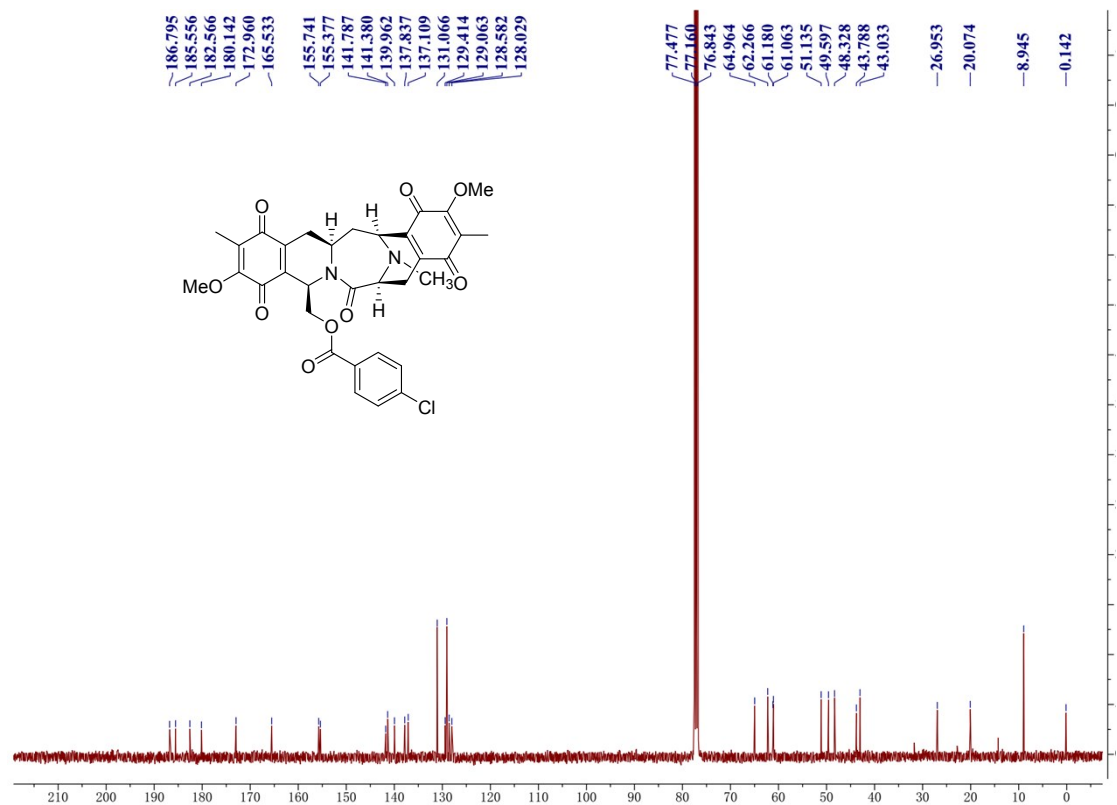



### <sup>1</sup>H NMR of compound 26

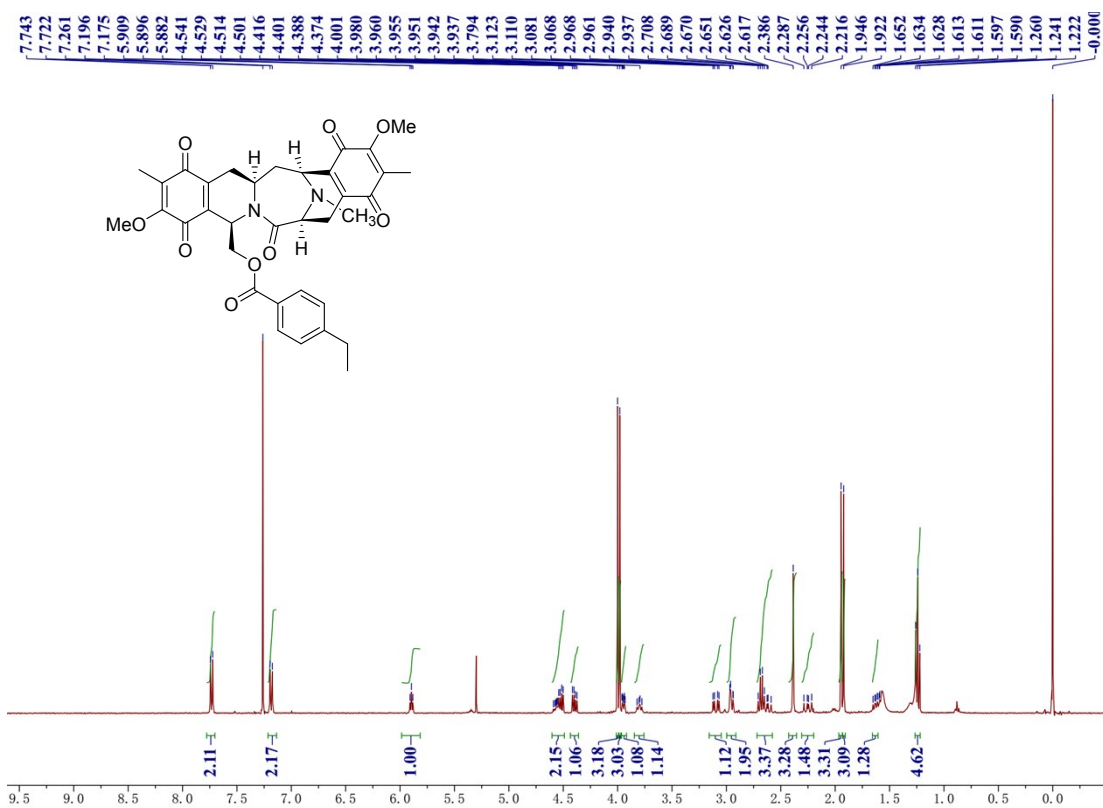

### <sup>13</sup>C NMR of compound 26

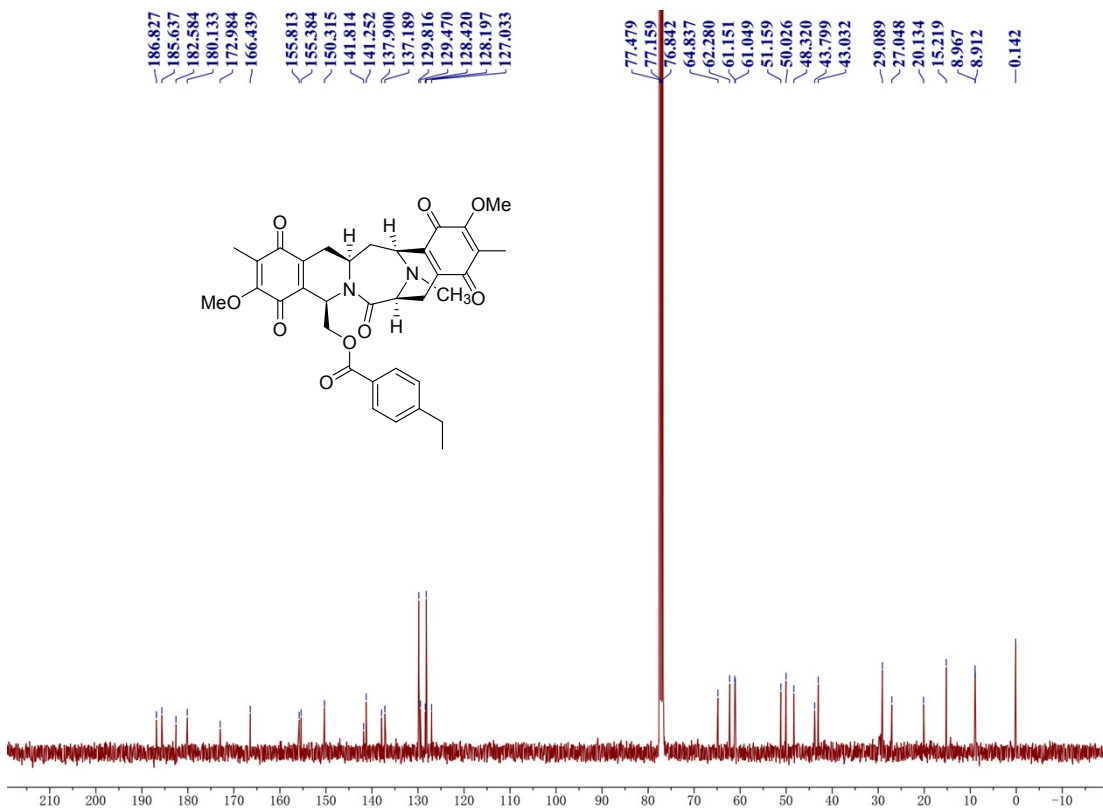

# <sup>1</sup>H NMR of compound 27

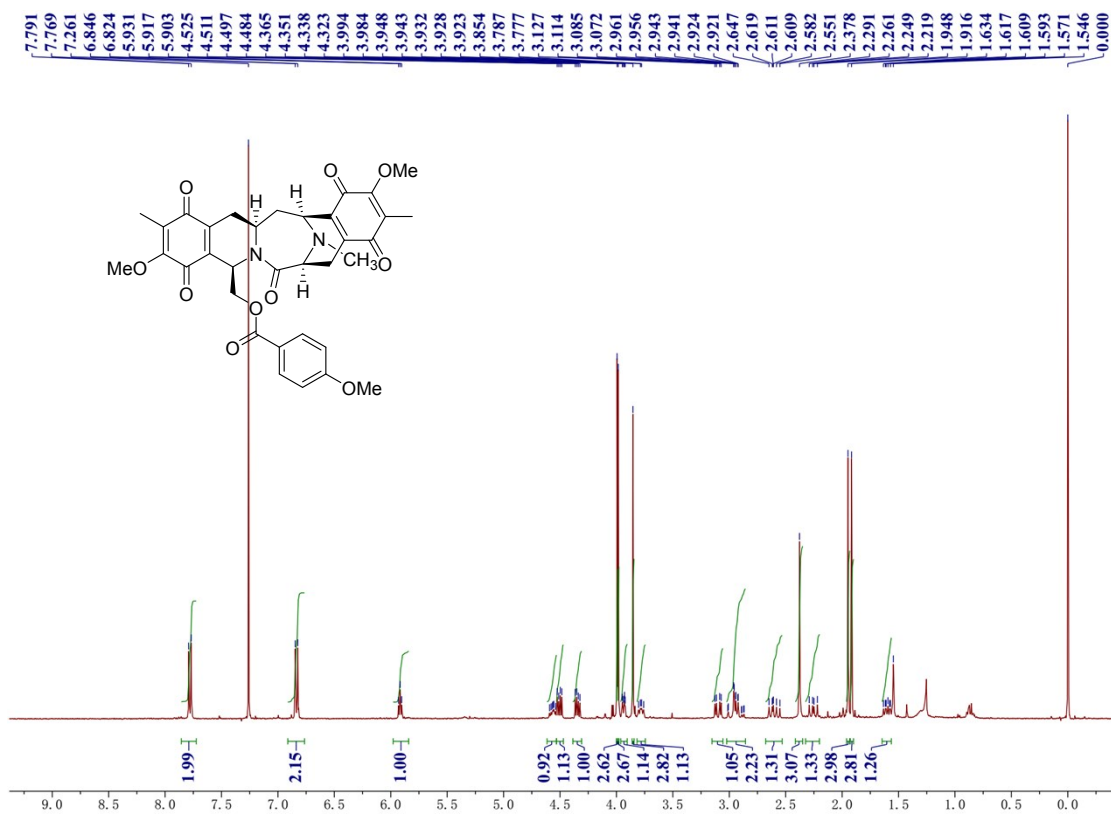

# <sup>13</sup>C NMR of compound 27

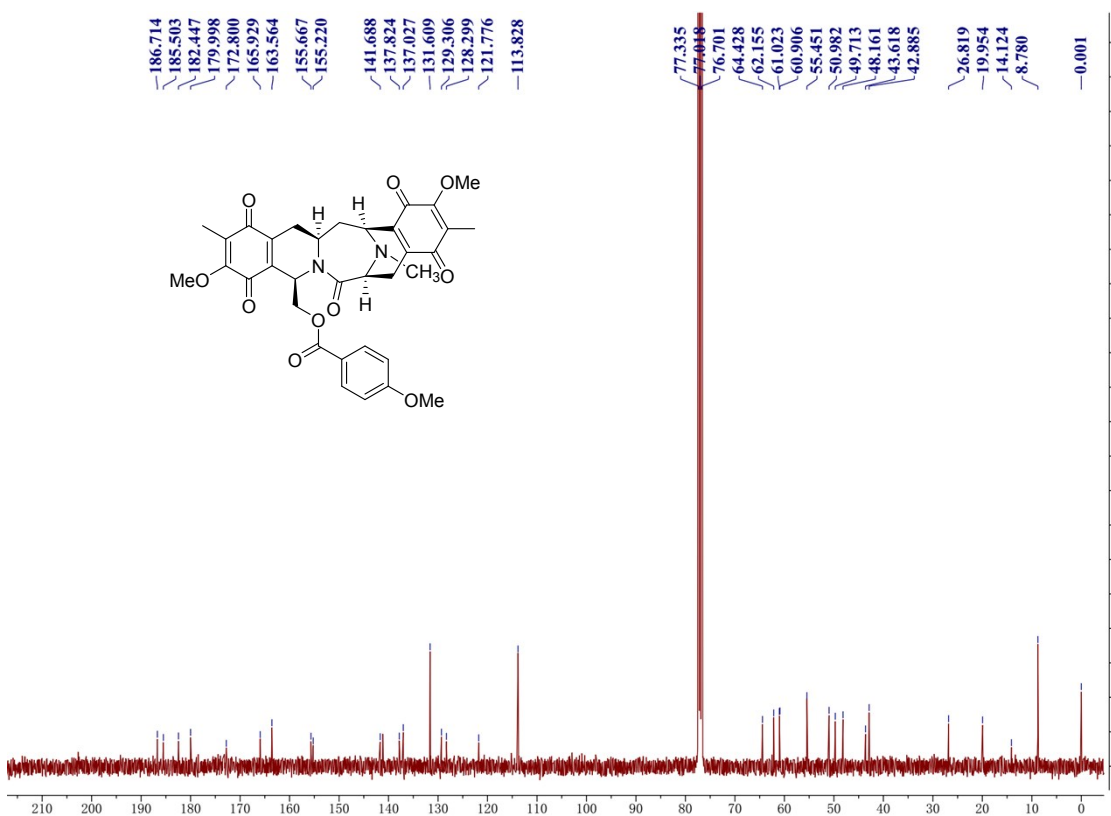

# <sup>1</sup>H NMR of compound 28

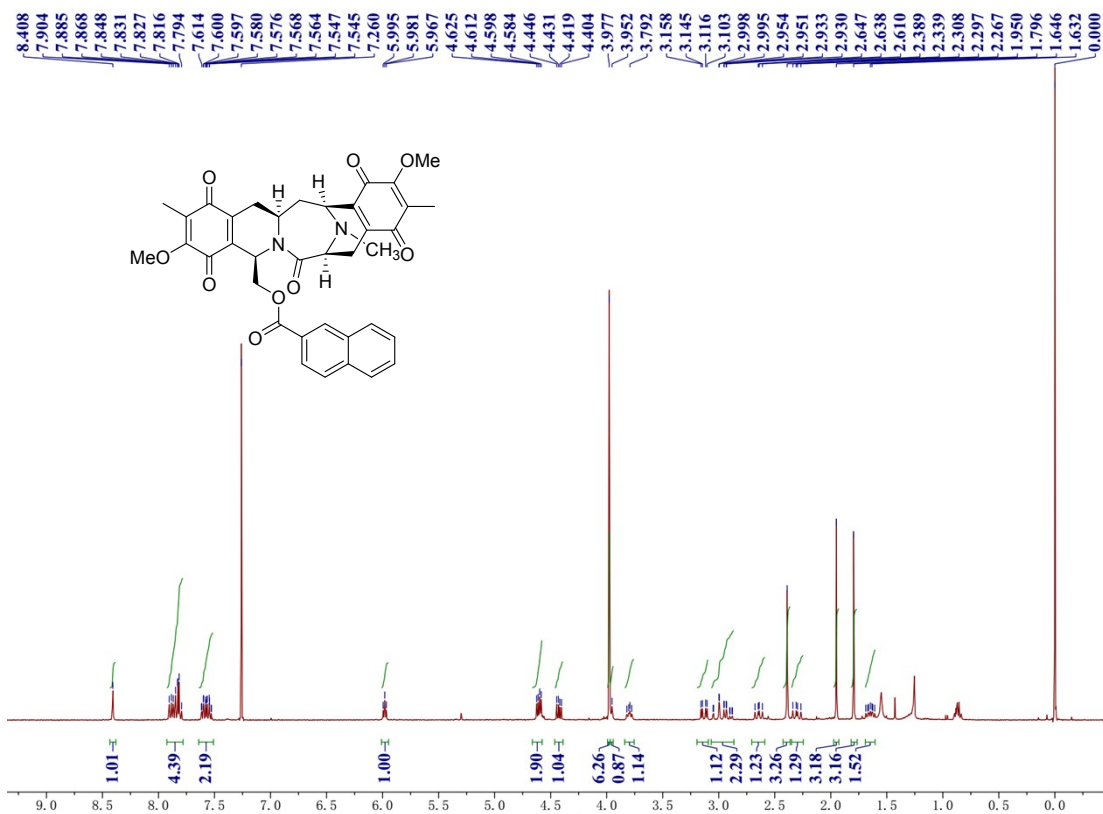

# <sup>13</sup>C NMR of compound 28

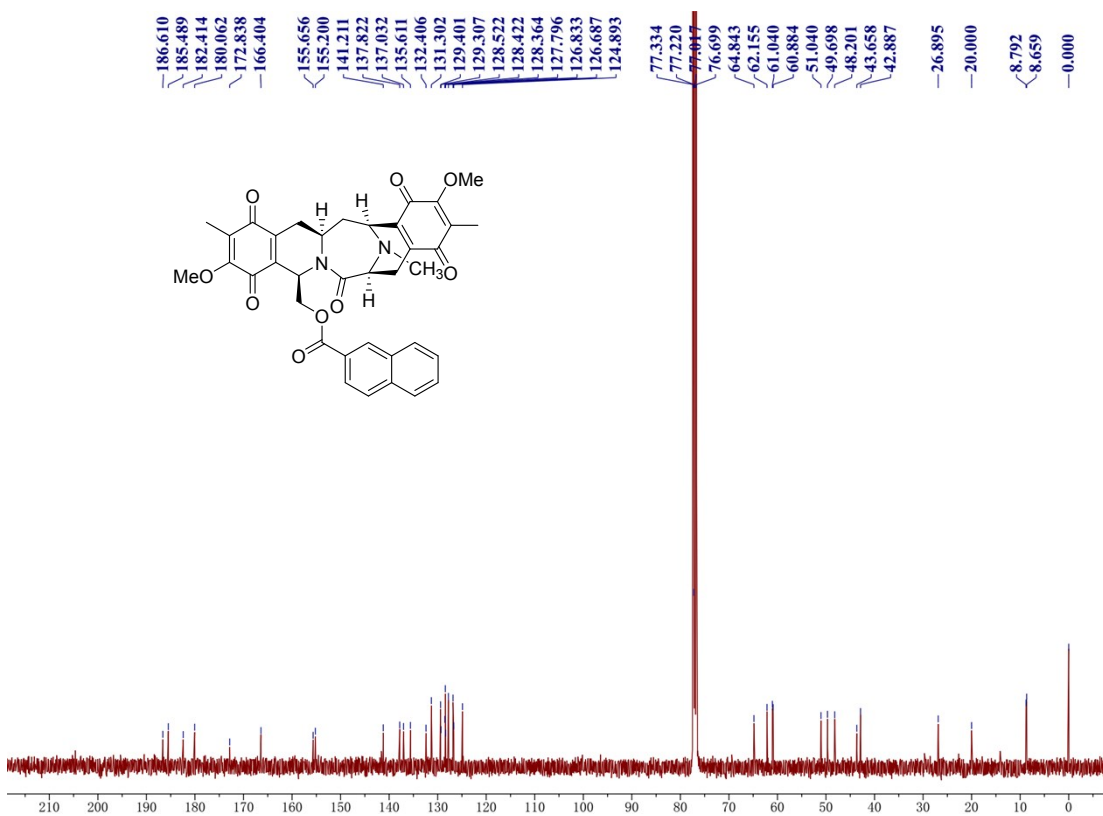

# <sup>1</sup>H NMR of compound 29

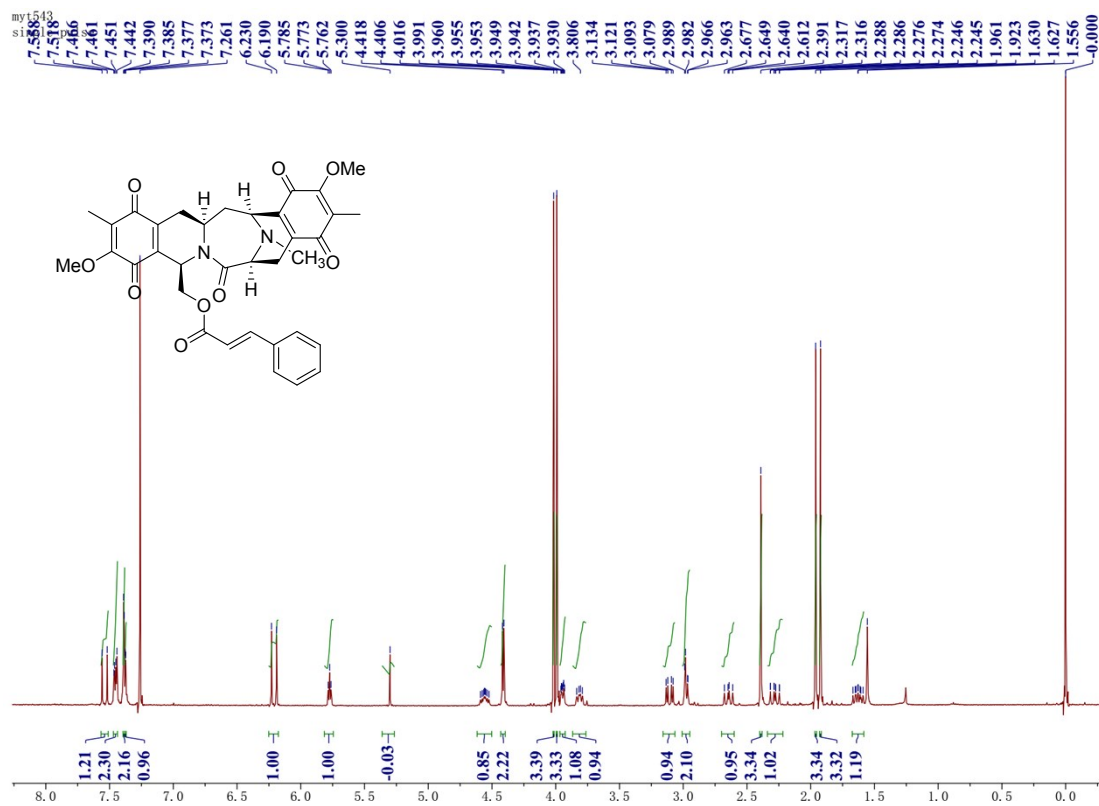

# <sup>13</sup>C NMR of compound 29

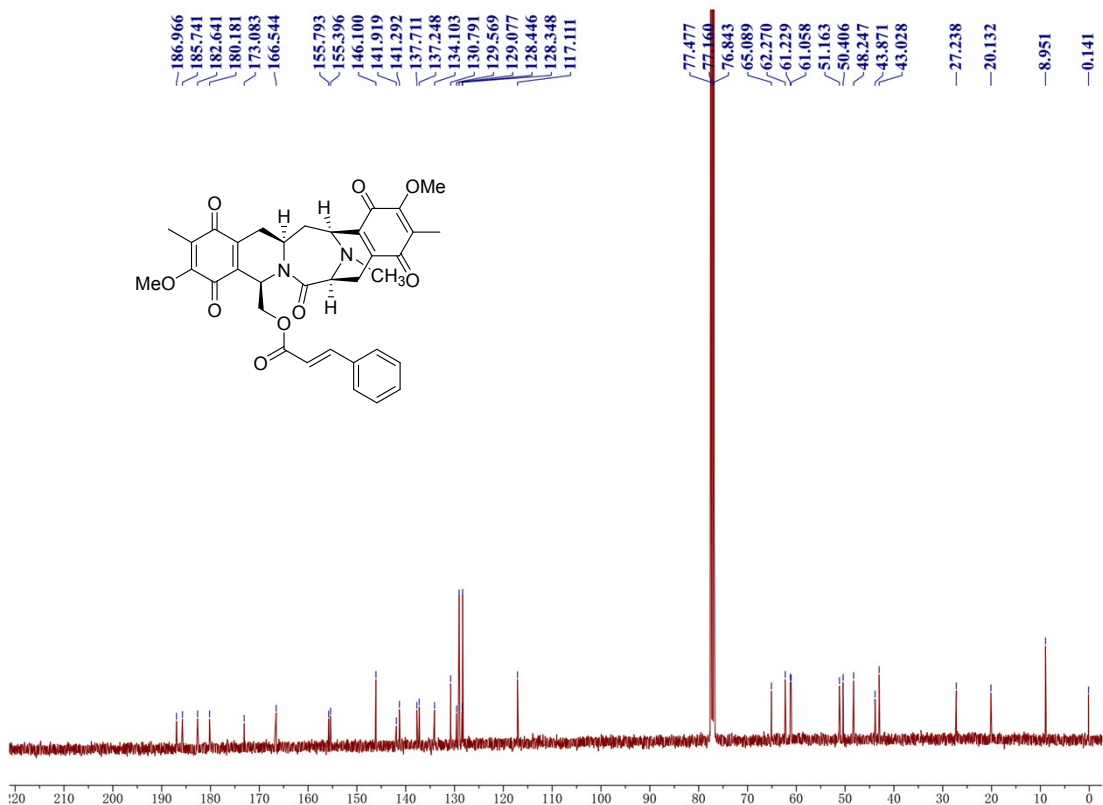

<sup>1</sup>H NMR of compound 30

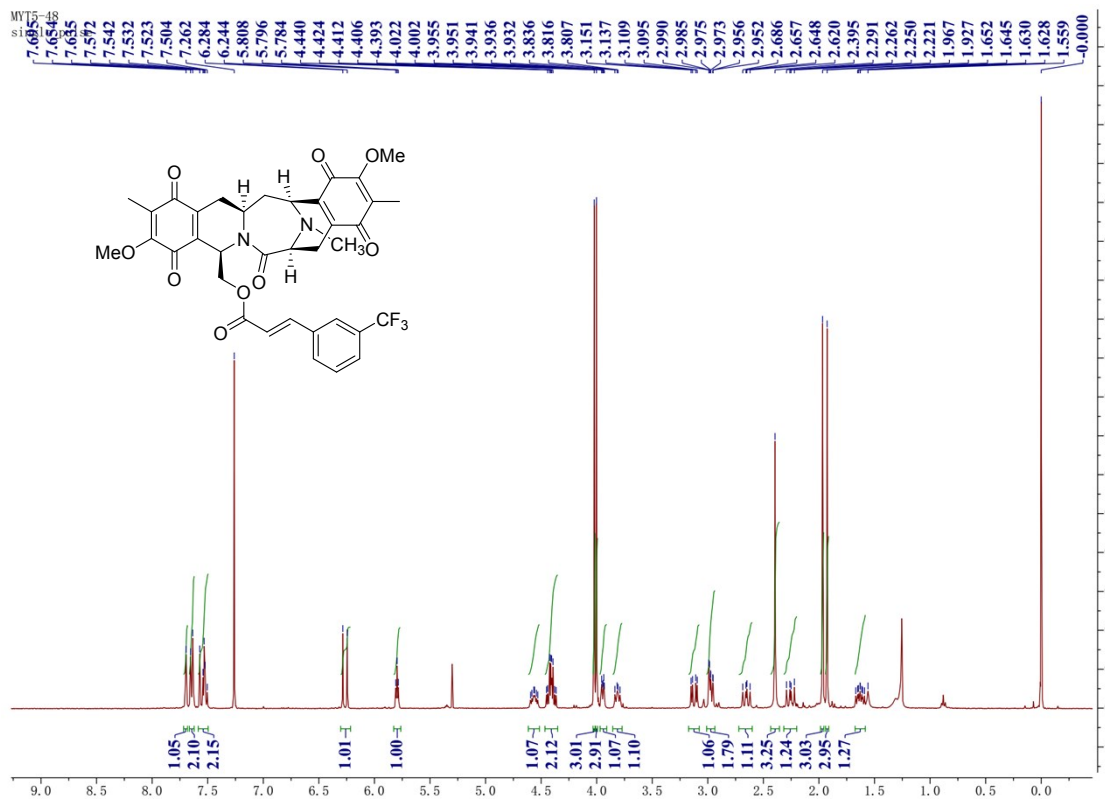

<sup>13</sup>C NMR of compound 30

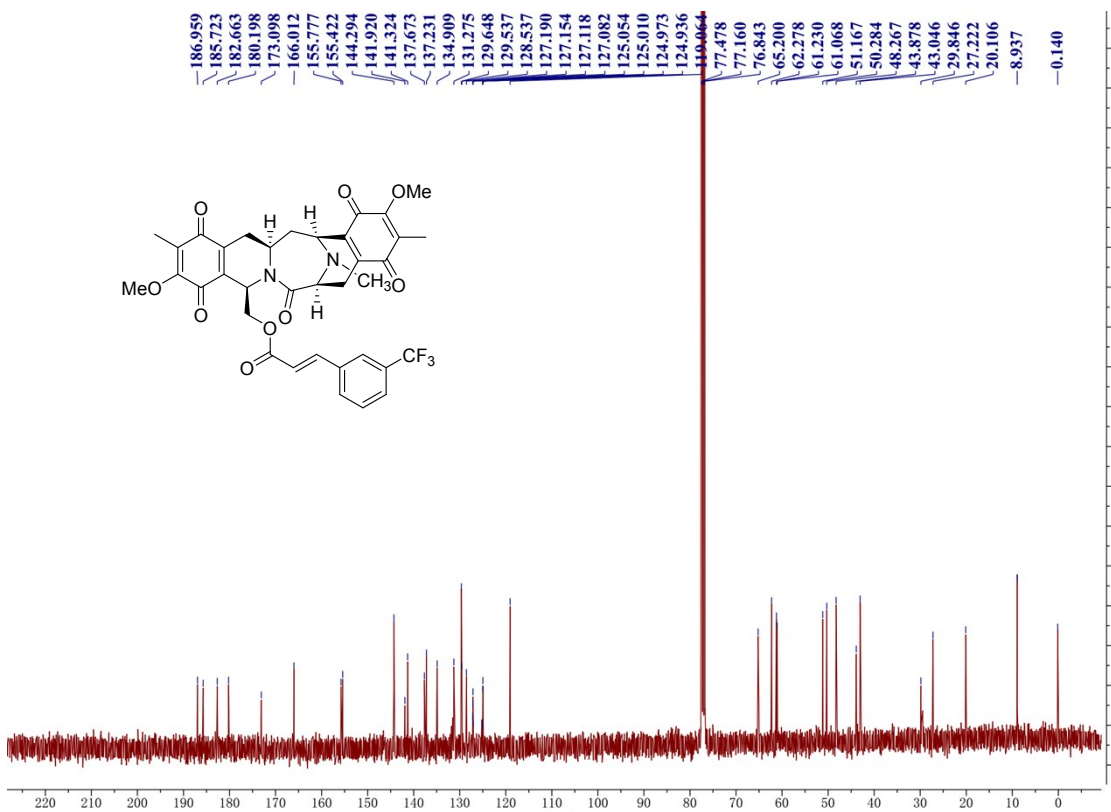

### <sup>1</sup>H NMR of compound 31

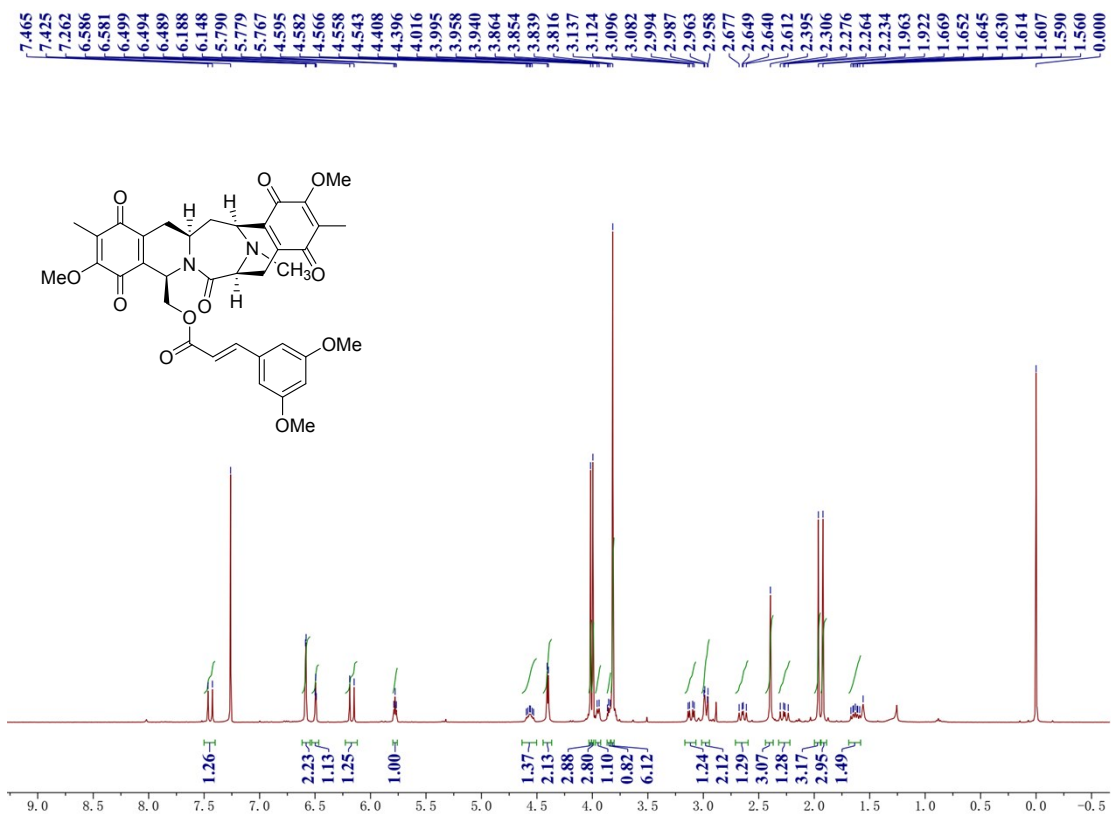

### <sup>13</sup>C NMR of compound 31

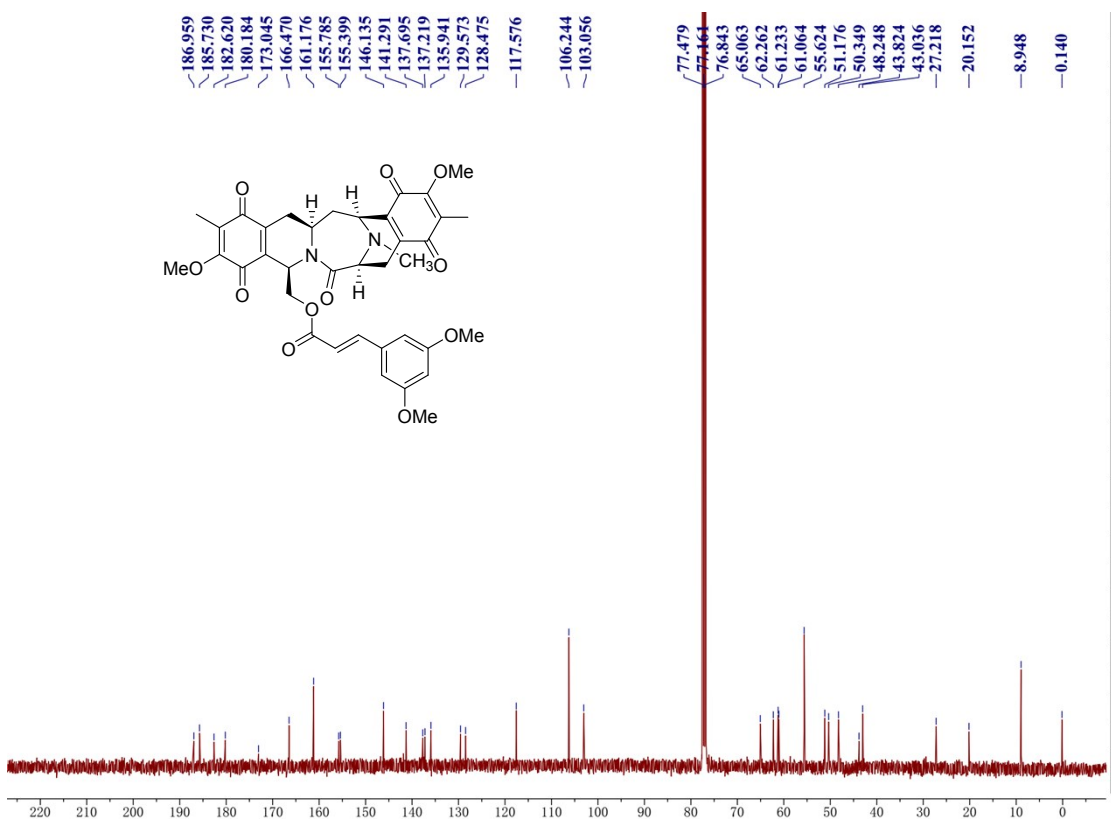

<sup>1</sup>H NMR of compound 32

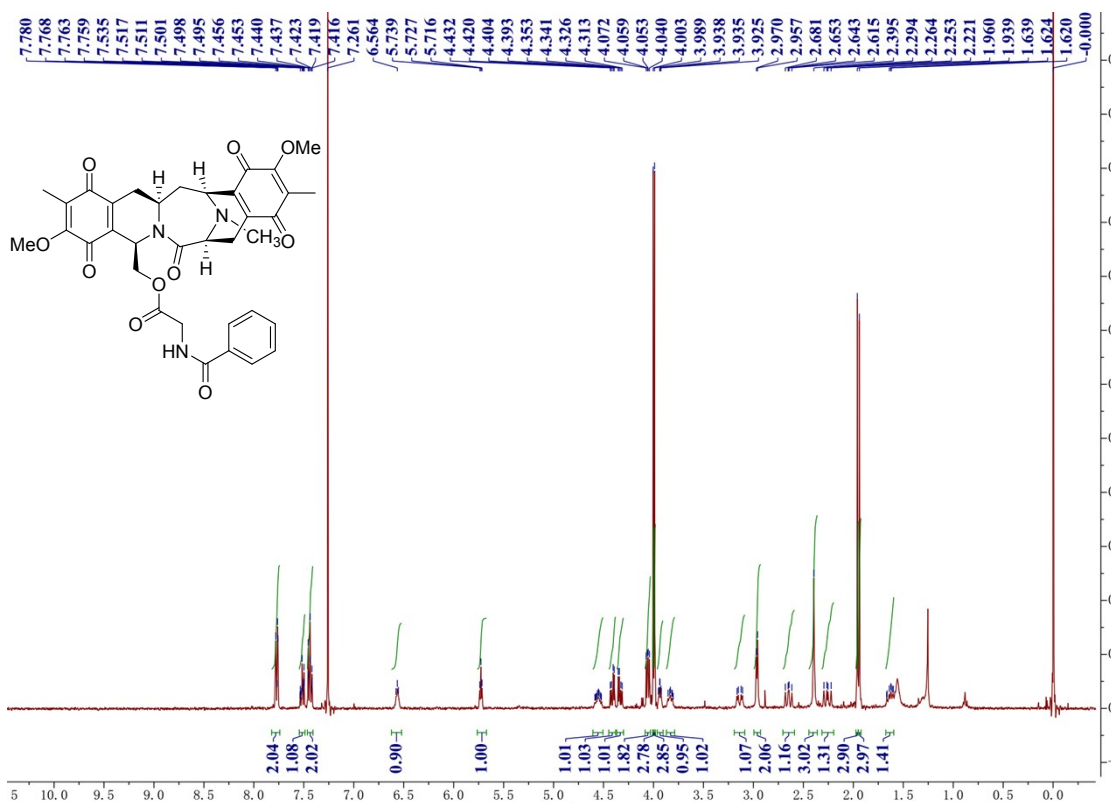

<sup>13</sup>C NMR of compound 32

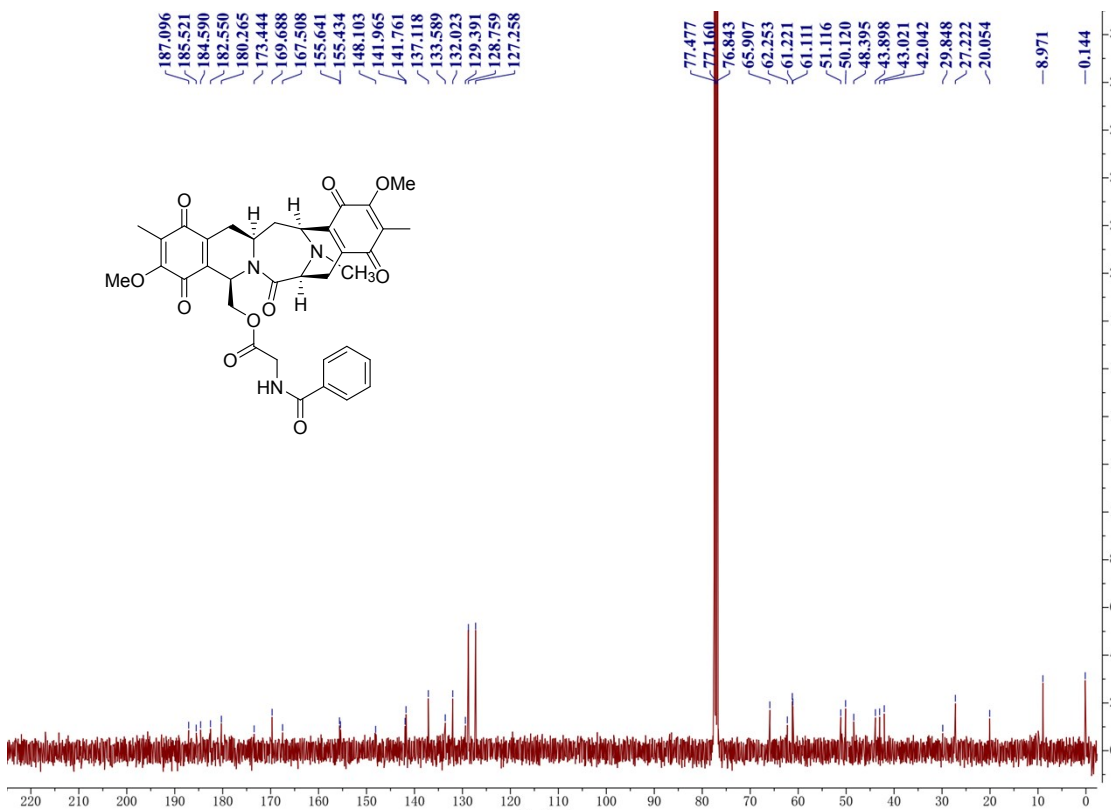

### <sup>1</sup>H NMR of compound 33

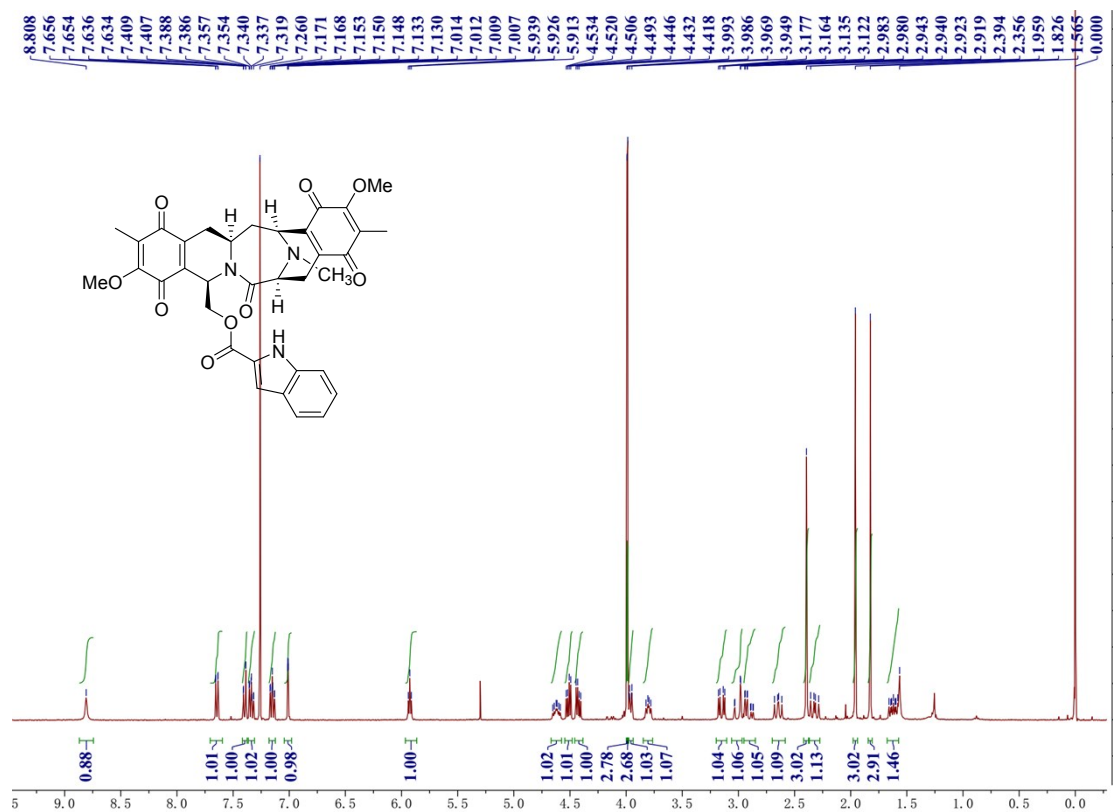

### <sup>13</sup>C NMR of compound 33

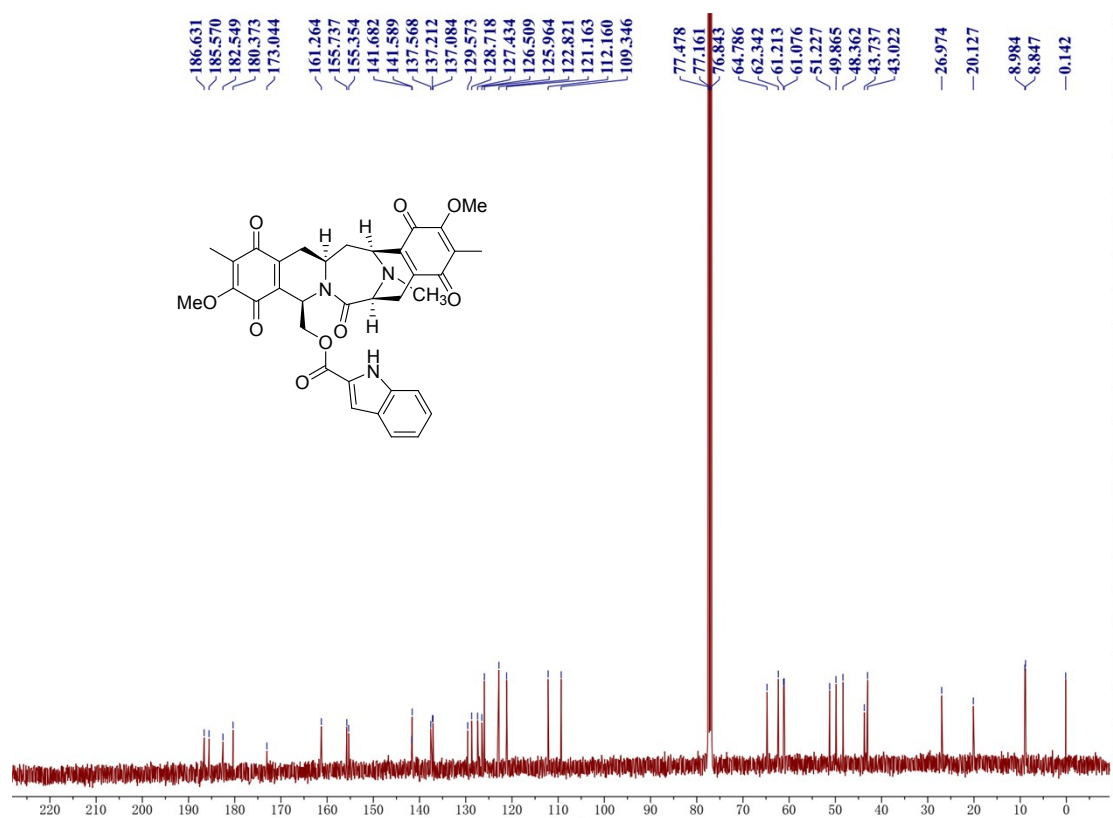



### <sup>1</sup>H NMR of compound 34

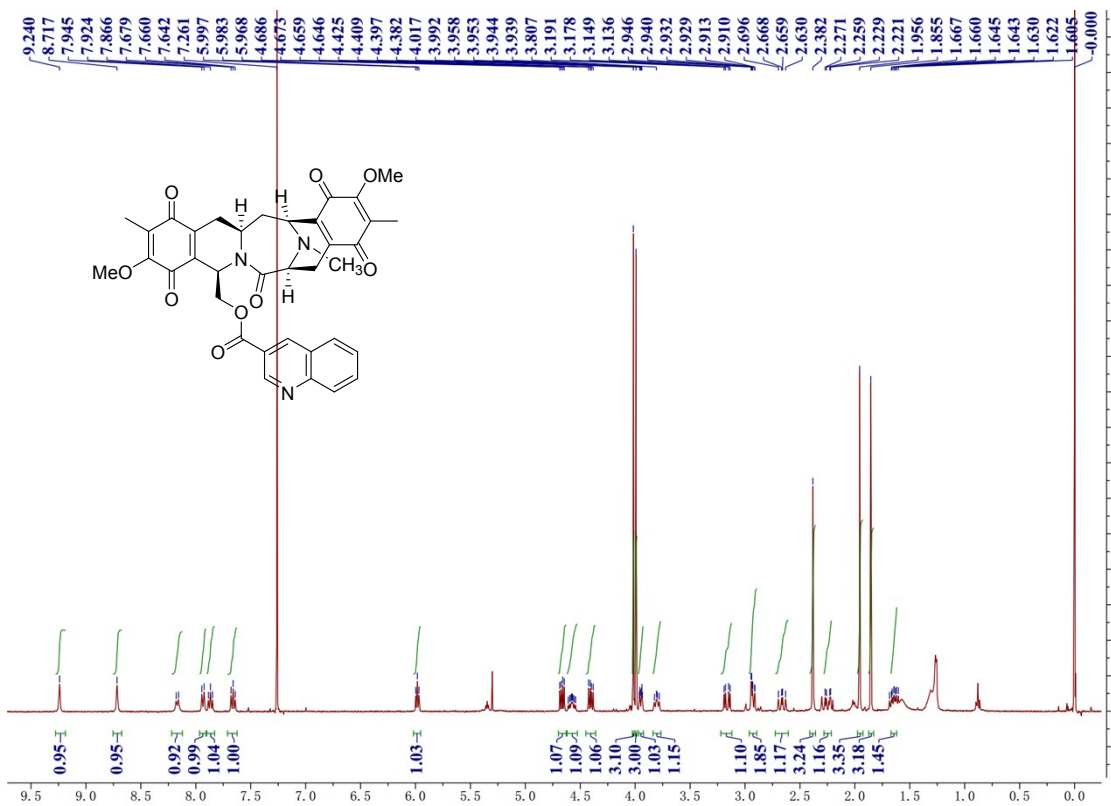

### <sup>13</sup>C NMR of compound 34

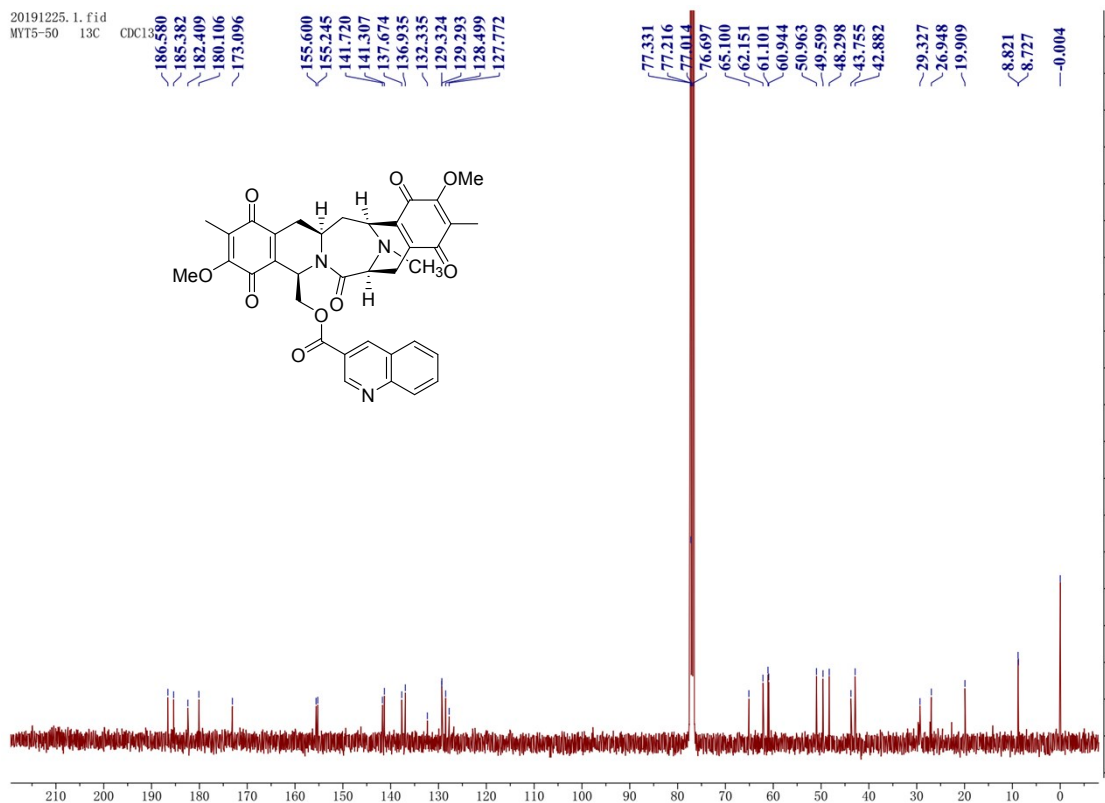

### <sup>1</sup>H NMR of compound 35

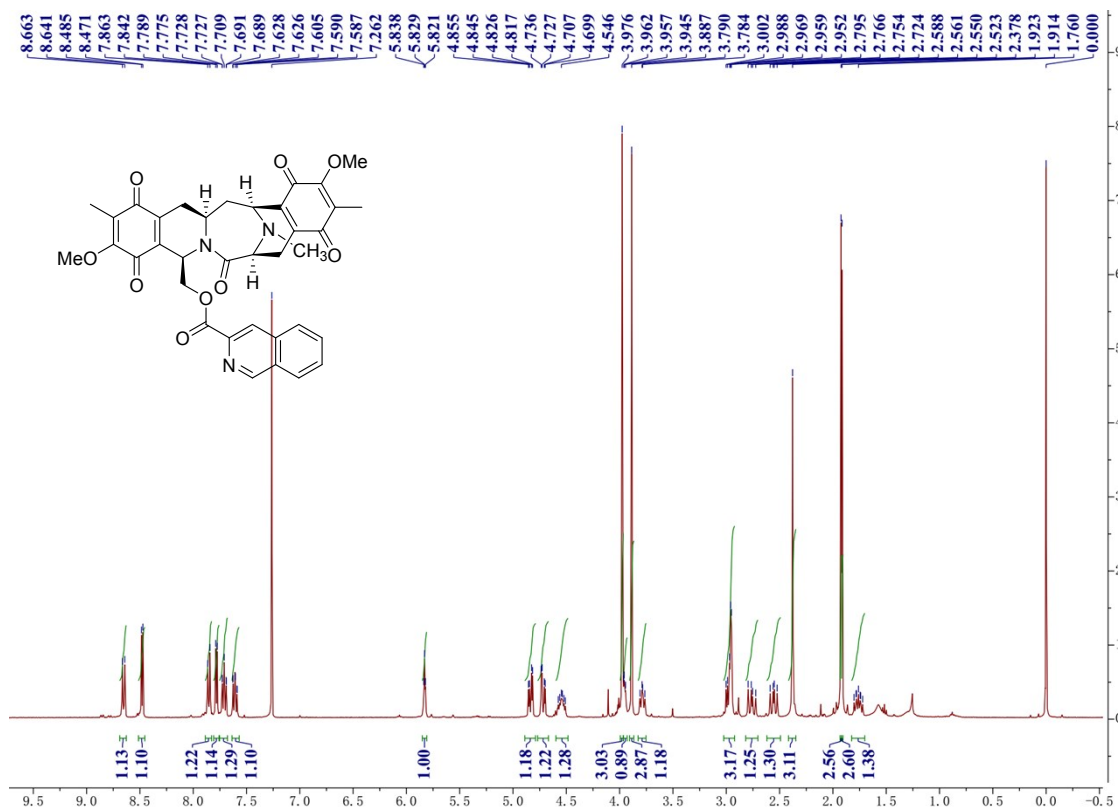

### <sup>13</sup>C NMR of compound 35

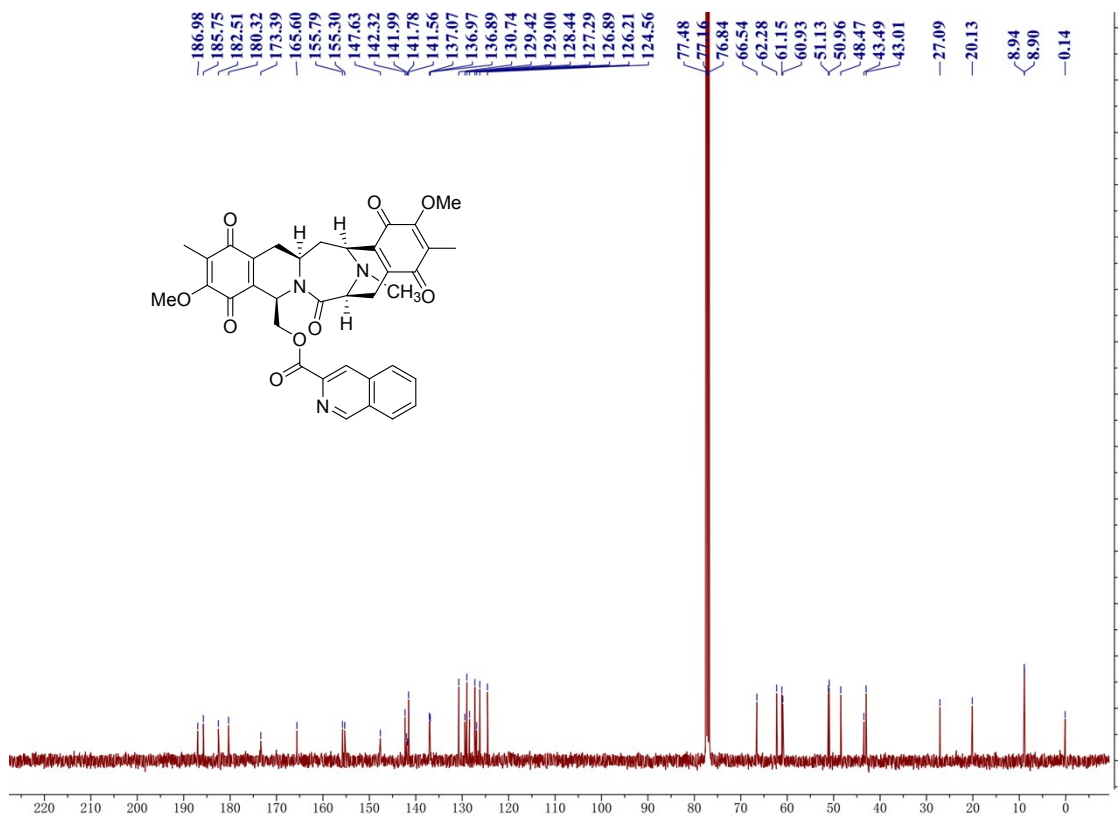

### <sup>1</sup>H NMR of compound 36

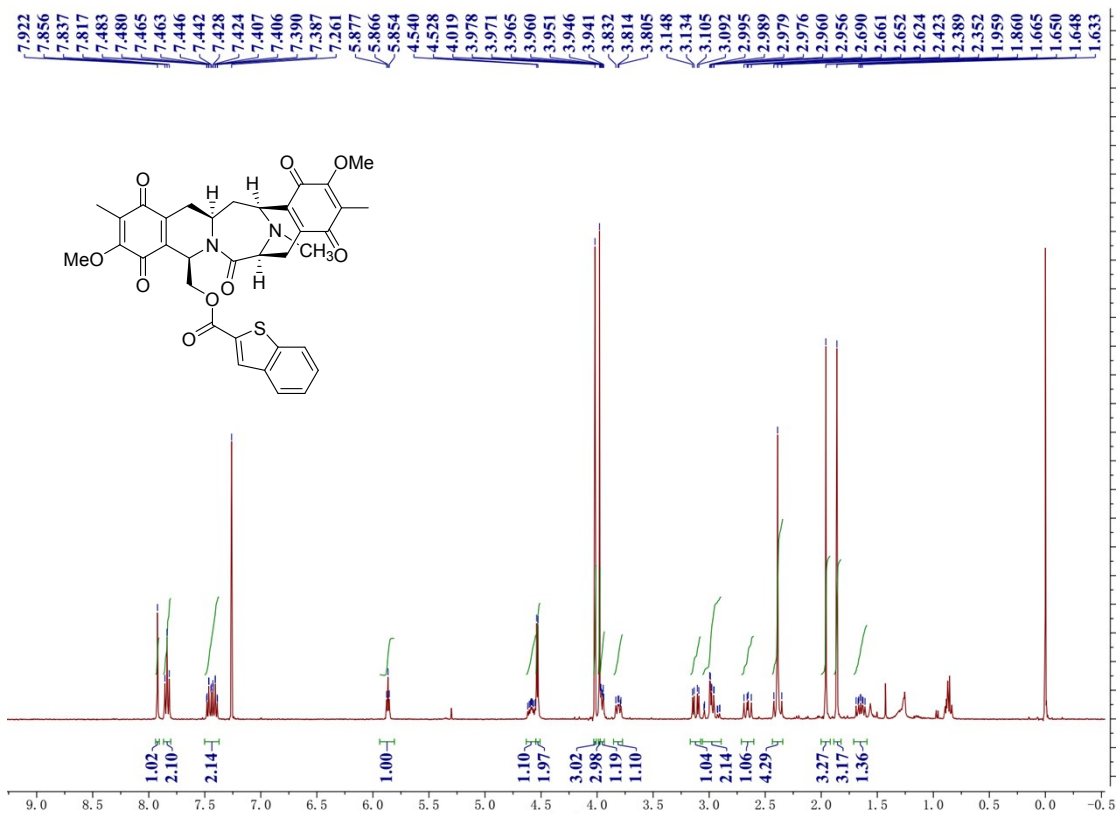

### <sup>13</sup>C NMR of compound 36

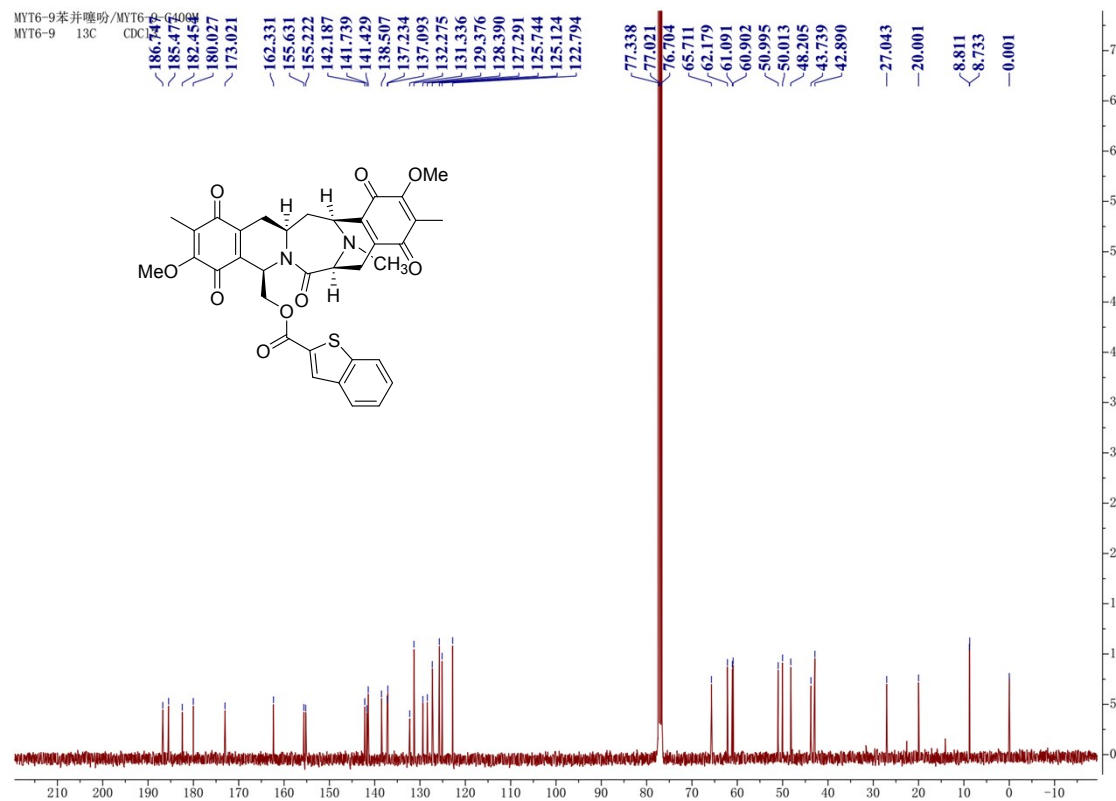

### <sup>1</sup>H NMR of compound 37

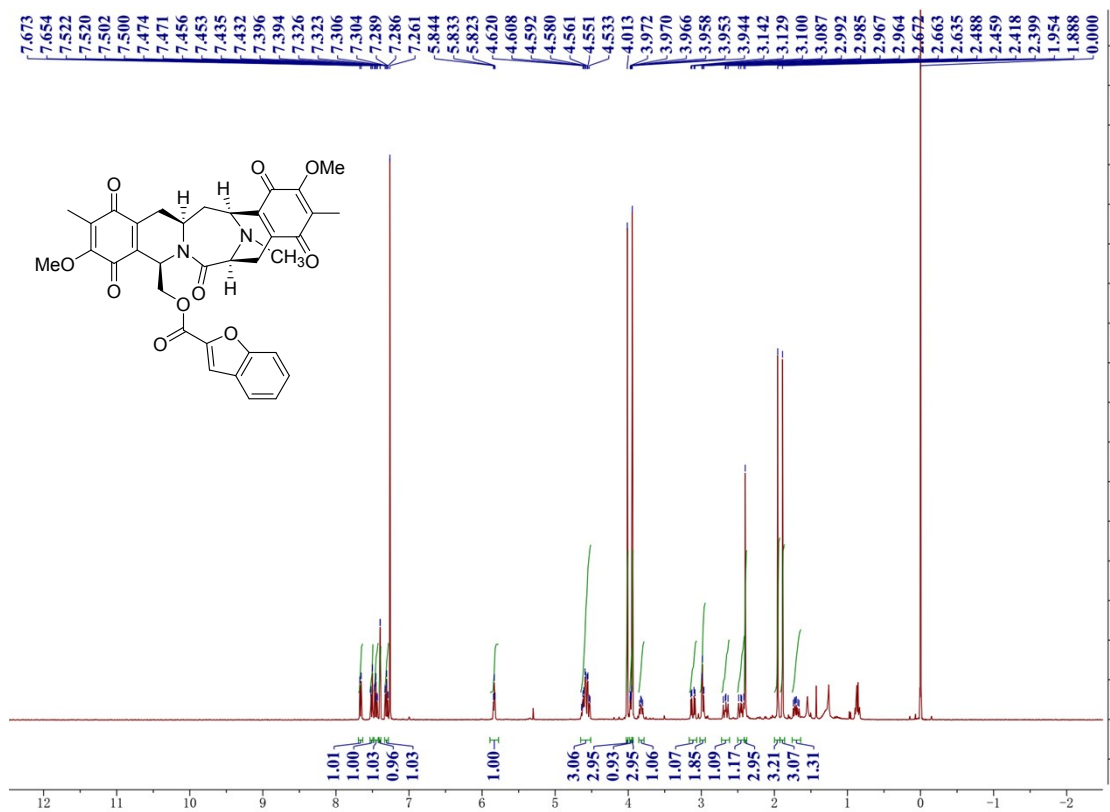

### <sup>13</sup>C NMR of compound 37

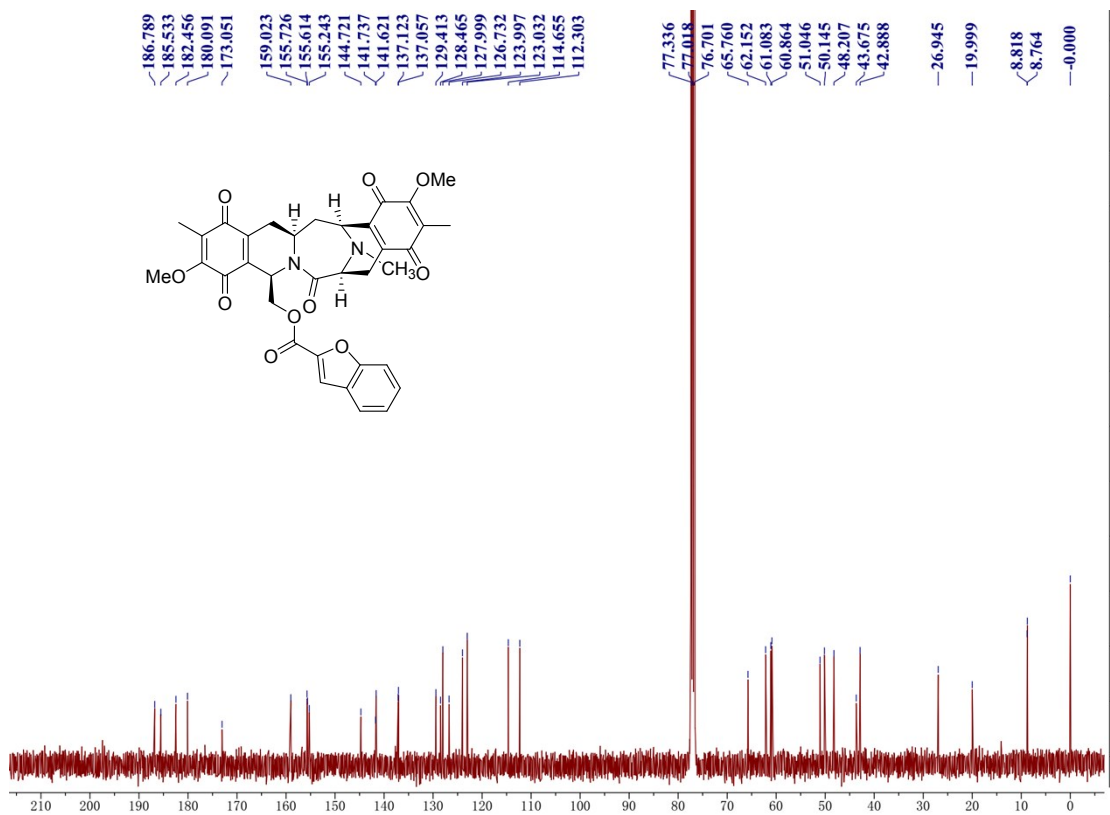

# <sup>1</sup>H NMR of compound 38

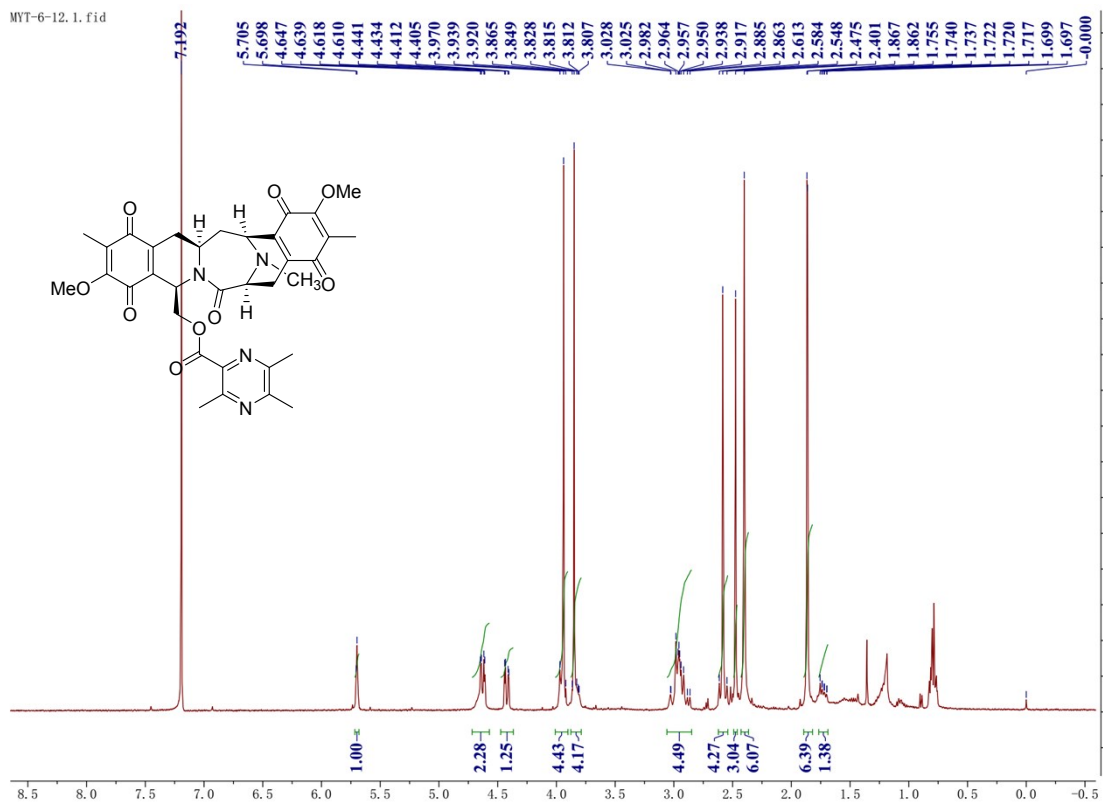

# <sup>13</sup>C NMR of compound 38

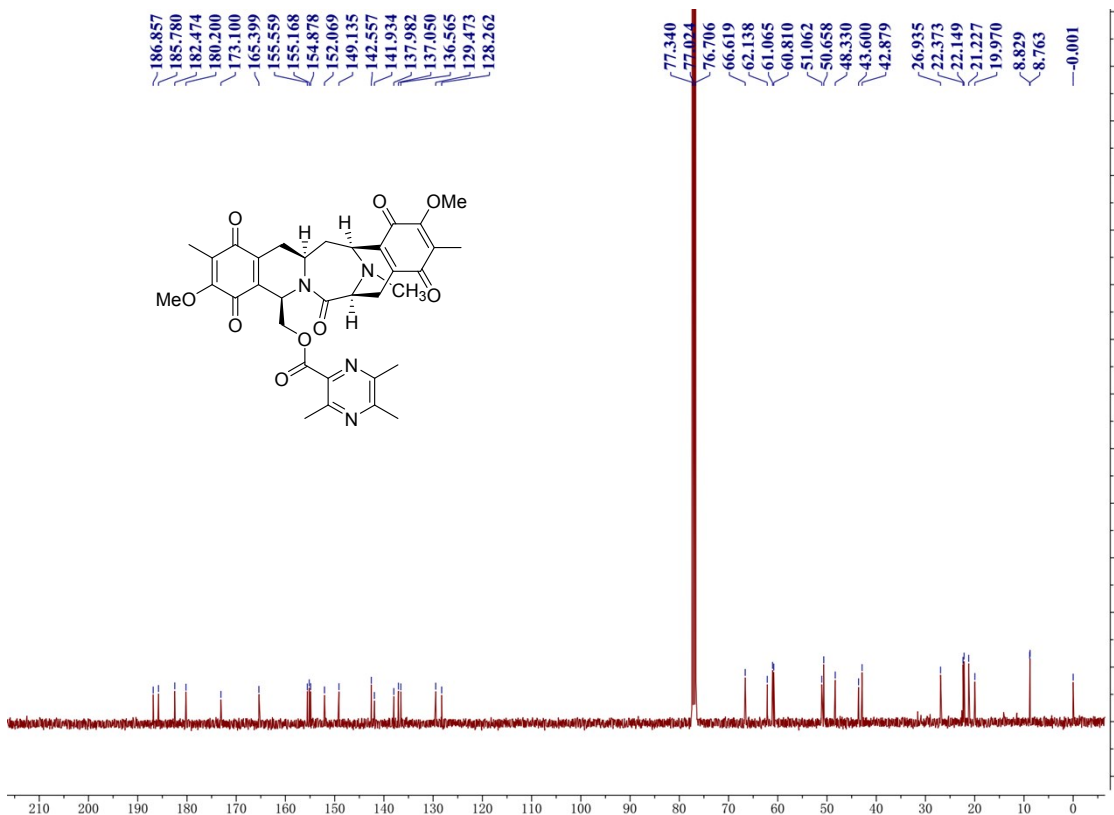

### $^1\text{H}$ NMR of compound **39**

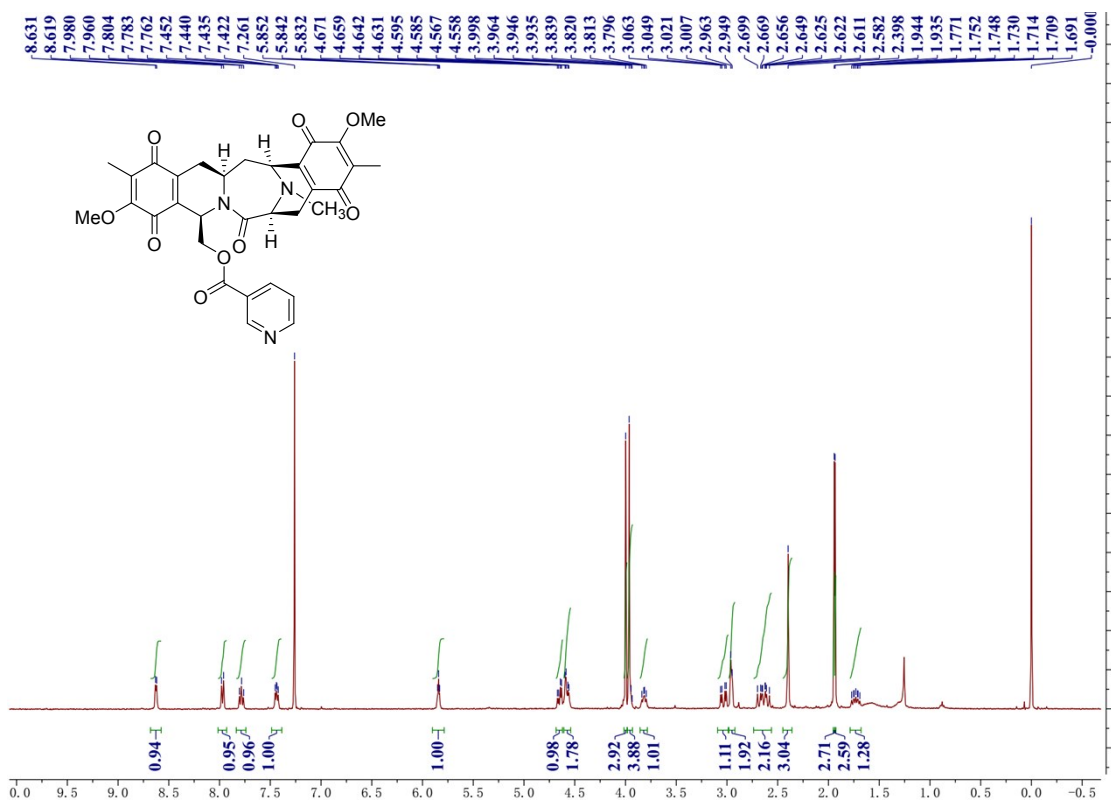

### $^{13}\text{C}$ NMR of compound **39**

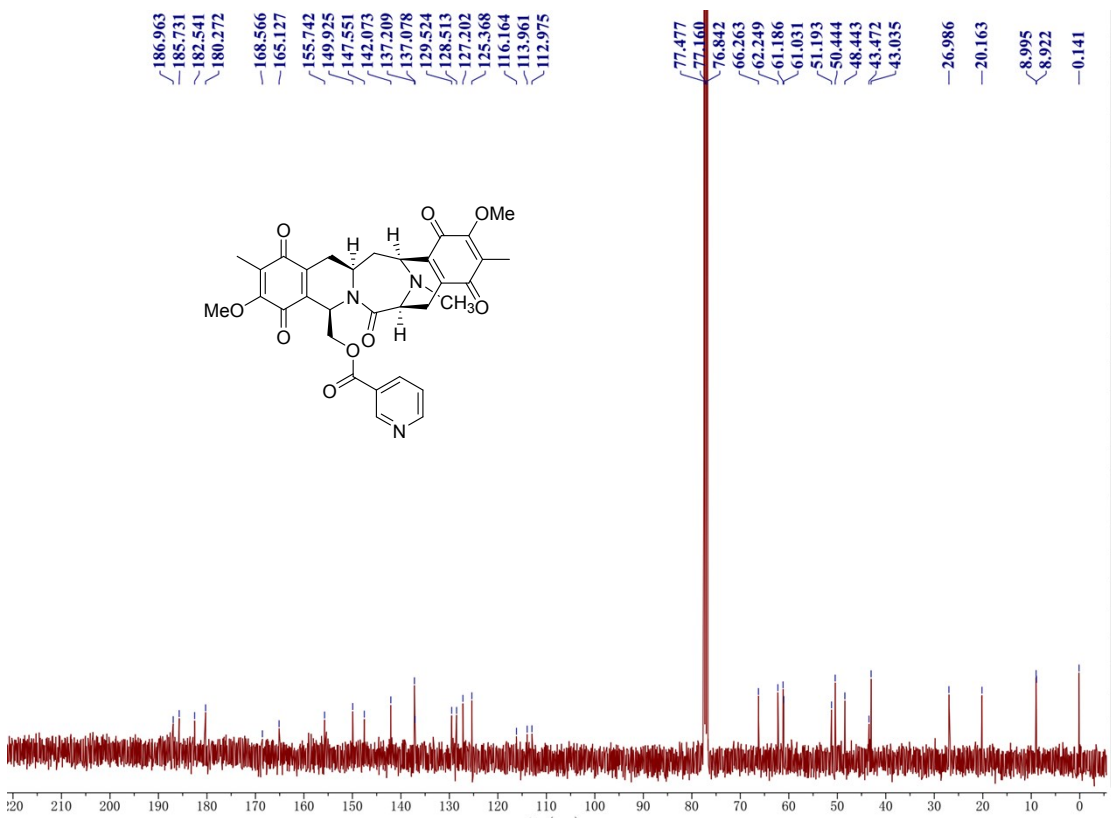

### <sup>1</sup>H NMR of compound 40

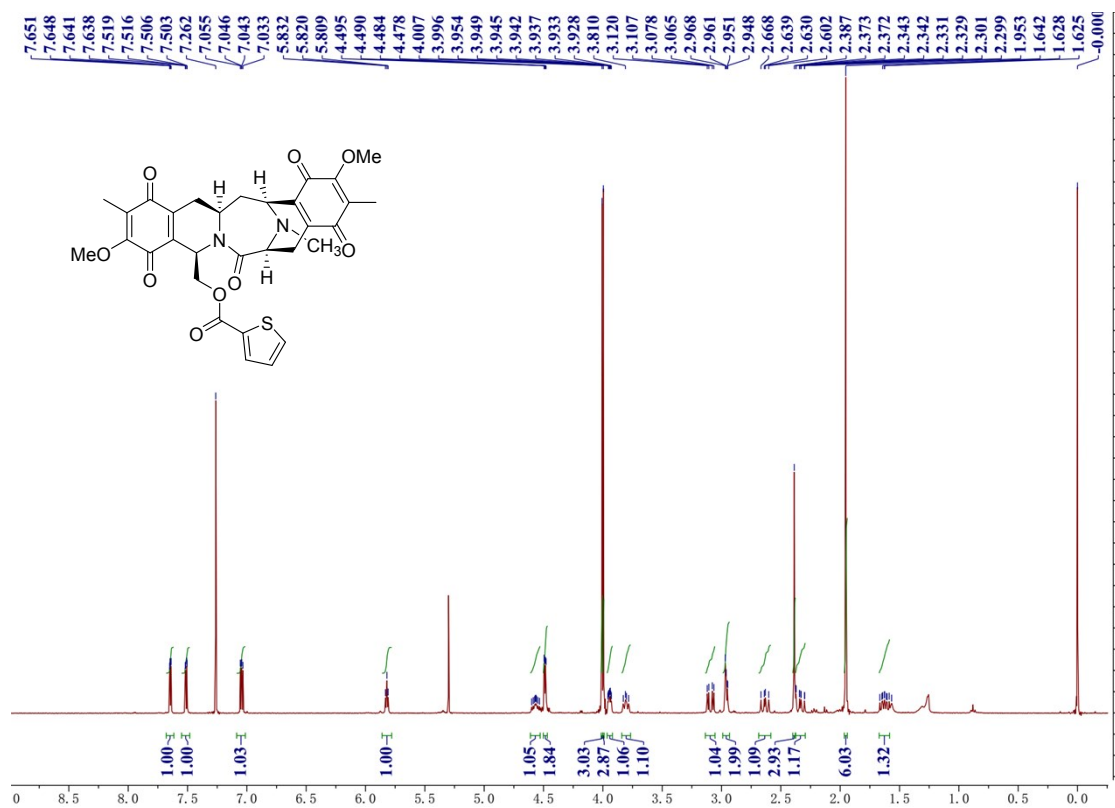

### <sup>13</sup>C NMR of compound 40

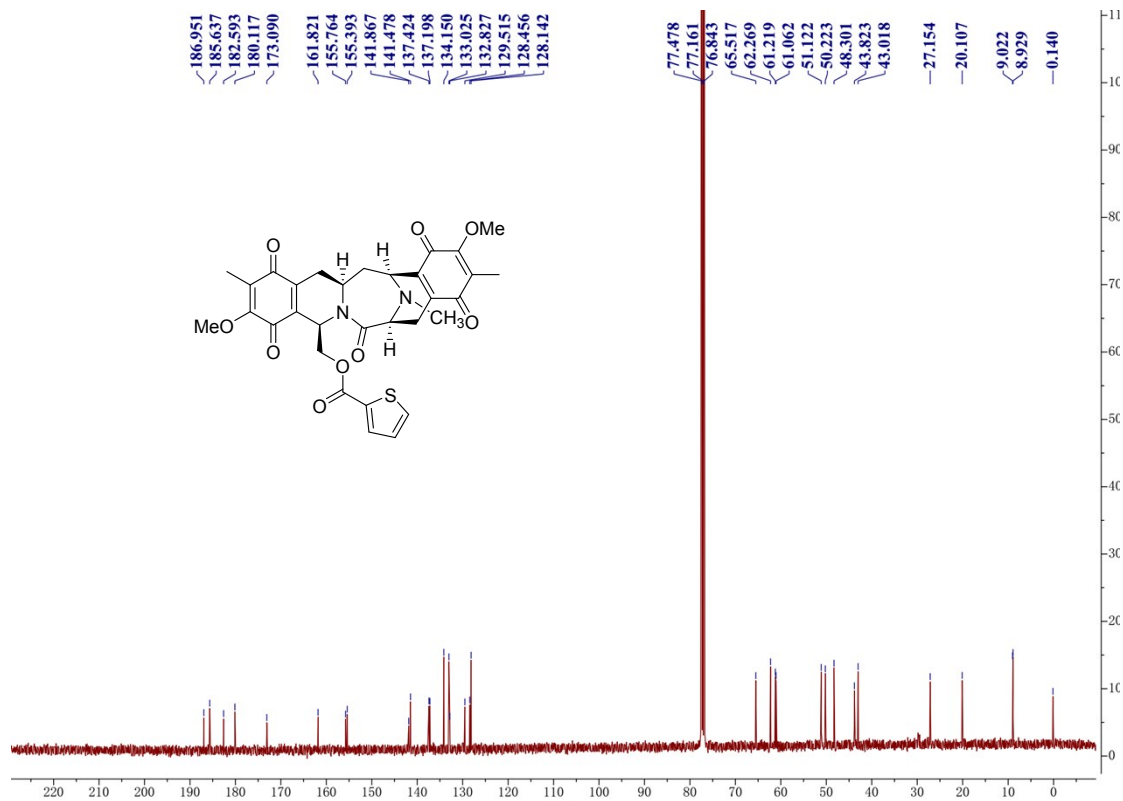

# <sup>1</sup>H NMR of compound 41

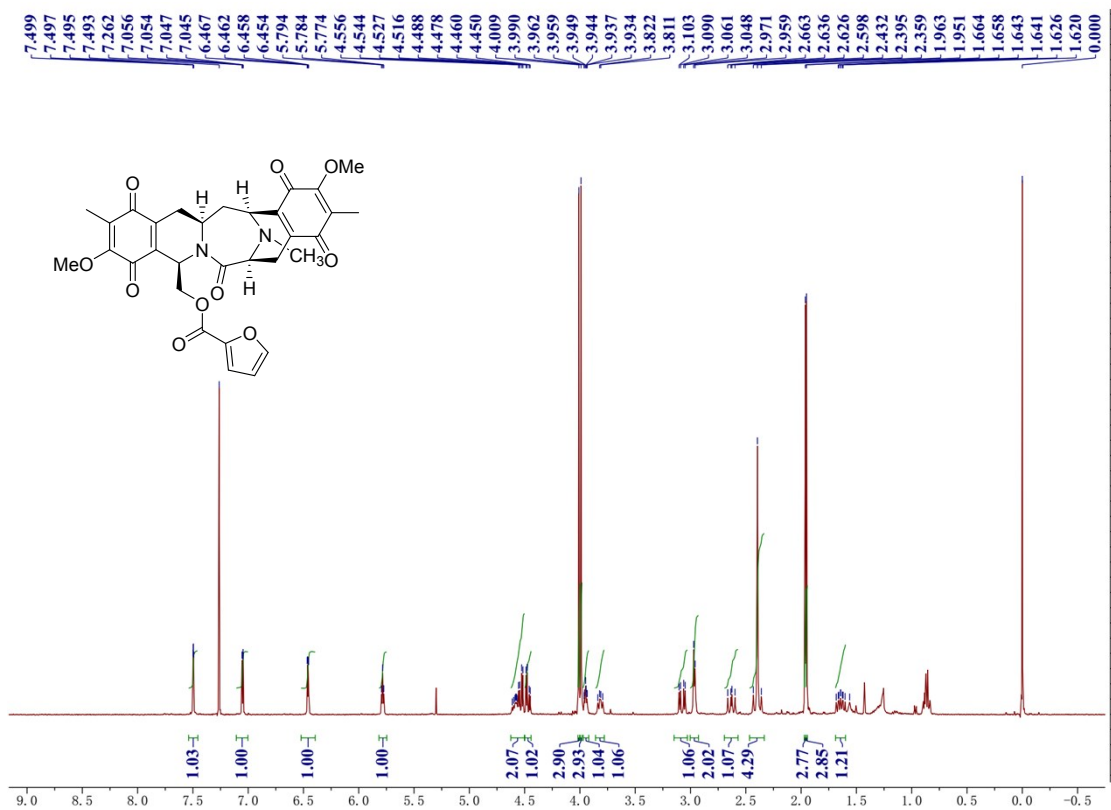

# <sup>13</sup>C NMR of compound 41

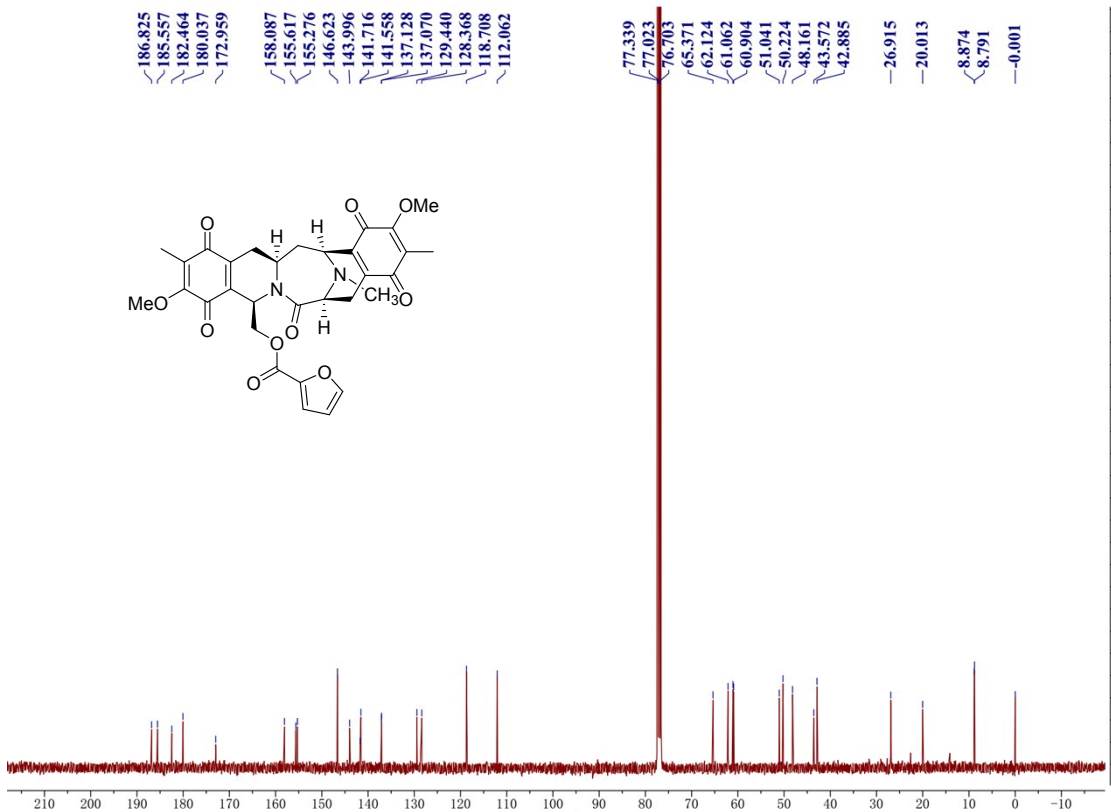



# <sup>1</sup>H NMR of compound 42

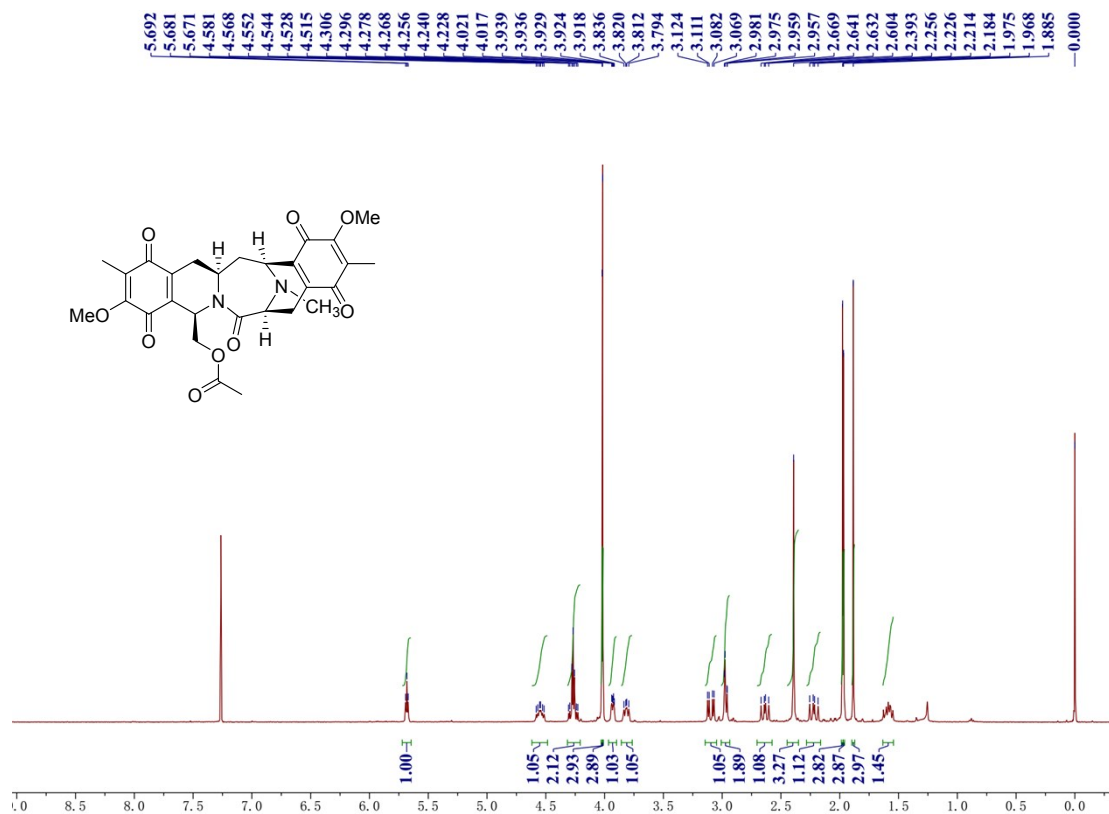

# <sup>13</sup>C NMR of compound 42

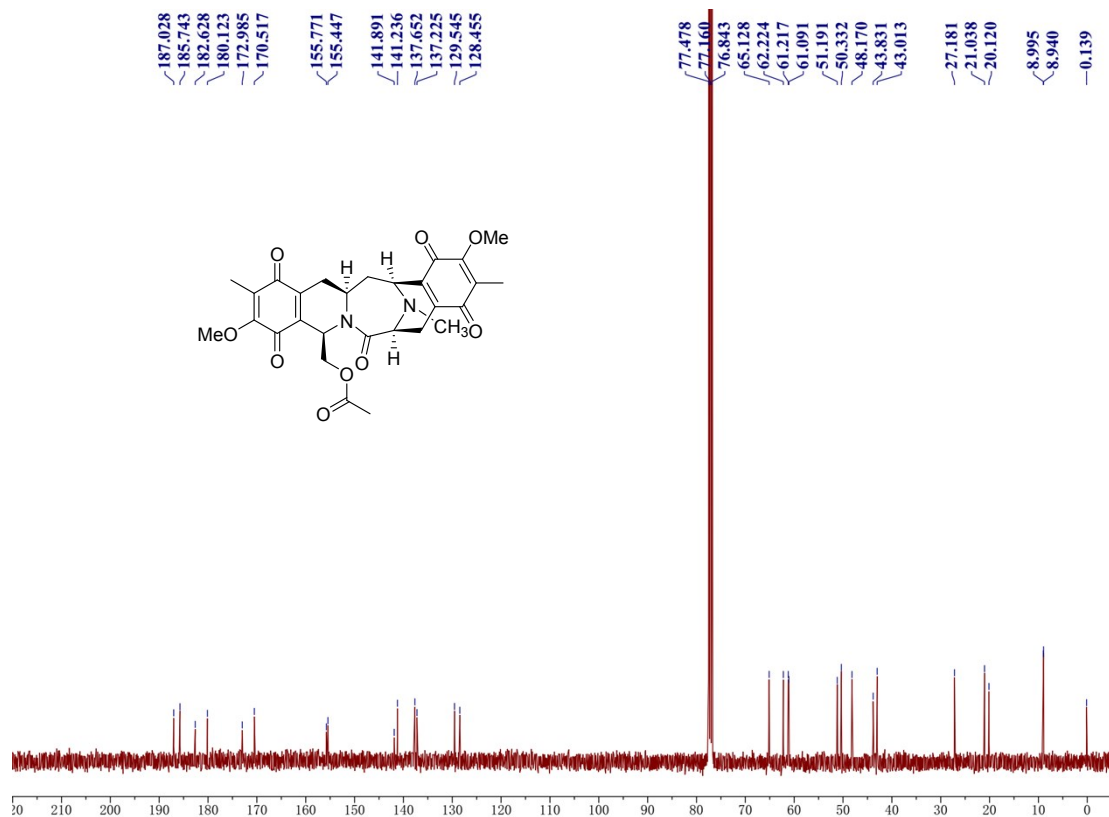

Supplement: d0ob02167a1.pdf [file d0ob02167a1.pdf]
